# Supplementary material for: Human MicroRNAs Originated from Two Periods at Accelerated Rates in Mammalian Evolution
Source: PubMed Central journal article supplement — Mol Biol Evol. 2012 Nov 20;30(3):613–26. doi: 10.1093/molbev/mss262 (PMC3563971; doi:10.1093/molbev/mss262), 2012-11-20
Supplement: supp_mss262_SUPPLEMENTARY_MATERIAL_Table_S1.pdf [file supp_mss262_SUPPLEMENTARY_MATERIAL_Table_S1.pdf]

†: Assignment of presence or absence of orthologs is not good concordance (< 50 %) between EPO and Pecan alignment results. (In total 3 miRNAs are indicated in the Origination period column.)

| Chromosomal location |          |  | Human chromosome |          |  |
|----------------------|----------|--|------------------|----------|--|
| end                  | start    |  | end              | start    |  |
| 30503                | 30366    |  | 10287861         | 10027439 |  |
| 1102578              | 1102484  |  | 6489956          | 6489894  |  |
| 1103332              | 1103243  |  | 9211836          | 9211727  |  |
| 1104467              | 1104385  |  | 10287776         | 10287776 |  |
| 3044599              | 3044539  |  | 10287776         | 10287776 |  |
| 3477354              | 3477259  |  | 10287776         | 10287776 |  |
| 5624203              | 5624131  |  | 10287776         | 10287776 |  |
| 5922801              | 5922732  |  | 10287776         | 10287776 |  |
| 6489956              | 6489894  |  | 10287776         | 10287776 |  |
| 9211836              | 9211727  |  | 10287776         | 10287776 |  |
| 10027516             | 10027439 |  | 10287776         | 10287776 |  |
| 10287861             | 10287776 |  | 10287776         | 10287776 |  |

[illegible]

|                 |      |    |   |   |    |    |    |    |    |    |    |    |    |    |    |    |    |    |    |    |    |    |    |    |    |    |    |    |    |    |    |    |    |    |    |    |    |    |           |           |           |           |           |           |           |           |           |           |           |
|-----------------|------|----|---|---|----|----|----|----|----|----|----|----|----|----|----|----|----|----|----|----|----|----|----|----|----|----|----|----|----|----|----|----|----|----|----|----|----|----|-----------|-----------|-----------|-----------|-----------|-----------|-----------|-----------|-----------|-----------|-----------|
| hsa-mir-9-1     | CONS |    | 1 | 1 | 1  | 1  | 1  | 0  | 1  | 1  | 1  | 1  | 1  | 1  | 1  | 1  | 1  | 1  | 1  | 0  | 1  | 0  | 1  | 1  | 1  | 1  | NA | 1  | 1  | NA | 0  | 0  | NA | NA | NA | NA | 1  | 1  | 156390133 | 156390221 |           |           |           |           |           |           |           |           |           |
| hsa-mir-765     | 2    |    | 1 | 1 | 1  | 1  | 1  | 1  | 0  | -1 | -1 | -1 | -1 | -1 | -1 | 1  | 1  | 0  | 1  | -1 | -1 | 0  | 0  | -1 | 0  | 0  | -1 | NA | 0  | 0  | NA | 0  | 0  | NA | NA | NA | NA | NA | 1         | 1         | 156905923 | 156906036 |           |           |           |           |           |           |           |
| hsa-mir-4259    | 1    |    | 1 | 1 | 0  | 1  | 1  | 1  | 1  | 0  | 1  | -1 | -1 | -1 | -1 | -1 | 1  | 1  | 0  | 1  | 0  | -1 | -1 | -1 | 1  | 0  | 1  | NA | 0  | 0  | NA | 0  | 0  | NA | NA | NA | NA | NA | 1         | 1         | 159869769 | 159869869 |           |           |           |           |           |           |           |
| hsa-mir-5187    | 1    |    | 1 | 1 | 1  | 1  | -1 | -1 | 1  | 1  | -1 | -1 | 0  | 0  | -1 | -1 | 1  | -1 | -1 | 1  | -1 | -1 | -1 | 0  | 0  | 1  | NA | 0  | 0  | NA | 0  | 0  | NA | NA | NA | NA | NA | 1  | 1         | 161196976 | 161197051 |           |           |           |           |           |           |           |           |
| hsa-mir-4654    | 2    |    | 1 | 1 | 1  | 1  | 1  | 1  | -1 | -1 | -1 | -1 | -1 | -1 | -1 | -1 | -1 | -1 | -1 | -1 | -1 | 1  | 0  | 0  | 0  | 0  | 1  | NA | 0  | 0  | NA | 0  | 0  | NA | NA | NA | NA | NA | 1         | 1         | 162126897 | 162126972 |           |           |           |           |           |           |           |
| hsa-mir-556     | 7    |    | 1 | 1 | 1  | 1  | 1  | 1  | 1  | 0  | 0  | 0  | 0  | 0  | 0  | -1 | 0  | 0  | 0  | 0  | 0  | 0  | 0  | 0  | 0  | 0  | 0  | 0  | 0  | 0  | 0  | 0  | 0  | 0  | 0  | 0  | 0  | 1  | 1         | 162312336 | 162312430 |           |           |           |           |           |           |           |           |
| hsa-mir-3658    | NO   | 14 | 0 | 0 | 0  | 0  | 0  | 0  | 0  | 0  | 0  | 0  | 0  | 0  | 0  | 0  | 0  | 0  | 0  | 0  | 0  | 0  | 0  | 0  | 0  | 0  | 0  | 0  | 0  | 0  | 0  | 0  | 0  | 0  | 0  | 0  | 0  | 0  | 0         | 1         | 1         | 165877158 | 165877213 |           |           |           |           |           |           |
| hsa-mir-921     | 2    |    | 1 | 1 | 1  | 1  | 1  | 1  | 1  | 0  | 0  | 0  | 0  | 0  | -1 | 0  | 0  | -1 | 0  | -1 | 0  | 0  | 0  | 0  | 1  | -1 | -1 | NA | 0  | 0  | NA | 0  | 0  | 0  | NA | NA | NA | NA | NA        | 1         | 1         | 166123980 | 166124035 |           |           |           |           |           |           |
| hsa-mir-1255b-2 | 8    |    | 1 | 1 | 1  | 1  | 0  | 1  | -1 | 0  | 0  | 0  | 0  | 0  | 0  | 0  | 0  | 0  | 0  | 0  | 0  | 0  | 0  | 0  | 0  | 0  | 0  | 0  | 0  | 0  | 0  | 0  | 0  | 0  | 0  | 0  | 0  | 0  | 0         | 0         | 0         | 0         | 1         | 1         | 167967898 | 167967964 |           |           |           |
| hsa-mir-557     | 2    |    | 1 | 1 | 1  | 1  | -1 | 0  | 0  | 0  | -1 | 1  | 0  | 0  | 0  | 0  | -1 | 1  | 0  | 0  | 0  | -1 | 0  | 1  | 0  | 0  | 0  | 0  | 0  | 0  | 0  | 0  | 0  | 0  | 0  | 0  | 0  | 0  | 0         | 0         | 0         | 0         | 1         | 1         | 168344762 | 168344859 |           |           |           |
| hsa-mir-3119-1  | 11   |    | 1 | 1 | 1  | 0  | -1 | 0  | 0  | 0  | 0  | 0  | 0  | 0  | 0  | 0  | 0  | 0  | 0  | 0  | 0  | 0  | 0  | 0  | 0  | 0  | 0  | 0  | 0  | 0  | 0  | 0  | 0  | 0  | 0  | 0  | 0  | 0  | 0         | 0         | 0         | 0         | 0         | 0         | 0         | 1         | 1         | 170120519 | 170120603 |
| hsa-mir-3119-2  | 9    |    | 1 | 1 | 1  | 0  | 1  | 0  | 0  | 0  | 0  | 0  | 0  | 0  | 0  | 0  | 0  | 0  | 0  | 0  | 0  | 0  | 0  | 0  | 0  | 0  | 0  | 0  | 0  | 0  | 0  | 0  | 0  | 0  | 0  | 0  | 0  | 0  | 0         | 0         | 0         | 0         | 0         | 0         | 0         | 1         | 1         | 170120519 | 170120603 |
| hsa-mir-1295a   | 9    |    | 1 | 1 | 1  | 1  | 1  | 0  | 0  | 0  | 0  | 0  | 0  | 0  | 0  | 0  | -1 | 0  | 0  | 0  | 0  | 0  | 0  | 0  | 0  | 0  | 0  | 0  | 0  | 0  | 0  | 0  | 0  | 0  | 0  | 0  | 0  | 0  | 0         | 0         | 0         | 0         | 0         | 0         | 0         | 1         | 1         | 171070869 | 171070947 |
| hsa-mir-1295b   | 9    |    | 1 | 1 | 1  | 1  | 1  | 0  | 0  | 0  | 0  | 0  | 0  | 0  | 0  | 0  | -1 | 0  | 0  | 0  | 0  | 0  | 0  | 0  | 0  | 0  | 0  | 0  | 0  | 0  | 0  | 0  | 0  | 0  | 0  | 0  | 0  | 0  | 0         | 0         | 0         | 0         | 0         | 0         | 0         | 1         | 1         | 171070880 | 171070939 |
| hsa-mir-214     | CONS |    | 1 | 1 | 1  | 1  | 1  | 1  | 1  | 1  | 1  | 1  | 1  | 1  | 1  | 1  | 1  | 1  | 1  | 1  | 0  | 1  | 1  | 1  | 1  | 0  | 0  | NA | 1  | 0  | NA | 1  | 0  | NA | NA | NA | NA | NA | 1         | 1         | 172107938 | 172108047 |           |           |           |           |           |           |           |
| hsa-mir-3120    | CONS |    | 1 | 1 | 1  | 1  | 1  | 1  | 1  | 1  | 1  | 1  | 1  | 1  | 1  | 1  | 1  | 1  | 1  | 1  | 0  | 1  | 1  | 1  | 1  | 0  | 0  | NA | 1  | 0  | NA | 1  | 1  | NA | NA | NA | NA | NA | 1         | 1         | 172107948 | 172108028 |           |           |           |           |           |           |           |
| hsa-mir-199a-2  | CONS |    | 1 | 1 | 1  | 1  | 1  | 1  | 0  | 1  | 1  | 1  | 1  | 1  | 1  | 1  | 1  | 1  | 1  | 1  | 1  | 1  | 1  | 1  | 1  | 1  | 1  | NA | 1  | 1  | NA | 1  | 1  | NA | NA | NA | NA | NA | 1         | 1         | 172113675 | 172113784 |           |           |           |           |           |           |           |
| hsa-mir-488     | 0    |    | 1 | 1 | 1  | 1  | 1  | 1  | 1  | 1  | 1  | 1  | 1  | 1  | 1  | 1  | 1  | 1  | 1  | 1  | 0  | 1  | 0  | 0  | 0  | 0  | 1  | NA | 0  | 1  | NA | 0  | 0  | NA | NA | NA | NA | NA | 1         | 1         | 176998499 | 176998581 |           |           |           |           |           |           |           |
| hsa-mir-4424    | 10   |    | 1 | 1 | 1  | 1  | 0  | -1 | 0  | 0  | 0  | 0  | 0  | 0  | 0  | 0  | 0  | 0  | 0  | 0  | 0  | 0  | 0  | 0  | 0  | 0  | 0  | 0  | 0  | 0  | 0  | 0  | 0  | 0  | 0  | 0  | 0  | 0  | 0         | 0         | 0         | 0         | 0         | 0         | 1         | 1         | 178646884 | 178646969 |           |
| hsa-mir-3121    | 9    |    | 1 | 1 | 1  | 1  | 1  | 0  | 0  | 0  | 0  | 1  | 0  | 0  | 0  | 0  | 0  | 0  | 0  | 0  | 0  | 0  | 0  | 0  | 0  | 0  | 0  | 0  | 0  | 0  | 0  | 0  | 0  | 0  | 0  | 0  | 0  | 0  | 0         | 0         | 0         | 0         | 0         | 0         | 0         | 1         | 1         | 180407449 | 180407525 |
| hsa-mir-4426    | NO   | 14 | 0 | 0 | 0  | 0  | 0  | 0  | 0  | 0  | 0  | 1  | 0  | 0  | 0  | 0  | 0  | 0  | 0  | 0  | 0  | 0  | 0  | 1  | 1  | 0  | 0  | 0  | 0  | 0  | 0  | 0  | 0  | 0  | 0  | 0  | 0  | 0  | 0         | 0         | 0         | 0         | 0         | 0         | 0         | 1         | 1         | 192685458 | 192685520 |
| hsa-mir-1278    | 7    |    | 1 | 1 | 1  | 1  | 1  | -1 | 1  | 0  | 0  | 0  | 0  | 0  | -1 | -1 | 0  | 0  | 0  | 0  | 0  | 0  | 0  | 0  | 0  | 0  | 0  | 0  | 0  | 0  | 0  | 0  | 0  | 0  | 0  | 0  | 0  | 0  | 0         | 0         | 0         | 0         | 0         | 0         | 0         | 1         | 1         | 193105633 | 193105713 |
| hsa-mir-4735    | 7    |    | 1 | 1 | 1  | 1  | 1  | 0  | 1  | 0  | 0  | 0  | 0  | 0  | 0  | 0  | 0  | 0  | 0  | 0  | 0  | 0  | 0  | 0  | 0  | 0  | 0  | 0  | 0  | 0  | 0  | 0  | 0  | 0  | 0  | 0  | 0  | 0  | 0         | 0         | 0         | 0         | 0         | 0         | 0         | 1         | 1         | 196551543 | 196551611 |
| hsa-mir-181b-1  | CONS |    | 1 | 1 | 1  | 1  | 1  | 1  | 1  | 0  | 1  | 1  | 1  | 1  | 1  | 1  | 1  | 1  | 1  | 1  | 1  | 1  | 1  | 1  | 1  | 1  | 1  | NA | 1  | 1  | NA | 1  | 1  | NA | NA | NA | NA | NA | -1        | 1         | 198828002 | 198828111 |           |           |           |           |           |           |           |
| hsa-mir-181a-1  | CONS |    | 1 | 1 | 1  | 1  | 1  | 1  | 1  | 1  | 1  | 1  | 1  | 1  | 1  | 1  | 1  | 1  | 1  | 1  | 1  | 1  | 1  | 1  | 1  | 1  | 1  | NA | 1  | 1  | NA | 1  | 1  | NA | NA | NA | NA | NA | -1        | 1         | 198828173 | 198828282 |           |           |           |           |           |           |           |
| hsa-mir-5191    | 6    |    | 1 | 1 | -1 | -1 | 1  | 1  | -1 | 1  | 0  | 1  | -1 | 0  | 0  | 0  | -1 | -1 | -1 | -1 | 0  | -1 | 0  | 0  | -1 | 0  | 0  | -1 | NA | 1  | 1  | NA | 1  | 1  | NA | NA | NA | NA | NA        | -1        | 1         | 201688636 | 201688755 |           |           |           |           |           |           |
| hsa-mir-1231    | 2    |    | 1 | 0 | 1  | 0  | 1  | 0  | -1 | -1 | -1 | -1 | -1 | 1  | 1  | -1 | -1 | -1 | -1 | -1 | 0  | 0  | 0  | -1 | -1 | -1 | -1 | 0  | 0  | 0  | 0  | 0  | 0  | 0  | 0  | 0  | 0  | 0  | 0         | 0         | 0         | 0         | 0         | 0         | 0         | 1         | 1         | 201777739 | 201777830 |
| hsa-mir-135b    | -1   |    | 1 | 1 | 1  | 0  | 1  | 1  | 1  | 0  | 1  | 1  | 1  | 1  | 1  | 1  | 1  | 1  | 1  | 1  | 1  | 0  | 0  | 1  | 1  | 0  | 0  | 1  | NA | 1  | 1  | NA | 1  | 0  | NA | NA | NA | NA | NA        | -1        | 1         | 205417430 | 205417526 |           |           |           |           |           |           |
| hsa-mir-29c     | -1   |    | 1 | 1 | 1  | 1  | 1  | 1  | 0  | 1  | 1  | 1  | 1  | 1  | 1  | 1  | 1  | 1  | 1  | 1  | 1  | 1  | 1  | 1  | 1  | 1  | 1  | 0  | NA | 1  | 1  | NA | 1  | 0  | NA | NA | NA | NA | NA        | NA        | 1         | 1         | 207975197 | 207975284 |           |           |           |           |           |
| hsa-mir-29b-2   | CONS |    | 1 | 1 | 1  | 1  | 1  | 1  | 0  | 1  | 1  | 1  | 1  | 1  | 1  | 1  | 1  | 1  | 1  | 1  | 0  | 1  | 1  | 1  | 1  | 1  | 1  | 1  | NA | 1  | -1 | NA | 1  | 1  | NA | NA | NA | NA | NA        | NA        | 1         | 1         | 207975788 | 207975868 |           |           |           |           |           |
| hsa-mir-205     | CONS |    | 1 | 1 | 1  | 1  | 1  | 1  | 1  | 1  | 1  | 1  | 1  | 1  | 1  | 1  | 1  | 1  | 1  | 1  | 0  | 1  | 1  | 1  | 1  | 1  | 1  | NA | 1  | 1  | NA | 1  | 1  | NA | NA | NA | NA | NA | NA        | 1         | 1         | 209605478 | 209605587 |           |           |           |           |           |           |
| hsa-mir-4260    | 7    |    | 1 | 1 | 1  | 1  | 1  | 1  | 1  | 0  | -1 | -1 | 0  | 0  | 0  | 0  | -1 | -1 | 0  | 0  | -1 | -1 | 0  | 0  | -1 | -1 | -1 | -1 | NA | 1  | 1  | NA | 1  | 1  | NA | NA | NA | NA | NA        | 1         | 1         | 209796789 | 209796855 |           |           |           |           |           |           |
| hsa-mir-3122    | 8    |    | 1 | 1 | 1  | -1 | 1  | 1  | 0  | 0  | 0  | -1 | 0  | 0  | 0  | 0  | -1 | -1 | 0  | 0  | -1 | -1 | 0  | 0  | 0  | 0  | 0  | 0  | 0  | 0  | 0  | 0  | 0  | 0  | 0  | 0  | 0  | 0  | 0         | 0         | 0         | 0         | 0         | 0         | 0         | 1         | 1         | 212250955 | 212251027 |
| hsa-mir-215     | CONS |    | 1 | 1 | 1  | 0  | 1  | 0  | 0  | 1  | 0  | 1  | 1  | 1  | 0  | 0  | 1  | 1  | 0  | 1  | 1  | 0  | 1  | 1  | 1  | 1  | 0  | 0  | NA | 1  | 0  | NA | 0  | 1  | NA | NA | NA | NA | NA        | NA        | 1         | 1         | 220291195 | 220291304 |           |           |           |           |           |
| hsa-mir-194-1   | CONS |    | 1 | 1 | 1  | 0  | 1  | 0  | 0  | 1  | 0  | 1  | 1  | 1  | 0  | 0  | 1  | 0  | 1  | 0  | 1  | 1  | 0  | 1  | 1  | 1  | 1  | 0  | NA | 0  | 1  | NA | 1  | 1  | NA | NA | NA | NA | NA        | NA        | 1         | 1         | 220291499 | 220291583 |           |           |           |           |           |
| hsa-mir-664     | 1    |    | 1 | 1 | 1  | 1  | 1  | 1  | 0  | 1  | 1  | 1  | 1  | 1  | 1  | 1  | 1  | 1  | 1  | 1  | 1  | -1 | 1  | 1  | 1  | -1 | -1 | 1  | NA | 0  | 0  | NA | 0  | 0  | NA | NA | NA | NA | NA        | NA        | 1         | 1         | 220373880 | 220373961 |           |           |           |           |           |
| hsa-mir-320b-2  | 1    |    | 1 | 1 | -1 | 0  | 1  | 1  | 0  | 0  | 1  | 1  | 0  | 0  | 0  | 0  | 1  | 1  | 1  | -1 | 0  | 0  | 0  | 0  | 1  | 0  | 1  | 0  | NA | 0  | 0  | NA | 0  | 0  | NA | NA | NA | NA | NA        | NA        | 1         | 1         | 224444706 | 224444843 |           |           |           |           |           |
| hsa-mir-4742    | 2    |    | 1 | 1 | 1  | 1  | 1  | 1  | 1  | 0  | 0  | 1  | 0  | -1 | -1 | 0  | 0  | 0  | 0  | 1  | 0  | 1  | 0  | 1  | -1 | -1 | 1  | 0  | NA | 0  | 0  | NA | 0  | 0  | 0  | NA | NA | NA | NA        | NA        | 1         | 1         | 224585929 | 224586013 |           |           |           |           |           |
| hsa-mir-5008    | 8    |    | 1 | 0 | 1  | -1 | 1  | 1  | 0  | 0  | 0  | -1 | -1 | 0  | 0  | 0  | 0  | 0  | 0  | -1 | 0  | -1 | 0  | 0  | -1 | -1 | 0  | 0  | 0  | 0  | 0  | 0  | 0  | 0  | 0  | 0  | 0  | 0  | 0         | 0         | 0         | 0         | 0         | 0         | 0         | 1         | 1         | 228129291 | 228129384 |
| hsa-mir-3620    | 2    |    | 1 | 0 | 1  | 1  | 1  | 0  | 0  | 0  | -1 | -1 | -1 | -1 | -1 | -1 | -1 | -1 | -1 | -1 | -1 | -1 | -1 | 0  | -1 | 1  | 0  | 0  | 0  | 0  | 0  | 0  | 0  | 0  | 0  | 0  | 0  | 0  | 0         | 0         | 0         | 0         | 0         | 0         | 0         | 1         | 1         | 228284964 | 228285042 |
| hsa-mir-4666a   | 0    |    | 1 | 1 | 1  | 1  | 1  | 1  | 1  | 0  | 0  | 1  | 0  | 0  | 0  | 0  | 0  | 0  | 0  | -1 | 0  | 0  | 0  | 0  | 0  | 0  | 0  | 0  | 0  | 0  | 0  | 0  | 0  | 0  | 0  | 0  | 0  | 0  | 0         | 0         | 0         | 0         | 0         | 0         | 0         | 1         | 1         | 228649775 | 228649853 |

[illegible]

[illegible]

[illegible]

[illegible]

[illegible]

[illegible]



[illegible]







|                |      |    |   |   |   |    |   |    |    |    |    |    |    |    |    |    |    |    |    |    |    |    |    |      |    |    |    |    |    |    |    |    |    |    |    |    |    |    |    |    |    |    |    |    |    |          |          |          |          |
|----------------|------|----|---|---|---|----|---|----|----|----|----|----|----|----|----|----|----|----|----|----|----|----|----|------|----|----|----|----|----|----|----|----|----|----|----|----|----|----|----|----|----|----|----|----|----|----------|----------|----------|----------|
| hsa-mir-3649   | 2    |    | 1 | 1 | 1 | 1  | 0 | 0  | -1 | -1 | 1  | 0  | 0  | 0  | 0  | 0  | 0  | 0  | -1 | 1  | 0  | 0  | 0  | -1   | 0  | 0  | 1  | 0  | -1 | 0  | -1 | -1 | -1 | 0  | 1  | NA | NA | 0  | NA | NA | 0  | 0  | 0  | 0  | 0  | NA       | 12       | 1769481  | 1769546  |
| hsa-mir-200c   | 0    |    | 1 | 1 | 1 | 1  | 1 | 1  | 0  | 0  | 1  | 0  | 1  | 1  | 0  | 1  | 1  | 0  | 1  | 0  | 1  | 0  | 1  | 1    | 1  | 1  | 1  | 1  | 1  | 0  | 0  | 0  | 1  | 1  | NA | NA | 0  | NA | NA | 0  | 0  | 0  | 0  | 0  | NA | 12       | 7072862  | 7072929  |          |
| hsa-mir-141    | 0    |    | 1 | 1 | 1 | 1  | 1 | 1  | 0  | 1  | 1  | 1  | 1  | 1  | 0  | 1  | 1  | 1  | 0  | 1  | 0  | 1  | 1  | 1    | 1  | 1  | 1  | 1  | 0  | 0  | 0  | 1  | 1  | 0  | 1  | NA | NA | 0  | NA | NA | 0  | 0  | 0  | 0  | 0  | NA       | 12       | 7073260  | 7073354  |
| hsa-mir-1244-3 | -1   |    | 1 | 1 | 0 | 0  | 1 | 0  | 0  | 1  | 0  | 0  | 0  | 0  | 1  | 0  | 1  | 0  | 0  | 1  | 0  | 1  | 0  | 1    | 1  | 1  | 1  | 1  | 0  | 1  | 1  | 1  | 1  | 1  | NA | 0  | 0  | NA | 1  | 0  | NA | NA | NA | NA | -1 | NA       | 12       | 9392063  | 9392147  |
| hsa-mir-613    | 9    |    | 1 | 1 | 0 | -1 | 1 | -1 | -1 | 0  | -1 | 0  | 0  | 0  | 0  | 0  | 0  | 0  | 0  | -1 | 0  | 0  | 0  | 0    | 0  | 0  | 0  | 0  | 0  | 0  | 0  | 0  | 0  | 0  | NA | 0  | 0  | NA | 1  | 0  | NA | NA | NA | NA | -1 | NA       | 12       | 12917583 | 12917677 |
| hsa-mir-614    | 9    |    | 1 | 1 | 1 | 1  | 1 | -1 | 0  | 0  | -1 | -1 | -1 | -1 | -1 | 0  | 0  | -1 | -1 | 0  | 0  | -1 | -1 | -1   | -1 | -1 | 0  | 0  | -1 | 0  | 0  | 0  | 0  | NA | 0  | 0  | NA | 0  | 0  | NA | NA | NA | NA | -1 | NA | 12       | 13068763 | 13068852 |          |
| hsa-mir-3974   | 1    |    | 1 | 1 | 1 | 1  | 1 | 0  | 1  | 1  | 1  | 1  | 0  | 0  | 0  | 0  | 0  | 0  | 0  | 1  | 0  | -1 | 1  | 1    | 1  | 0  | 1  | 0  | 0  | 0  | 1  | 1  | 1  | NA | 0  | 0  | NA | 0  | 0  | NA | NA | NA | NA | -1 | NA | 12       | 17826233 | 17826328 |          |
| hsa-mir-920    | 8    |    | 1 | 1 | 1 | -1 | 1 | 1  | 0  | 0  | 0  | 0  | -1 | 0  | 0  | -1 | 0  | -1 | -1 | -1 | 0  | -1 | 0  | -1   | -1 | -1 | -1 | -1 | 0  | -1 | 0  | 0  | 0  | NA | 0  | 0  | NA | 0  | 0  | NA | NA | NA | NA | -1 | NA | 12       | 24365355 | 24365429 |          |
| hsa-mir-4302   | 9    |    | 1 | 1 | 0 | 1  | 1 | 0  | 0  | 0  | 0  | 0  | 0  | 0  | 0  | -1 | 0  | 0  | 1  | 0  | 0  | 0  | 0  | 0    | 0  | 0  | 0  | 0  | 0  | 0  | 0  | 0  | 0  | NA | 0  | 0  | NA | 0  | 0  | NA | NA | NA | NA | -1 | NA | 12       | 26026953 | 26027012 |          |
| hsa-mir-4698   | 7    |    | 1 | 1 | 1 | 0  | 1 | -1 | 1  | 0  | 0  | 0  | 0  | 0  | 0  | 0  | 0  | 0  | 0  | 0  | 0  | 0  | 0  | 0    | 0  | 0  | 0  | 0  | 0  | 0  | 0  | 0  | 0  | NA | 0  | 0  | NA | 0  | 0  | NA | NA | NA | NA | -1 | NA | 12       | 47581595 | 47581674 |          |
| hsa-mir-4494   | 8    |    | 1 | 1 | 1 | 1  | 0 | 1  | 0  | 0  | 0  | 0  | 0  | 0  | 0  | 0  | 0  | 0  | 0  | 0  | 0  | 0  | 0  | 0    | 0  | 0  | 0  | 0  | 0  | 0  | 0  | 0  | 0  | NA | 0  | 0  | NA | 0  | 0  | NA | NA | NA | NA | -1 | NA | 12       | 47757969 | 47758052 |          |
| hsa-mir-1291   | 1    |    | 1 | 1 | 0 | 1  | 1 | 1  | 1  | 1  | -1 | 1  | 1  | 0  | 0  | -1 | 1  | -1 | 1  | 1  | -1 | 1  | 1  | 0    | 1  | 1  | 0  | 1  | 1  | -1 | 1  | -1 | 1  | 1  | 0  | NA | NA | 0  | NA | NA | 0  | 0  | 0  | 0  | 0  | NA       | 12       | 49048227 | 49048313 |
| hsa-mir-4701   | CONS |    | 1 | 1 | 1 | 1  | 1 | 1  | 1  | 0  | 1  | 1  | 1  | -1 | -1 | 0  | -1 | 1  | 0  | 1  | 1  | 1  | 1  | 1    | 1  | 1  | 1  | 1  | -1 | 1  | 1  | -1 | -1 | 0  | NA | NA | 0  | NA | NA | 0  | 0  | 0  | 0  | 1  | NA | 12       | 49165758 | 49165820 |          |
| hsa-mir-1293   | 2    |    | 1 | 1 | 1 | 1  | 1 | 0  | 1  | -1 | 0  | 0  | 0  | 0  | 0  | 0  | 0  | 0  | 0  | -1 | 0  | 0  | -1 | 1    | 0  | 0  | 0  | 1  | 0  | 0  | 1  | -1 | 0  | 0  | NA | NA | 0  | NA | NA | 0  | 0  | 0  | 0  | 0  | NA | 12       | 50627925 | 50627995 |          |
| hsa-mir-196a-2 | 1    |    | 1 | 1 | 1 | 1  | 1 | 0  | -1 | 1  | 1  | 1  | 1  | 1  | 1  | 0  | 1  | 1  | 1  | 0  | 1  | 1  | 0  | 1    | 0  | 1  | -1 | 1  | 1  | 0  | 0  | 1  | 1  | 1  | 0  | NA | NA | 0  | NA | NA | 0  | 0  | 0  | 0  | 0  | NA       | 12       | 54385522 | 54385631 |
| hsa-mir-615    | 1    |    | 1 | 1 | 1 | 1  | 0 | 1  | 1  | 0  | 1  | 1  | 1  | 1  | 1  | 1  | 0  | 1  | 1  | 0  | 1  | 0  | 1  | 1    | 0  | 1  | 1  | -1 | 0  | -1 | 1  | 1  | 1  | 0  | NA | NA | 0  | NA | NA | 0  | 0  | 0  | 0  | 0  | NA | 12       | 54427734 | 54427829 |          |
| hsa-mir-3198-2 | 1    |    | 1 | 1 | 1 | 1  | 1 | -1 | -1 | -1 | -1 | -1 | -1 | -1 | -1 | -1 | -1 | -1 | -1 | -1 | -1 | -1 | -1 | -1   | -1 | -1 | -1 | -1 | -1 | 0  | 1  | 1  | -1 | 0  | NA | 0  | 0  | NA | 0  | 0  | NA | NA | NA | NA | -1 | NA       | 12       | 54625181 | 54625260 |
| hsa-mir-148b   | CONS |    | 1 | 1 | 1 | 1  | 1 | 1  | 1  | 1  | 1  | 1  | 1  | 1  | 1  | 1  | 1  | 1  | 1  | 1  | 1  | 1  | 1  | 1    | 1  | 1  | 1  | 1  | 1  | 1  | 1  | 1  | 1  | 0  | NA | NA | 0  | NA | NA | 0  | 0  | 0  | 0  | 1  | NA | 12       | 54731000 | 54731098 |          |
| hsa-mir-1228   | 1    |    | 1 | 0 | 1 | 1  | 1 | 1  | 0  | -1 | 1  | -1 | -1 | -1 | -1 | -1 | -1 | -1 | -1 | -1 | 0  | 0  | -1 | -1   | -1 | -1 | -1 | 0  | 1  | -1 | -1 | 1  | -1 | -1 | NA | NA | 0  | NA | NA | 0  | 0  | -1 | -1 | NA | 12 | 57588287 | 57588359 |          |          |
| hsa-mir-616    | 2    |    | 1 | 1 | 0 | 1  | 1 | 0  | 1  | 0  | 1  | 0  | 0  | -1 | -1 | 0  | 0  | 0  | 0  | -1 | 0  | -1 | -1 | 0    | 0  | 1  | 0  | 1  | 0  | 0  | 0  | 0  | 0  | 1  | NA | NA | 1  | NA | NA | 0  | 0  | 0  | 0  | 1  | NA | 12       | 57912946 | 57913042 |          |
| hsa-mir-26a-2  | CONS |    | 1 | 1 | 1 | 1  | 1 | 1  | 0  | 0  | 1  | 1  | 1  | 0  | 0  | 1  | 1  | 1  | 1  | 1  | 1  | 1  | 0  | 1    | 1  | 1  | 1  | 1  | 1  | 1  | 1  | 1  | 1  | 1  | 0  | NA | NA | 0  | NA | NA | 0  | 0  | 0  | 0  | 1  | NA       | 12       | 58218392 | 58218475 |
| hsa-let-7i     | CONS |    | 1 | 1 | 1 | 1  | 1 | 1  | 1  | 0  | 0  | 1  | 0  | 1  | 1  | 0  | 1  | 0  | 1  | 1  | 1  | 0  | 1  | 0    | 1  | 1  | 1  | 1  | 0  | 0  | 0  | 1  | 1  | 0  | 1  | NA | NA | 0  | NA | NA | 1  | 1  | 1  | 1  | 1  | NA       | 12       | 62997466 | 62997549 |
| hsa-mir-548c   | 7    |    | 1 | 1 | 0 | 1  | 1 | 1  | 1  | 0  | 0  | 0  | 0  | 0  | 0  | 0  | 0  | 0  | 0  | 0  | 0  | 0  | 0  | 0    | 0  | 0  | 0  | 0  | 0  | 0  | 0  | 0  | 0  | 0  | NA | NA | 0  | NA | NA | 0  | 0  | 0  | 0  | 0  | NA | 12       | 65016289 | 65016385 |          |
| hsa-mir-548z   | 7    |    | 1 | 1 | 0 | 1  | 1 | 1  | 1  | 0  | 0  | 0  | 0  | 0  | 0  | 0  | 0  | 0  | 0  | 0  | 0  | 0  | 0  | 0    | 0  | 0  | 0  | 0  | 0  | 0  | 0  | 0  | 0  | 0  | NA | NA | 0  | NA | NA | 0  | 0  | 0  | 0  | 0  | NA | 12       | 65016289 | 65016385 |          |
| hsa-mir-1279   | NO   | 14 | 0 | 0 | 0 | 0  | 0 | 0  | 0  | 0  | 0  | 0  | 0  | 0  | 0  | -1 | 0  | 0  | 0  | 1  | 1  | 0  | 0  | 0    | 0  | 0  | 0  | 0  | 0  | 0  | 0  | 0  | 0  | NA | 0  | 0  | NA | 0  | 0  | NA | NA | NA | NA | -1 | NA | 12       | 69666937 | 69666998 |          |
| hsa-mir-3913-1 | 9    |    | 1 | 0 | 0 | -1 | 1 | -1 | -1 | 0  | 1  | 0  | 0  | -1 | -1 | 0  | 0  | 0  | 0  | 0  | 0  | 0  | 0  | 0    | 0  | 0  | 0  | 0  | 0  | 1  | 0  | 0  | 0  | NA | 0  | 0  | NA | 0  | 0  | NA | NA | NA | NA | -1 | NA | 12       | 69978502 | 69978603 |          |
| hsa-mir-3913-2 | 9    |    | 1 | 0 | 0 | -1 | 1 | -1 | -1 | 0  | 1  | -1 | 0  | -1 | -1 | 0  | 0  | 0  | 0  | 0  | 0  | -1 | 0  | 0    | 0  | -1 | 0  | 0  | 0  | -1 | 0  | 0  | 0  | NA | 0  | 0  | NA | 0  | 0  | NA | NA | NA | NA | -1 | NA | 12       | 69978503 | 69978602 |          |
| hsa-mir-1252   | 2    |    | 1 | 1 | 1 | 1  | 1 | 1  | 0  | 0  | 1  | 0  | 0  | 0  | 0  | 0  | 0  | 0  | 0  | 0  | 1  | -1 | -1 | 0    | 1  | 0  | -1 | -1 | 0  | 0  | 0  | 0  | 0  | 0  | NA | 0  | 0  | NA | 0  | 0  | NA | NA | NA | NA | -1 | NA       | 12       | 79813037 | 79813101 |
| hsa-mir-617    | 9    |    | 1 | 1 | 1 | 1  | 1 | -1 | -1 | 0  | 0  | 0  | 0  | 0  | 0  | 0  | 0  | 0  | 0  | 0  | 0  | 0  | 0  | 0    | 0  | 0  | 0  | 0  | 0  | 0  | -1 | 0  | 0  | NA | 0  | 0  | NA | 0  | 0  | NA | NA | NA | NA | -1 | NA | 12       | 81226312 | 81226408 |          |
| hsa-mir-618    | 7    |    | 1 | 1 | 1 | 1  | 1 | 1  | 1  | -1 | -1 | -1 | -1 | 0  | -1 | -1 | 0  | -1 | -1 | -1 | -1 | -1 | -1 | -1   | -1 | -1 | -1 | -1 | -1 | -1 | -1 | -1 | -1 | NA | 0  | 0  | NA | 0  | 0  | NA | NA | NA | NA | -1 | NA | 12       | 81329515 | 81329612 |          |
| hsa-mir-4699   | 7    |    | 1 | 1 | 1 | 1  | 1 | 1  | 1  | 0  | 0  | 0  | 0  | 0  | 0  | 0  | 0  | 0  | 0  | 0  | 0  | 0  | 0  | 0    | 0  | 0  | 0  | 0  | 0  | 0  | -1 | 0  | 0  | NA | 0  | 0  | NA | 0  | 0  | NA | NA | NA | NA | -1 | NA | 12       | 81552167 | 81552240 |          |
| hsa-mir-5700   | 8    |    | 1 | 1 | 0 | -1 | 0 | 1  | -1 | 0  | 0  | 0  | -1 | -1 | 0  | 0  | 0  | 0  | 0  | 0  | 0  | 0  | 0  | 0    | 0  | 0  | 0  | 0  | 0  | 0  | 0  | 0  | 0  | NA | -1 | 1  | NA | -1 | 0  | NA | NA | NA | NA | -1 | NA | 12       | 94955565 | 94955635 |          |
| hsa-mir-492    | 0    |    | 1 | 1 | 1 | 1  | 1 | 1  | 1  | 1  | 1  | 1  | 1  | 0  | 0  | 1  | 1  | 1  | -1 | -1 | 0  | 1  | 0  | 1    | 1  | 0  | -1 | -1 | 1  | -1 | -1 | 1  | 1  | 1  | NA | -1 | 1  | NA | -1 | 0  | NA | NA | NA | NA | -1 | NA       | 12       | 95228174 | 95228289 |
| hsa-mir-331    | 1    |    | 1 | 1 | 0 | 1  | 1 | 1  | 1  | 0  | 1  | 1  | 1  | 1  | 1  | 1  | 1  | 1  | 1  | 1  | 0  | 1  | 1  | 0    | 1  | 1  | 1  | 1  | 1  | 1  | 0  | 1  | 1  | 1  | 0  | NA | NA | 0  | NA | NA | 0  | 0  | 0  | 0  | 0  | NA       | 12       | 95702196 | 95702289 |
| hsa-mir-3685   | 5    |    | 1 | 1 | 0 | 1  | 1 | 1  | 1  | 0  | 1  | 1  | 0  | 0  | 0  | 0  | -1 | -1 | 0  | 0  | 0  | 0  | 0  | 0    | 0  | 0  | 0  | 0  | 0  | 0  | 0  | 0  | 0  | 1  | NA | NA | 0  | NA | NA | 0  | 0  | 0  | 0  | -1 | NA | 12       | 95703699 | 95703760 |          |
| hsa-mir-1251   | 0    |    | 1 | 1 | 1 | 1  | 1 | 1  | 1  | 1  | 1  | 1  | 1  | 1  | 1  | 1  | 1  | 1  | 1  | 1  | 1  | 1  | 1  | 1    | 1  | 1  | 1  | 1  | 1  | 1  | 1  | 1  | 1  | 1  | 1  | NA | NA | 0  | NA | NA | 0  | 0  | 0  | 0  | -1 | NA       | 12       | 97885687 | 97885756 |
| hsa-mir-135a-2 | CONS |    | 1 | 1 | 1 | 1  | 1 | 1  | 1  | 1  | 1  | 1  | 1  | 1  | 1  | 1  | 1  | 1  | 1  | 1  | 1  | 1  | 1  | 1    | 1  | 1  | 1  | 1  | 1  | 1  | 1  | 1  | 1  | 1  | 1  | NA | NA | 0  | NA | NA | 0  | 0  | 0  | 0  | 1  | NA       | 12       | 97957590 | 97957689 |
| hsa-mir-4495   | 7    |    | 1 | 1 | 1 | 1  | 1 | -1 | 1  | 0  | 0  | 0  | 0  | 0  | 0  | 0  | 0  | 0  | 0  | 0  | 0  | 0  | 0  | 0    | 0  | 0  | 0  | 0  | 0  | 0  | 0  | 0  | 0  | 0  | NA | 0  | 0  | NA | 0  | 0  | NA | NA | NA | NA | -1 | NA       | 12       | 98332834 | 98332899 |
| hsa-mir-4303   | 7    |    | 1 | 1 | 1 | 1  | 1 | 1  | 1  | -1 | 1  | 0  | 0  | 0  | 0  | 0  | 0  | -1 | 0  | -1 | -1 | -1 | -1 | -1</ |    |    |    |    |    |    |    |    |    |    |    |    |    |    |    |    |    |    |    |    |    |          |          |          |          |



|                |   |   |   |   |    |   |   |    |    |    |    |    |    |    |    |    |    |    |   |    |    |    |    |    |    |    |    |    |    |    |    |    |    |    |    |    |    |    |    |   |   |    |    |           |           |           |           |
|----------------|---|---|---|---|----|---|---|----|----|----|----|----|----|----|----|----|----|----|---|----|----|----|----|----|----|----|----|----|----|----|----|----|----|----|----|----|----|----|----|---|---|----|----|-----------|-----------|-----------|-----------|
| hsa-mir-665    | 1 | 1 | 1 | 1 | 1  | 1 | 0 | 0  | 1  | 1  | 1  | 1  | 1  | 1  | 1  | -1 | 0  | 0  | 1 | 0  | 1  | 0  | 0  | 0  | 0  | 0  | 0  | 0  | 0  | 1  | 1  | 0  | 0  | NA | NA | 0  | NA | NA | 0  | 0 | 0 | 0  | NA | 14        | 101341370 | 101341441 |           |
| hsa-mir-431    | 1 | 1 | 1 | 1 | 1  | 1 | 1 | 1  | 1  | 0  | 1  | 1  | 1  | 1  | 1  | 1  | 1  | 0  | 0 | 1  | 1  | 0  | 1  | 1  | 1  | 0  | 0  | 0  | 0  | 0  | 1  | 1  | 1  | 0  | NA | NA | 0  | NA | NA | 0 | 0 | 0  | 0  | NA        | 14        | 101347344 | 101347457 |
| hsa-mir-433    | 1 | 1 | 1 | 1 | 1  | 1 | 1 | 0  | 1  | 1  | 1  | 1  | 1  | 1  | 1  | 1  | 0  | 0  | 1 | 1  | 1  | 1  | 1  | 1  | 0  | 0  | 0  | 0  | 0  | 1  | 0  | 1  | 0  | NA | NA | 0  | NA | NA | 0  | 0 | 0 | 0  | NA | 14        | 101348223 | 101348315 |           |
| hsa-mir-127    | 1 | 1 | 1 | 1 | 1  | 1 | 1 | 1  | 0  | 1  | 1  | 1  | 1  | 1  | 1  | 1  | 1  | 0  | 1 | 1  | 1  | 1  | 1  | 1  | 1  | 0  | 0  | 0  | 0  | 1  | 1  | 0  | 0  | NA | NA | 0  | NA | NA | 0  | 0 | 0 | 0  | NA | 14        | 101349316 | 101349412 |           |
| hsa-mir-432    | 1 | 1 | 1 | 1 | 1  | 1 | 1 | 1  | 0  | 1  | 1  | 1  | 1  | 1  | 1  | 1  | 0  | 0  | 1 | 1  | 1  | 1  | 1  | 1  | 1  | 0  | 0  | 0  | 0  | 1  | 1  | 0  | 0  | NA | NA | 0  | NA | NA | 0  | 0 | 0 | 0  | NA | 14        | 101350820 | 101350913 |           |
| hsa-mir-136    | 1 | 1 | 1 | 1 | 1  | 1 | 0 | 0  | 1  | 1  | 1  | 1  | 1  | 1  | 1  | 1  | 0  | 0  | 1 | 1  | 1  | 1  | 1  | 1  | 1  | 0  | 0  | 0  | 0  | 1  | 1  | 1  | 0  | NA | NA | 0  | NA | NA | 0  | 0 | 0 | 0  | NA | 14        | 101351039 | 101351120 |           |
| hsa-mir-370    | 2 | 1 | 1 | 1 | 1  | 1 | 1 | 0  | 1  | 1  | 1  | 1  | 1  | 1  | 1  | 1  | 1  | 0  | 1 | 1  | 1  | 1  | 1  | 1  | 0  | 0  | 0  | 0  | -1 | 0  | 0  | 0  | 0  | NA | NA | 0  | NA | NA | 0  | 0 | 0 | 0  | NA | 14        | 101377476 | 101377550 |           |
| hsa-mir-379    | 1 | 1 | 1 | 1 | 1  | 1 | 1 | 1  | 1  | 1  | 1  | 1  | 1  | 1  | 1  | 1  | 1  | 0  | 1 | 1  | 1  | 1  | 1  | 1  | 1  | 0  | 0  | 0  | 1  | 1  | 1  | 1  | 0  | NA | NA | 0  | NA | NA | 0  | 0 | 0 | 0  | NA | 14        | 101488403 | 101488469 |           |
| hsa-mir-411    | 1 | 1 | 1 | 1 | 1  | 1 | 1 | 1  | 1  | 1  | 1  | 1  | 1  | 1  | 1  | 1  | 1  | 0  | 1 | 1  | 1  | 1  | 1  | 1  | -1 | 0  | 0  | 0  | 1  | 1  | 1  | 1  | 0  | NA | NA | 0  | NA | NA | 0  | 0 | 0 | 0  | NA | 14        | 101489662 | 101489757 |           |
| hsa-mir-299    | 1 | 1 | 1 | 1 | 1  | 1 | 1 | -1 | 1  | 1  | 1  | 1  | 1  | 1  | 1  | 1  | 1  | 1  | 0 | 1  | 1  | 1  | 1  | 1  | 1  | 0  | 0  | 0  | -1 | 1  | 1  | 0  | 0  | NA | NA | 0  | NA | NA | 0  | 0 | 0 | 0  | NA | 14        | 101490131 | 101490193 |           |
| hsa-mir-380    | 1 | 1 | 1 | 1 | 1  | 1 | 1 | 1  | 0  | 1  | 1  | 1  | 1  | 1  | 1  | 1  | 0  | -1 | 1 | 1  | 1  | 1  | 1  | 1  | 0  | 0  | 0  | 0  | 1  | 1  | 1  | 1  | 0  | NA | NA | 0  | NA | NA | 0  | 0 | 0 | 0  | NA | 14        | 101491354 | 101491414 |           |
| hsa-mir-1197   | 1 | 1 | 1 | 1 | 1  | 1 | 1 | 1  | 1  | 1  | 1  | 1  | 1  | 1  | 1  | 1  | 1  | 0  | 1 | 1  | 1  | 1  | 1  | 1  | 0  | 0  | 0  | 0  | 1  | 1  | 1  | -1 | 0  | NA | NA | 0  | NA | NA | 0  | 0 | 0 | 0  | NA | 14        | 101491901 | 101491988 |           |
| hsa-mir-323a   | 1 | 1 | 1 | 1 | 1  | 1 | 1 | 1  | 1  | 1  | 1  | 1  | 1  | 1  | 1  | 1  | 1  | 0  | 1 | 1  | 1  | 1  | 1  | 1  | 0  | 0  | 0  | 0  | 1  | 1  | 1  | -1 | 0  | NA | NA | 0  | NA | NA | 0  | 0 | 0 | 0  | NA | 14        | 101492069 | 101492154 |           |
| hsa-mir-758    | 1 | 1 | 1 | 1 | 1  | 1 | 1 | 0  | 1  | 1  | 1  | 1  | 1  | 1  | 1  | 1  | 1  | 0  | 1 | 1  | 1  | 1  | 1  | 1  | 0  | 0  | 0  | 0  | 1  | 1  | 1  | -1 | 0  | NA | NA | 0  | NA | NA | 0  | 0 | 0 | 0  | NA | 14        | 101492357 | 101492444 |           |
| hsa-mir-329-1  | 1 | 1 | 1 | 1 | 1  | 1 | 1 | 1  | 1  | 1  | 1  | 1  | 1  | 1  | 1  | 1  | -1 | 0  | 1 | 1  | 1  | 1  | 1  | 1  | 0  | 0  | 0  | 0  | 1  | 1  | 1  | -1 | 0  | NA | NA | 0  | NA | NA | 0  | 0 | 0 | 0  | NA | 14        | 101493122 | 101493201 |           |
| hsa-mir-329-2  | 1 | 1 | 1 | 1 | 1  | 1 | 1 | 1  | 1  | 1  | -1 | 1  | 1  | -1 | 1  | 0  | 1  | -1 | 0 | 1  | 1  | -1 | 1  | 1  | -1 | 0  | 0  | 0  | 1  | 1  | 1  | 1  | 0  | NA | NA | 0  | NA | NA | 0  | 0 | 0 | 0  | NA | 14        | 101493437 | 101493520 |           |
| hsa-mir-494    | 1 | 1 | 1 | 1 | -1 | 1 | 1 | 1  | 1  | 1  | -1 | 1  | 1  | 1  | 1  | 1  | -1 | 0  | 1 | 1  | 1  | 1  | -1 | 1  | 0  | -1 | 0  | 0  | -1 | 1  | 1  | -1 | 0  | NA | NA | 0  | NA | NA | 0  | 0 | 0 | 0  | NA | 14        | 101495971 | 101496051 |           |
| hsa-mir-1193   | 2 | 1 | 1 | 1 | 1  | 1 | 1 | 1  | 1  | 1  | 1  | 1  | 0  | 1  | 0  | 1  | 1  | 0  | 1 | -1 | 1  | 1  | 1  | -1 | 0  | 0  | -1 | -1 | 1  | 1  | 0  | 0  | NA | NA | 0  | NA | NA | 0  | 0  | 0 | 0 | NA | 14 | 101496389 | 101496466 |           |           |
| hsa-mir-543    | 1 | 1 | 1 | 1 | 1  | 1 | 1 | -1 | 1  | 1  | 1  | 1  | 1  | 1  | 1  | -1 | 1  | -1 | 0 | 1  | 1  | 1  | 1  | 1  | 0  | 0  | 0  | 0  | 1  | 1  | 1  | -1 | 0  | NA | NA | 0  | NA | NA | 0  | 0 | 0 | 0  | NA | 14        | 101498324 | 101498401 |           |
| hsa-mir-495    | 1 | 1 | 1 | 1 | 1  | 1 | 1 | -1 | 1  | 1  | 1  | 1  | 1  | 1  | 1  | 1  | 1  | 0  | 1 | 1  | 1  | 1  | 1  | 1  | 0  | 0  | 0  | 0  | 1  | 1  | 1  | 1  | 0  | NA | NA | 0  | NA | NA | 0  | 0 | 0 | 0  | NA | 14        | 101500092 | 101500173 |           |
| hsa-mir-376c   | 1 | 1 | 1 | 1 | 1  | 1 | 1 | 1  | 1  | 1  | 1  | 1  | -1 | -1 | 1  | 1  | -1 | 0  | 1 | 1  | 1  | 1  | 1  | -1 | -1 | 0  | -1 | 1  | 1  | 1  | 1  | 0  | NA | NA | 0  | NA | NA | 0  | 0  | 0 | 0 | NA | 14 | 101506027 | 101506092 |           |           |
| hsa-mir-376a-2 | 1 | 1 | 1 | 1 | 1  | 1 | 1 | -1 | 1  | 0  | 0  | 0  | 1  | -1 | 1  | 1  | 1  | 0  | 0 | 1  | 1  | 1  | -1 | 1  | 1  | 0  | 0  | 0  | 1  | 1  | 1  | 1  | 0  | NA | NA | 0  | NA | NA | 0  | 0 | 0 | 0  | NA | 14        | 101506406 | 101506485 |           |
| hsa-mir-654    | 1 | 1 | 1 | 1 | 1  | 1 | 1 | 1  | -1 | 0  | 1  | 1  | 1  | 1  | -1 | 0  | 0  | 1  | 0 | 1  | 1  | 1  | -1 | 1  | 0  | -1 | 0  | 1  | 1  | 1  | 0  | 0  | NA | NA | 0  | NA | NA | 0  | 0  | 0 | 0 | NA | 14 | 101506556 | 101506636 |           |           |
| hsa-mir-376b   | 1 | 1 | 1 | 1 | 1  | 1 | 1 | 1  | 1  | 1  | 1  | 1  | 1  | 1  | 1  | -1 | 1  | 0  | 1 | 1  | 1  | 1  | 1  | 1  | 0  | 0  | 0  | 1  | 1  | 1  | -1 | 0  | NA | NA | 0  | NA | NA | 0  | 0  | 0 | 0 | NA | 14 | 101506773 | 101506872 |           |           |
| hsa-mir-376a-1 | 1 | 1 | 1 | 1 | 1  | 1 | 1 | 1  | 1  | -1 | 1  | 1  | 1  | 1  | 1  | 1  | 1  | 0  | 1 | 1  | 1  | 1  | 1  | 1  | 0  | 0  | 0  | 0  | 1  | 1  | 1  | 1  | 0  | NA | NA | 0  | NA | NA | 0  | 0 | 0 | 0  | NA | 14        | 101507119 | 101507186 |           |
| hsa-mir-300    | 1 | 1 | 1 | 1 | 1  | 1 | 1 | -1 | -1 | -1 | -1 | -1 | -1 | -1 | -1 | -1 | -1 | -1 | 0 | -1 | -1 | -1 | -1 | -1 | 0  | -1 | -1 | 1  | 1  | 1  | 0  | 0  | NA | NA | 0  | NA | NA | 0  | 0  | 0 | 0 | NA | 14 | 101507700 | 101507782 |           |           |
| hsa-mir-1185-1 | 1 | 1 | 1 | 1 | 1  | 1 | 1 | 1  | 1  | -1 | 0  | 0  | -1 | 1  | 1  | -1 | 1  | 1  | 0 | 1  | 1  | 1  | 1  | -1 | -1 | 0  | -1 | -1 | 1  | 1  | 1  | 0  | NA | NA | 0  | NA | NA | 0  | 0  | 0 | 0 | NA | 14 | 101509314 | 101509399 |           |           |
| hsa-mir-1185-2 | 1 | 1 | 1 | 1 | 1  | 1 | 1 | 1  | -1 | 1  | 1  | 1  | 0  | 1  | 1  | -1 | -1 | 1  | 0 | 1  | 1  | 0  | 1  | 0  | -1 | -1 | 0  | 0  | 1  | 1  | 1  | 0  | NA | NA | 0  | NA | NA | 0  | 0  | 0 | 0 | NA | 14 | 101510535 | 101510620 |           |           |
| hsa-mir-381    | 1 | 1 | 1 | 1 | 1  | 1 | 1 | 1  | 1  | 1  | 1  | 1  | 1  | 1  | 1  | 1  | 1  | 0  | 1 | 1  | 1  | 1  | 1  | 0  | 0  | 0  | 0  | 1  | 1  | 1  | 1  | 0  | NA | NA | 0  | NA | NA | 0  | 0  | 0 | 0 | NA | 14 | 101512257 | 101512331 |           |           |
| hsa-mir-487b   | 1 | 1 | 1 | 1 | 1  | 1 | 1 | 1  | 1  | 1  | -1 | 1  | 1  | 1  | 1  | 1  | -1 | 0  | 1 | 1  | 1  | 1  | 1  | 0  | 0  | 0  | 0  | 1  | -1 | 1  | 1  | 0  | NA | NA | 0  | NA | NA | 0  | 0  | 0 | 0 | NA | 14 | 101512792 | 101512875 |           |           |
| hsa-mir-539    | 1 | 1 | 1 | 1 | 1  | 1 | 1 | 1  | 1  | -1 | 1  | 1  | 1  | 1  | 1  | 1  | 1  | -1 | 0 | 1  | 1  | 1  | 1  | 1  | -1 | 0  | 0  | 0  | -1 | 1  | 1  | 1  | 0  | NA | NA | 0  | NA | NA | 0  | 0 | 0 | 0  | NA | 14        | 101513658 | 101513735 |           |
| hsa-mir-889    | 1 | 1 | 1 | 1 | 1  | 1 | 1 | 1  | 1  | -1 | 1  | -1 | -1 | 1  | 1  | 1  | -1 | -1 | 0 | 1  | 1  | 1  | 1  | 1  | 0  | -1 | 1  | 1  | 0  | 1  | 0  | 0  | NA | NA | 0  | NA | NA | 0  | 0  | 0 | 0 | NA | 14 | 101514238 | 101514316 |           |           |
| hsa-mir-544a   | 1 | 1 | 1 | 1 | 1  | 1 | 1 | 1  | 0  | 1  | 1  | 1  | 1  | 1  | 1  | -1 | 1  | 0  | 0 | 1  | 1  | 1  | 1  | 1  | 0  | 0  | 0  | 0  | 1  | 1  | 1  | 1  | 0  | NA | NA | 0  | NA | NA | 0  | 0 | 0 | 0  | NA | 14        | 101514995 | 101515085 |           |
| hsa-mir-655    | 1 | 1 | 1 | 1 | 1  | 1 | 0 | 1  | 1  | 1  | 1  | 1  | 1  | 1  | 1  | -1 | 0  | 1  | 1 | 1  | 1  | 1  | 1  | -1 | 0  | -1 | 0  | 0  | 1  | 1  | 1  | 1  | 0  | NA | NA | 0  | NA | NA | 0  | 0 | 0 | 0  | NA | 14        | 101515887 | 101515983 |           |
| hsa-mir-487a   | 1 | 1 | 1 | 1 | 1  | 1 | 1 | 1  | -1 | 1  | 0  | 1  | 1  | 1  | 1  | 1  | 1  | 0  | 1 | 1  | 1  | 1  | 1  | 1  | 0  | 0  | 0  | 0  | 1  | 1  | 1  | 1  | 0  | NA | NA | 0  | NA | NA | 0  | 0 | 0 | 0  | NA | 14        | 101518783 | 101518862 |           |
| hsa-mir-382    | 1 | 1 | 1 | 1 | 1  | 1 | 1 | 1  | 1  | 1  | 1  | 1  | 0  | 1  | -1 | 1  | 1  | -1 | 0 | 1  | 1  | 1  | 1  | 1  | 0  | 0  | 0  | 0  | -1 | 1  | 1  | 1  | 0  | NA | NA | 0  | NA | NA | 0  | 0 | 0 | 0  | NA | 14        | 101520643 | 101520718 |           |
| hsa-mir-134    | 2 | 1 | 1 | 1 | 1  | 1 | 1 | 1  | 1  | 1  | -1 | 1  | 1  | -1 | 1  | -1 | 1  | 0  | 1 | 1  | 1  | 1  | 1  | -1 | 0  | -1 | -1 | -1 | -1 | 0  | 0  | 0  | 0  | NA | NA | 0  | NA | NA | 0  | 0 | 0 | 0  | NA | 14        | 101521024 | 101521096 |           |
| hsa-mir-668    | 2 | 1 | 1 | 1 | 1  | 1 | 1 | 1  | 1  | 1  | 0  | 1  | 1  | 1  | 1  | 1  | 1  | -1 | 1 | 0  | 1  | -1 | -1 | 1  | 0  | 0  | -1 | -1 | -1 | -1 | 0  | 0  | NA | NA | 0  | NA | NA | 0  | 0  | 0 | 0 | NA | 14 | 101521595 | 101521660 |           |           |
| hsa-mir-485    | 1 | 1 | 1 | 1 | 1  | 1 | 1 | 1  | 1  | 1  | 1  | 1  | 1  | 1  | 1  | -1 | 1  | 1  | 1 | 1  | 1  | 1  | 1  | 0  | 0  | 0  | 0  | 1  | 1  | 1  | 1  | 1  | 0  | NA | NA | 0  | NA | NA | 0  | 0 | 0 | 0  | NA | 14        | 101521756 | 101521828 |           |
| hsa-mir-323b   | 1 | 1 | 1 | 1 | 1  | 1 | 1 | 1  | 0  | 1  | -1 | 1  | 1  | 1  | 1  | 1  | -1 | 1  | 1 | 1  | 1  | 1  | 1  | 0  | -1 | 0  | 0  | 0  | 1  | 1  | 1  | 0  | 0  | NA | NA | 0  | NA | NA | 0  | 0 | 0 | 0  | NA | 14        | 101522556 | 1015226   |           |

[illegible]





[illegible]

[illegible]

[illegible]



[illegible]

|               |   |  |   |   |   |   |   |   |    |    |    |    |   |   |   |    |   |    |   |   |   |   |   |   |    |    |   |    |   |    |   |    |    |    |    |    |  |  |  |  |  |  |  |  |  |  |  |  |  |  |  |  |  |  |  |  |  |  |  |  |  |  |  |  |  |  |  |  |  |  |  |  |  |  |  |  |  |  |  |  |  |  |  |  |  |  |  |  |  |  |  |  |  |  |  |  |  |  |  |  |  |  |  |  |  |  |  |  |  |  |  |  |  |  |  |  |  |  |  |  |  |  |  |  |  |  |  |  |  |  |  |  |  |  |  |  |  |  |  |  |  |  |  |  |  |  |  |  |  |  |  |  |  |  |  |  |  |  |  |  |  |  |  |  |  |  |  |  |  |  |  |  |  |  |  |  |  |  |  |  |  |  |  |  |  |  |  |  |  |  |  |  |  |  |  |  |  |  |  |  |  |  |  |  |  |  |  |  |  |  |  |  |  |  |  |  |  |  |  |  |  |  |  |  |  |  |  |  |  |  |  |  |  |  |  |  |  |  |  |  |  |  |  |  |  |  |  |  |  |  |  |  |  |  |  |  |  |  |  |  |  |  |  |  |  |  |  |  |  |  |  |  |  |  |  |  |  |  |  |  |  |  |  |  |  |  |  |  |  |  |  |  |  |  |  |  |  |  |  |  |  |  |  |  |  |  |  |  |  |  |  |  |  |  |  |  |  |  |  |  |  |  |  |  |  |  |  |  |  |  |  |  |  |  |  |  |  |  |  |  |  |  |  |  |  |  |  |  |  |  |  |  |  |  |  |  |  |  |  |  |  |  |  |  |  |  |  |  |  |  |  |  |  |  |  |  |  |  |  |  |  |  |  |  |  |  |  |  |  |  |  |  |  |  |  |  |  |  |  |  |  |  |  |  |  |  |  |  |  |  |  |  |  |  |  |  |  |  |  |  |  |  |  |  |  |  |  |  |  |  |  |  |  |  |  |  |  |  |  |  |  |  |  |  |  |  |  |  |  |  |  |  |  |  |  |  |  |  |  |  |  |  |  |  |  |  |  |  |  |  |  |  |  |  |  |  |  |  |  |  |  |  |  |  |  |  |  |  |  |  |  |  |  |  |  |  |  |  |  |  |  |  |  |  |  |  |  |  |  |  |  |  |  |  |  |  |  |  |  |  |  |  |  |  |  |  |  |  |  |  |  |  |  |  |  |  |  |  |  |  |  |  |  |  |  |  |  |  |  |  |  |  |  |  |  |  |  |  |  |  |  |  |  |  |  |  |  |  |  |  |  |  |  |  |  |  |  |  |  |  |  |  |  |  |  |  |  |  |  |  |  |  |  |  |  |  |  |  |  |  |  |  |  |  |  |  |  |  |  |  |  |  |  |  |  |  |  |  |  |  |  |  |  |  |  |  |  |  |  |  |  |  |  |  |  |  |  |  |  |  |  |  |  |  |  |  |  |  |  |  |  |  |  |  |  |  |  |  |  |  |  |  |  |  |  |  |  |  |  |  |  |  |  |  |  |  |  |  |  |  |  |  |  |  |  |  |  |  |  |  |  |  |  |  |  |  |  |  |  |  |  |  |  |  |  |  |  |  |  |  |  |  |  |  |  |  |  |  |  |  |  |  |  |  |  |  |  |  |  |  |  |  |  |  |  |  |  |  |  |  |  |  |  |  |  |  |  |  |  |  |  |  |  |  |  |  |  |  |  |  |  |  |  |  |  |  |  |  |  |  |  |  |  |  |  |  |  |  |  |  |  |  |  |  |  |  |  |  |  |  |  |  |  |  |  |  |  |  |  |  |  |  |  |  |  |  |  |  |  |  |  |  |  |  |  |  |  |  |  |  |  |  |  |  |  |  |  |  |  |  |  |  |  |  |  |  |  |  |  |  |  |  |  |  |  |  |  |  |  |  |  |  |  |  |  |  |  |  |  |  |  |  |  |  |  |  |  |  |  |  |  |  |  |  |  |  |  |  |  |  |  |  |  |  |  |  |  |  |  |  |  |  |  |  |  |  |  |  |  |  |  |  |  |  |  |  |  |  |  |  |  |  |  |  |  |  |  |  |  |  |  |  |  |  |  |  |  |  |  |  |  |  |  |  |  |  |  |  |  |  |  |  |  |  |  |  |  |  |  |  |  |  |  |  |  |  |  |  |  |  |  |  |  |  |  |  |  |  |  |  |  |  |  |  |  |  |  |  |  |  |  |  |  |  |  |  |  |  |  |  |  |  |  |  |  |  |  |  |  |  |  |  |  |  |  |  |  |  |  |  |  |  |  |  |  |  |  |  |  |  |  |  |  |  |  |  |  |  |  |  |  |  |  |  |  |  |  |  |  |  |  |  |  |  |  |  |  |  |  |  |  |  |  |  |  |  |  |  |  |  |  |  |  |  |  |  |  |  |  |  |  |  |  |  |  |  |  |  |  |  |  |  |  |  |  |  |  |  |  |  |  |  |  |  |  |  |  |  |  |  |  |  |  |  |  |  |  |  |  |  |  |  |  |  |  |  |  |  |  |  |  |  |  |  |  |  |  |  |  |  |  |  |  |  |  |  |  |  |  |  |  |  |  |  |  |  |  |  |  |  |  |  |  |  |  |  |  |  |  |  |  |  |  |  |  |  |  |  |  |  |  |  |  |  |  |  |  |  |  |  |  |  |  |  |  |  |  |  |  |  |  |  |  |  |  |  |  |  |  |  |  |  |  |  |  |  |  |  |  |  |  |  |  |  |  |  |  |  |  |  |  |  |  |  |  |  |  |  |  |  |  |  |  |  |  |  |  |  |  |  |  |  |  |  |  |  |  |  |  |  |  |  |  |  |  |  |  |  |  |  |  |  |  |  |  |  |  |  |  |  |  |  |  |  |  |  |  |  |  |  |  |  |  |  |  |  |  |  |  |  |  |  |  |  |  |  |  |  |  |  |  |  |  |  |  |  |  |  |  |  |  |  |  |  |  |  |  |  |  |  |  |  |  |  |  |  |  |  |  |  |  |  |  |  |  |  |  |  |  |  |  |  |  |  |  |  |  |  |  |  |  |  |  |  |  |  |  |  |
|---------------|---|--|---|---|---|---|---|---|----|----|----|----|---|---|---|----|---|----|---|---|---|---|---|---|----|----|---|----|---|----|---|----|----|----|----|----|--|--|--|--|--|--|--|--|--|--|--|--|--|--|--|--|--|--|--|--|--|--|--|--|--|--|--|--|--|--|--|--|--|--|--|--|--|--|--|--|--|--|--|--|--|--|--|--|--|--|--|--|--|--|--|--|--|--|--|--|--|--|--|--|--|--|--|--|--|--|--|--|--|--|--|--|--|--|--|--|--|--|--|--|--|--|--|--|--|--|--|--|--|--|--|--|--|--|--|--|--|--|--|--|--|--|--|--|--|--|--|--|--|--|--|--|--|--|--|--|--|--|--|--|--|--|--|--|--|--|--|--|--|--|--|--|--|--|--|--|--|--|--|--|--|--|--|--|--|--|--|--|--|--|--|--|--|--|--|--|--|--|--|--|--|--|--|--|--|--|--|--|--|--|--|--|--|--|--|--|--|--|--|--|--|--|--|--|--|--|--|--|--|--|--|--|--|--|--|--|--|--|--|--|--|--|--|--|--|--|--|--|--|--|--|--|--|--|--|--|--|--|--|--|--|--|--|--|--|--|--|--|--|--|--|--|--|--|--|--|--|--|--|--|--|--|--|--|--|--|--|--|--|--|--|--|--|--|--|--|--|--|--|--|--|--|--|--|--|--|--|--|--|--|--|--|--|--|--|--|--|--|--|--|--|--|--|--|--|--|--|--|--|--|--|--|--|--|--|--|--|--|--|--|--|--|--|--|--|--|--|--|--|--|--|--|--|--|--|--|--|--|--|--|--|--|--|--|--|--|--|--|--|--|--|--|--|--|--|--|--|--|--|--|--|--|--|--|--|--|--|--|--|--|--|--|--|--|--|--|--|--|--|--|--|--|--|--|--|--|--|--|--|--|--|--|--|--|--|--|--|--|--|--|--|--|--|--|--|--|--|--|--|--|--|--|--|--|--|--|--|--|--|--|--|--|--|--|--|--|--|--|--|--|--|--|--|--|--|--|--|--|--|--|--|--|--|--|--|--|--|--|--|--|--|--|--|--|--|--|--|--|--|--|--|--|--|--|--|--|--|--|--|--|--|--|--|--|--|--|--|--|--|--|--|--|--|--|--|--|--|--|--|--|--|--|--|--|--|--|--|--|--|--|--|--|--|--|--|--|--|--|--|--|--|--|--|--|--|--|--|--|--|--|--|--|--|--|--|--|--|--|--|--|--|--|--|--|--|--|--|--|--|--|--|--|--|--|--|--|--|--|--|--|--|--|--|--|--|--|--|--|--|--|--|--|--|--|--|--|--|--|--|--|--|--|--|--|--|--|--|--|--|--|--|--|--|--|--|--|--|--|--|--|--|--|--|--|--|--|--|--|--|--|--|--|--|--|--|--|--|--|--|--|--|--|--|--|--|--|--|--|--|--|--|--|--|--|--|--|--|--|--|--|--|--|--|--|--|--|--|--|--|--|--|--|--|--|--|--|--|--|--|--|--|--|--|--|--|--|--|--|--|--|--|--|--|--|--|--|--|--|--|--|--|--|--|--|--|--|--|--|--|--|--|--|--|--|--|--|--|--|--|--|--|--|--|--|--|--|--|--|--|--|--|--|--|--|--|--|--|--|--|--|--|--|--|--|--|--|--|--|--|--|--|--|--|--|--|--|--|--|--|--|--|--|--|--|--|--|--|--|--|--|--|--|--|--|--|--|--|--|--|--|--|--|--|--|--|--|--|--|--|--|--|--|--|--|--|--|--|--|--|--|--|--|--|--|--|--|--|--|--|--|--|--|--|--|--|--|--|--|--|--|--|--|--|--|--|--|--|--|--|--|--|--|--|--|--|--|--|--|--|--|--|--|--|--|--|--|--|--|--|--|--|--|--|--|--|--|--|--|--|--|--|--|--|--|--|--|--|--|--|--|--|--|--|--|--|--|--|--|--|--|--|--|--|--|--|--|--|--|--|--|--|--|--|--|--|--|--|--|--|--|--|--|--|--|--|--|--|--|--|--|--|--|--|--|--|--|--|--|--|--|--|--|--|--|--|--|--|--|--|--|--|--|--|--|--|--|--|--|--|--|--|--|--|--|--|--|--|--|--|--|--|--|--|--|--|--|--|--|--|--|--|--|--|--|--|--|--|--|--|--|--|--|--|--|--|--|--|--|--|--|--|--|--|--|--|--|--|--|--|--|--|--|--|--|--|--|--|--|--|--|--|--|--|--|--|--|--|--|--|--|--|--|--|--|--|--|--|--|--|--|--|--|--|--|--|--|--|--|--|--|--|--|--|--|--|--|--|--|--|--|--|--|--|--|--|--|--|--|--|--|--|--|--|--|--|--|--|--|--|--|--|--|--|--|--|--|--|--|--|--|--|--|--|--|--|--|--|--|--|--|--|--|--|--|--|--|--|--|--|--|--|--|--|--|--|--|--|--|--|--|--|--|--|--|--|--|--|--|--|--|--|--|--|--|--|--|--|--|--|--|--|--|--|--|--|--|--|--|--|--|--|--|--|--|--|--|--|--|--|--|--|--|--|--|--|--|--|--|--|--|--|--|--|--|--|--|--|--|--|--|--|--|--|--|--|--|--|--|--|--|--|--|--|--|--|--|--|--|--|--|--|--|--|--|--|--|--|--|--|--|--|--|--|--|--|--|--|--|--|--|--|--|--|--|--|--|--|--|--|--|--|--|--|--|--|--|--|--|--|--|--|--|--|--|--|--|--|--|--|--|--|--|--|--|--|--|--|--|--|--|--|--|--|--|--|--|--|--|--|--|--|--|--|--|--|--|--|--|--|--|--|--|--|--|--|--|--|--|--|--|--|--|--|--|--|--|--|--|--|--|--|--|--|--|--|--|--|--|--|--|--|--|--|--|--|--|--|--|--|--|--|--|--|--|--|--|--|--|--|--|--|--|--|--|--|--|--|--|--|--|--|--|--|--|--|--|--|--|--|--|--|--|--|--|--|--|--|--|--|--|--|--|--|--|--|--|--|--|--|--|--|--|--|--|--|--|--|--|--|--|--|--|--|--|--|--|--|--|
| hsa-mir-509-3 | 2 |  | 1 | 1 | 1 | 1 | 0 | 0 | -1 | -1 | -1 | -1 | 0 | 0 | 0 | -1 | 1 | -1 | 0 | 1 | 0 | 1 | 0 | 0 | -1 | -1 | 0 | -1 | 1 | -1 | 1 | -1 | -1 | -1 | -1 | -1 |  |  |  |  |  |  |  |  |  |  |  |  |  |  |  |  |  |  |  |  |  |  |  |  |  |  |  |  |  |  |  |  |  |  |  |  |  |  |  |  |  |  |  |  |  |  |  |  |  |  |  |  |  |  |  |  |  |  |  |  |  |  |  |  |  |  |  |  |  |  |  |  |  |  |  |  |  |  |  |  |  |  |  |  |  |  |  |  |  |  |  |  |  |  |  |  |  |  |  |  |  |  |  |  |  |  |  |  |  |  |  |  |  |  |  |  |  |  |  |  |  |  |  |  |  |  |  |  |  |  |  |  |  |  |  |  |  |  |  |  |  |  |  |  |  |  |  |  |  |  |  |  |  |  |  |  |  |  |  |  |  |  |  |  |  |  |  |  |  |  |  |  |  |  |  |  |  |  |  |  |  |  |  |  |  |  |  |  |  |  |  |  |  |  |  |  |  |  |  |  |  |  |  |  |  |  |  |  |  |  |  |  |  |  |  |  |  |  |  |  |  |  |  |  |  |  |  |  |  |  |  |  |  |  |  |  |  |  |  |  |  |  |  |  |  |  |  |  |  |  |  |  |  |  |  |  |  |  |  |  |  |  |  |  |  |  |  |  |  |  |  |  |  |  |  |  |  |  |  |  |  |  |  |  |  |  |  |  |  |  |  |  |  |  |  |  |  |  |  |  |  |  |  |  |  |  |  |  |  |  |  |  |  |  |  |  |  |  |  |  |  |  |  |  |  |  |  |  |  |  |  |  |  |  |  |  |  |  |  |  |  |  |  |  |  |  |  |  |  |  |  |  |  |  |  |  |  |  |  |  |  |  |  |  |  |  |  |  |  |  |  |  |  |  |  |  |  |  |  |  |  |  |  |  |  |  |  |  |  |  |  |  |  |  |  |  |  |  |  |  |  |  |  |  |  |  |  |  |  |  |  |  |  |  |  |  |  |  |  |  |  |  |  |  |  |  |  |  |  |  |  |  |  |  |  |  |  |  |  |  |  |  |  |  |  |  |  |  |  |  |  |  |  |  |  |  |  |  |  |  |  |  |  |  |  |  |  |  |  |  |  |  |  |  |  |  |  |  |  |  |  |  |  |  |  |  |  |  |  |  |  |  |  |  |  |  |  |  |  |  |  |  |  |  |  |  |  |  |  |  |  |  |  |  |  |  |  |  |  |  |  |  |  |  |  |  |  |  |  |  |  |  |  |  |  |  |  |  |  |  |  |  |  |  |  |  |  |  |  |  |  |  |  |  |  |  |  |  |  |  |  |  |  |  |  |  |  |  |  |  |  |  |  |  |  |  |  |  |  |  |  |  |  |  |  |  |  |  |  |  |  |  |  |  |  |  |  |  |  |  |  |  |  |  |  |  |  |  |  |  |  |  |  |  |  |  |  |  |  |  |  |  |  |  |  |  |  |  |  |  |  |  |  |  |  |  |  |  |  |  |  |  |  |  |  |  |  |  |  |  |  |  |  |  |  |  |  |  |  |  |  |  |  |  |  |  |  |  |  |  |  |  |  |  |  |  |  |  |  |  |  |  |  |  |  |  |  |  |  |  |  |  |  |  |  |  |  |  |  |  |  |  |  |  |  |  |  |  |  |  |  |  |  |  |  |  |  |  |  |  |  |  |  |  |  |  |  |  |  |  |  |  |  |  |  |  |  |  |  |  |  |  |  |  |  |  |  |  |  |  |  |  |  |  |  |  |  |  |  |  |  |  |  |  |  |  |  |  |  |  |  |  |  |  |  |  |  |  |  |  |  |  |  |  |  |  |  |  |  |  |  |  |  |  |  |  |  |  |  |  |  |  |  |  |  |  |  |  |  |  |  |  |  |  |  |  |  |  |  |  |  |  |  |  |  |  |  |  |  |  |  |  |  |  |  |  |  |  |  |  |  |  |  |  |  |  |  |  |  |  |  |  |  |  |  |  |  |  |  |  |  |  |  |  |  |  |  |  |  |  |  |  |  |  |  |  |  |  |  |  |  |  |  |  |  |  |  |  |  |  |  |  |  |  |  |  |  |  |  |  |  |  |  |  |  |  |  |  |  |  |  |  |  |  |  |  |  |  |  |  |  |  |  |  |  |  |  |  |  |  |  |  |  |  |  |  |  |  |  |  |  |  |  |  |  |  |  |  |  |  |  |  |  |  |  |  |  |  |  |  |  |  |  |  |  |  |  |  |  |  |  |  |  |  |  |  |  |  |  |  |  |  |  |  |  |  |  |  |  |  |  |  |  |  |  |  |  |  |  |  |  |  |  |  |  |  |  |  |  |  |  |  |  |  |  |  |  |  |  |  |  |  |  |  |  |  |  |  |  |  |  |  |  |  |  |  |  |  |  |  |  |  |  |  |  |  |  |  |  |  |  |  |  |  |  |  |  |  |  |  |  |  |  |  |  |  |  |  |  |  |  |  |  |  |  |  |  |  |  |  |  |  |  |  |  |  |  |  |  |  |  |  |  |  |  |  |  |  |  |  |  |  |  |  |  |  |  |  |  |  |  |  |  |  |  |  |  |  |  |  |  |  |  |  |  |  |  |  |  |  |  |  |  |  |  |  |  |  |  |  |  |  |  |  |  |  |  |  |  |  |  |  |  |  |  |  |  |  |  |  |  |  |  |  |  |  |  |  |  |  |  |  |  |  |  |  |  |  |  |  |  |  |  |  |  |  |  |  |  |  |  |  |  |  |  |  |  |  |  |  |  |  |  |  |  |  |  |  |  |  |  |  |  |  |  |  |  |  |  |  |  |  |  |  |  |  |  |  |  |  |  |  |  |  |  |  |  |  |  |  |  |  |  |  |  |  |  |  |  |  |  |  |  |  |  |  |  |  |  |  |  |  |  |  |  |  |  |  |  |  |  |  |  |  |  |  |  |  |  |  |  |  |  |  |  |  |  |  |  |  |  |  |  |  |  |  |  |  |  |  |  |  |  |  |  |  |  |  |  |  |  |  |  |  |  |  |  |  |  |  |  |  |
|---------------|---|--|---|---|---|---|---|---|----|----|----|----|---|---|---|----|---|----|---|---|---|---|---|---|----|----|---|----|---|----|---|----|----|----|----|----|--|--|--|--|--|--|--|--|--|--|--|--|--|--|--|--|--|--|--|--|--|--|--|--|--|--|--|--|--|--|--|--|--|--|--|--|--|--|--|--|--|--|--|--|--|--|--|--|--|--|--|--|--|--|--|--|--|--|--|--|--|--|--|--|--|--|--|--|--|--|--|--|--|--|--|--|--|--|--|--|--|--|--|--|--|--|--|--|--|--|--|--|--|--|--|--|--|--|--|--|--|--|--|--|--|--|--|--|--|--|--|--|--|--|--|--|--|--|--|--|--|--|--|--|--|--|--|--|--|--|--|--|--|--|--|--|--|--|--|--|--|--|--|--|--|--|--|--|--|--|--|--|--|--|--|--|--|--|--|--|--|--|--|--|--|--|--|--|--|--|--|--|--|--|--|--|--|--|--|--|--|--|--|--|--|--|--|--|--|--|--|--|--|--|--|--|--|--|--|--|--|--|--|--|--|--|--|--|--|--|--|--|--|--|--|--|--|--|--|--|--|--|--|--|--|--|--|--|--|--|--|--|--|--|--|--|--|--|--|--|--|--|--|--|--|--|--|--|--|--|--|--|--|--|--|--|--|--|--|--|--|--|--|--|--|--|--|--|--|--|--|--|--|--|--|--|--|--|--|--|--|--|--|--|--|--|--|--|--|--|--|--|--|--|--|--|--|--|--|--|--|--|--|--|--|--|--|--|--|--|--|--|--|--|--|--|--|--|--|--|--|--|--|--|--|--|--|--|--|--|--|--|--|--|--|--|--|--|--|--|--|--|--|--|--|--|--|--|--|--|--|--|--|--|--|--|--|--|--|--|--|--|--|--|--|--|--|--|--|--|--|--|--|--|--|--|--|--|--|--|--|--|--|--|--|--|--|--|--|--|--|--|--|--|--|--|--|--|--|--|--|--|--|--|--|--|--|--|--|--|--|--|--|--|--|--|--|--|--|--|--|--|--|--|--|--|--|--|--|--|--|--|--|--|--|--|--|--|--|--|--|--|--|--|--|--|--|--|--|--|--|--|--|--|--|--|--|--|--|--|--|--|--|--|--|--|--|--|--|--|--|--|--|--|--|--|--|--|--|--|--|--|--|--|--|--|--|--|--|--|--|--|--|--|--|--|--|--|--|--|--|--|--|--|--|--|--|--|--|--|--|--|--|--|--|--|--|--|--|--|--|--|--|--|--|--|--|--|--|--|--|--|--|--|--|--|--|--|--|--|--|--|--|--|--|--|--|--|--|--|--|--|--|--|--|--|--|--|--|--|--|--|--|--|--|--|--|--|--|--|--|--|--|--|--|--|--|--|--|--|--|--|--|--|--|--|--|--|--|--|--|--|--|--|--|--|--|--|--|--|--|--|--|--|--|--|--|--|--|--|--|--|--|--|--|--|--|--|--|--|--|--|--|--|--|--|--|--|--|--|--|--|--|--|--|--|--|--|--|--|--|--|--|--|--|--|--|--|--|--|--|--|--|--|--|--|--|--|--|--|--|--|--|--|--|--|--|--|--|--|--|--|--|--|--|--|--|--|--|--|--|--|--|--|--|--|--|--|--|--|--|--|--|--|--|--|--|--|--|--|--|--|--|--|--|--|--|--|--|--|--|--|--|--|--|--|--|--|--|--|--|--|--|--|--|--|--|--|--|--|--|--|--|--|--|--|--|--|--|--|--|--|--|--|--|--|--|--|--|--|--|--|--|--|--|--|--|--|--|--|--|--|--|--|--|--|--|--|--|--|--|--|--|--|--|--|--|--|--|--|--|--|--|--|--|--|--|--|--|--|--|--|--|--|--|--|--|--|--|--|--|--|--|--|--|--|--|--|--|--|--|--|--|--|--|--|--|--|--|--|--|--|--|--|--|--|--|--|--|--|--|--|--|--|--|--|--|--|--|--|--|--|--|--|--|--|--|--|--|--|--|--|--|--|--|--|--|--|--|--|--|--|--|--|--|--|--|--|--|--|--|--|--|--|--|--|--|--|--|--|--|--|--|--|--|--|--|--|--|--|--|--|--|--|--|--|--|--|--|--|--|--|--|--|--|--|--|--|--|--|--|--|--|--|--|--|--|--|--|--|--|--|--|--|--|--|--|--|--|--|--|--|--|--|--|--|--|--|--|--|--|--|--|--|--|--|--|--|--|--|--|--|--|--|--|--|--|--|--|--|--|--|--|--|--|--|--|--|--|--|--|--|--|--|--|--|--|--|--|--|--|--|--|--|--|--|--|--|--|--|--|--|--|--|--|--|--|--|--|--|--|--|--|--|--|--|--|--|--|--|--|--|--|--|--|--|--|--|--|--|--|--|--|--|--|--|--|--|--|--|--|--|--|--|--|--|--|--|--|--|--|--|--|--|--|--|--|--|--|--|--|--|--|--|--|--|--|--|--|--|--|--|--|--|--|--|--|--|--|--|--|--|--|--|--|--|--|--|--|--|--|--|--|--|--|--|--|--|--|--|--|--|--|--|--|--|--|--|--|--|--|--|--|--|--|--|--|--|--|--|--|--|--|--|--|--|--|--|--|--|--|--|--|--|--|--|--|--|--|--|--|--|--|--|--|--|--|--|--|--|--|--|--|--|--|--|--|--|--|--|--|--|--|--|--|--|--|--|--|--|--|--|--|--|--|--|--|--|--|--|--|--|--|--|--|--|--|--|--|--|--|--|--|--|--|--|--|--|--|--|--|--|--|--|--|--|--|--|--|--|--|--|--|--|--|--|--|--|--|--|--|--|--|--|--|--|--|--|--|--|--|--|--|--|--|--|--|--|--|--|--|--|--|--|--|--|--|--|--|--|--|--|--|--|--|--|--|--|--|--|--|--|--|--|--|--|--|--|--|--|--|--|--|--|--|--|--|--|--|--|--|--|--|--|--|--|--|--|--|--|--|--|--|--|--|--|--|--|--|--|--|--|--|--|--|--|--|--|--|--|--|--|--|--|--|--|--|--|--|--|--|--|--|--|--|--|--|--|--|--|--|--|
