# Supplementary material for: Human MicroRNAs Originated from Two Periods at Accelerated Rates in Mammalian Evolution
Source: PubMed Central journal article supplement — Mol Biol Evol. 2012 Nov 20;30(3):613–26. doi: 10.1093/molbev/mss262 (PMC3563971; doi:10.1093/molbev/mss262), 2012-11-20
Supplement: supp_mss262_SUPPLEMENTARY_MATERIAL_Table_S2.pdf [file supp_mss262_SUPPLEMENTARY_MATERIAL_Table_S2.pdf]

Table S2.

List of estimated origination periods for 547 human miRNA genes retrieved under the stringent condition 2.

If both of the following two conditions are not satisfied, the estimates are not available; the corresponding rows in matrix is shaded in gray.

#1 The folding energy of precursor miRNA < 20.5 Kcal.

#2 Presence of both miR and miR\* in human miRNA annotation in miRBase.

The miRNAs are listed in the order of the human chromosomal locations.

Alignment used;

E: EPO 35-way multiple alignment (species name is blue or light blue shaded)

P: Pecan 19-way multiple alignment (species name is orange shaded)

B: BlastZNet (Ensembl) pairwise alignment

U: axtNet (UCSC) pairwise alignment

High-coverage genome sequences are indicated by blue-shaded species names.

Signs in matrix;

1: functional ortholog (The seed sequence exactly matches to that of human, and the secondary structure is maintained)

-1: ortholog (the ortholog sequence exists and the secondary structure is maintained but either seed sequence does not match to that of human.)

0: No ortholog.

†: Assignment of presence or absence of orthologs is not good concordance (< 50 %) between

EPO and Pecan alignment results. (In total 3 miRNAs are indicated in the Origination period column.)

| Human miRNA gene (precursor miRNAs) | Human miRNA gene (precursor miRNAs) | NO: Excluded from analyses due to high secondary structure folding energy | NO: Excluded due to lack of miR* | D: Human-specific Duplicate | S: Source of Human-specific duplicate | Origination period (CONS: Conserved beyond theria) (14: NA due to high folding energy and/or lack of miR*) | Species                       | Species (common name) | Alignment method | Human chromosome |     |
|-------------------------------------|-------------------------------------|---------------------------------------------------------------------------|----------------------------------|-----------------------------|---------------------------------------|------------------------------------------------------------------------------------------------------------|-------------------------------|-----------------------|------------------|------------------|-----|
|                                     |                                     |                                                                           |                                  |                             |                                       |                                                                                                            |                               |                       |                  | start            | end |
| hsa-mir-1302-2                      |                                     | NO                                                                        | NO                               |                             |                                       | 14                                                                                                         | ololemur_garnettii            | galago                | E                |                  |     |
| hsa-mir-200b                        |                                     | NO                                                                        | NO                               |                             |                                       | CONS                                                                                                       | microcebus_murinus            | lemur                 | E                |                  |     |
| hsa-mir-200a                        |                                     | NO                                                                        | NO                               |                             |                                       | CONS                                                                                                       | tarsius syrichta              | tarsier               | E                |                  |     |
| hsa-mir-429                         |                                     | NO                                                                        | NO                               |                             |                                       | 14                                                                                                         | callithrix jacchus            | marmoset              | E                |                  |     |
| hsa-mir-4251                        |                                     | NO                                                                        | NO                               |                             |                                       | 14                                                                                                         | macaca mulatta                | rhesus monkey         | E                |                  |     |
|                                     |                                     |                                                                           |                                  |                             |                                       |                                                                                                            | nomascus leucogenys           | gibbon                | E                |                  |     |
|                                     |                                     |                                                                           |                                  |                             |                                       |                                                                                                            | pongo abelii                  | orangutan             | E                |                  |     |
|                                     |                                     |                                                                           |                                  |                             |                                       |                                                                                                            | gorilla gorilla               | gorilla               | E                |                  |     |
|                                     |                                     |                                                                           |                                  |                             |                                       |                                                                                                            | pan_troglodytes               | chimpanzee            | E                |                  |     |
|                                     |                                     |                                                                           |                                  |                             |                                       |                                                                                                            | homo_sapiens                  | human                 | E                |                  |     |
|                                     |                                     |                                                                           |                                  |                             |                                       |                                                                                                            | tupaia_belangeri              | mouse                 | E                |                  |     |
|                                     |                                     |                                                                           |                                  |                             |                                       |                                                                                                            | rattus_novgicus               | rat                   | E                |                  |     |
|                                     |                                     |                                                                           |                                  |                             |                                       |                                                                                                            | dipodomys_ordii               | kangaroo rat          | E                |                  |     |
|                                     |                                     |                                                                           |                                  |                             |                                       |                                                                                                            | cavia_porcellus               | cavy                  | E                |                  |     |
|                                     |                                     |                                                                           |                                  |                             |                                       |                                                                                                            | spermophilus_tridecemlineatus | gopher                | E                |                  |     |
|                                     |                                     |                                                                           |                                  |                             |                                       |                                                                                                            | oryctolagus_cuniculus         | rabbit                | E                |                  |     |
|                                     |                                     |                                                                           |                                  |                             |                                       |                                                                                                            | ochotona_princeps             | pika                  | E                |                  |     |
|                                     |                                     |                                                                           |                                  |                             |                                       |                                                                                                            | tursiops_truncatus            | dolphin               | E                |                  |     |
|                                     |                                     |                                                                           |                                  |                             |                                       |                                                                                                            | alouatta_palliata             | alouatta              | E                |                  |     |
|                                     |                                     |                                                                           |                                  |                             |                                       |                                                                                                            | vicugna_pacos                 | alpaca                | E                |                  |     |
|                                     |                                     |                                                                           |                                  |                             |                                       |                                                                                                            | bos_taurus                    | cattle                | E                |                  |     |
|                                     |                                     |                                                                           |                                  |                             |                                       |                                                                                                            | canis_familiaris              | dog                   | E                |                  |     |
|                                     |                                     |                                                                           |                                  |                             |                                       |                                                                                                            | alluopoda_melanoleuca         | panda                 | E                |                  |     |
|                                     |                                     |                                                                           |                                  |                             |                                       |                                                                                                            | felis_catus                   | cat                   | E                |                  |     |
|                                     |                                     |                                                                           |                                  |                             |                                       |                                                                                                            | equus caballus                | horse                 | E                |                  |     |
|                                     |                                     |                                                                           |                                  |                             |                                       |                                                                                                            | pleiopus_vampyrus             | megabat               | E                |                  |     |
|                                     |                                     |                                                                           |                                  |                             |                                       |                                                                                                            | erinaeus_europaeus            | shrew                 | E                |                  |     |
|                                     |                                     |                                                                           |                                  |                             |                                       |                                                                                                            | myotis_lucifugus              | bat                   | E                |                  |     |
|                                     |                                     |                                                                           |                                  |                             |                                       |                                                                                                            | sorex_araneus                 | hedgehog              | E                |                  |     |
|                                     |                                     |                                                                           |                                  |                             |                                       |                                                                                                            | choloepus_hoffmanni           | shrew                 | E                |                  |     |
|                                     |                                     |                                                                           |                                  |                             |                                       |                                                                                                            | echinops_telfairi             | opossum               | E                |                  |     |
|                                     |                                     |                                                                           |                                  |                             |                                       |                                                                                                            | procavia_capensis             | opossum               | E                |                  |     |
|                                     |                                     |                                                                           |                                  |                             |                                       |                                                                                                            | loxodonta_africana            | elephant              | E                |                  |     |
|                                     |                                     |                                                                           |                                  |                             |                                       |                                                                                                            | dasyus_novemcinctus           | armadillo             | E                |                  |     |
|                                     |                                     |                                                                           |                                  |                             |                                       |                                                                                                            | monodelphis_domestica         | opossum               | E                |                  |     |
|                                     |                                     |                                                                           |                                  |                             |                                       |                                                                                                            | macropus_eugenii              | wallaby               | B                |                  |     |
|                                     |                                     |                                                                           |                                  |                             |                                       |                                                                                                            | ornithorhynchus_anatinus      | platypus              | B                |                  |     |
|                                     |                                     |                                                                           |                                  |                             |                                       |                                                                                                            | ornithorhynchus_anatinus      | platypus              | B                |                  |     |
|                                     |                                     |                                                                           |                                  |                             |                                       |                                                                                                            | gallus_gallus                 | chicken               | B                |                  |     |
|                                     |                                     |                                                                           |                                  |                             |                                       |                                                                                                            | meleagris_gallopavo           | chicken               | P                |                  |     |
|                                     |                                     |                                                                           |                                  |                             |                                       |                                                                                                            | gallus_gallus                 | chicken               | P                |                  |     |
|                                     |                                     |                                                                           |                                  |                             |                                       |                                                                                                            | taeniopygia_guttata           | zebrafinch            | P                |                  |     |
|                                     |                                     |                                                                           |                                  |                             |                                       |                                                                                                            | anolis_carolinensis           | zebrafinch            | P                |                  |     |
|                                     |                                     |                                                                           |                                  |                             |                                       |                                                                                                            | danio_reio                    | zebrafinch            | U                |                  |     |

|                |       |    |                        |                      |                              |              |          |           |               |    |   |           |           |
|----------------|-------|----|------------------------|----------------------|------------------------------|--------------|----------|-----------|---------------|----|---|-----------|-----------|
| hsa-mir-551a   | NO    | 14 | 1 1 1 1 1 1 0 0 1 0    | -1 0 0 0 0 -1 0      | 0 1 0 1 1 1 1 -1 0 0 0       | 0 1 1 0 0    | 1 NA NA  | 0 NA      | NA 0 0 0 0    | NA | 1 | 3477259   | 3477354   |
| hsa-mir-4417   | NO    | 14 | 1 0 1 1 0 1 0 0 0 0    | 0 0 0 1 0 0 0        | 0 0 0 0 0 0 0 0 0 0          | 0 0 0 0 0    | 1 NA NA  | 0 NA      | NA 0 0 0 0    | NA | 1 | 5624131   | 5624203   |
| hsa-mir-4689   | NO    | 14 | 1 1 1 1 1 -1 1 0 0 1 1 | 0 0 0 0 0 -1 0       | -1 -1 0 0 -1 -1 1 0 0 0 0    | 0 -1 -1 0 0  | 1        | 5922732   | 5922801       |    |   |           |           |
| hsa-mir-4252   | NO    | 14 | 1 -1 0 1 1 0 0 0 -1 -1 | -1 0 0 0 -1 -1 -1    | 0 0 0 0 -1 0 -1 0 -1 -1 0    | 0 -1 0 0 0   | 1        | 6489894   | 6489956       |    |   |           |           |
| hsa-mir-34a    | CONS  | 14 | 1 1 1 1 1 1 0 0 1 1    | 0 1 1 1 1 1 1 1      | 1 0 0 0 1 1 1 0 1 0 1        | 1 0 1 1 1    | NA 1 1   | NA 1      | 1 NA NA NA NA | -1 | 1 | 9211727   | 9211836   |
| hsa-mir-5697   | NO    | 14 | 1 1 1 1 0 0 0 0 0 0    | 0 0 0 0 0 0 0 0      | 0 0 0 0 0 0 0 0 0 0 0        | 0 0 0 0 0    | 1        | 10027439  | 10027516      |    |   |           |           |
| hsa-mir-1273d  | NO    | 14 | 1 1 1 -1 0 -1 -1 0 0 0 | 0 0 0 0 0 0 0 0      | 0 0 0 0 0 0 0 0 0 0 0        | 0 0 0 0 0    | 1        | 10287776  | 10287861      |    |   |           |           |
| hsa-mir-4632   | NO    | 14 | 1 1 1 1 1 -1 -1 0 0 1  | 0 0 0 0 0 -1 0       | -1 -1 0 0 -1 0 -1 1 -1 0     | 0 0 -1 -1 -1 | 1        | 12251770  | 12251830      |    |   |           |           |
| hsa-mir-3972   | NO    | 14 | 1 1 1 1 0 -1 1 0 0 0   | 0 0 0 0 0 0 0 0      | 0 0 0 0 -1 0 0 0 0 0 0       | 0 0 0 0 0    | 1        | 17604384  | 17604470      |    |   |           |           |
| hsa-mir-4695   | 3     | 3  | 1 1 1 1 1 1 1 0 -1 -1  | -1 1 0 -1 -1 -1 -1   | -1 -1 0 0 -1 -1 -1 -1 0 -1 0 | 0 0 -1 -1 0  | 1        | 19209696  | 19209769      |    |   |           |           |
| hsa-mir-1290   | NO    | 14 | 1 1 1 1 0 0 0 0 0 0    | 0 0 0 0 0 0 0 0      | 0 0 0 0 0 0 0 0 0 0 0        | 0 0 0 0 0    | 1        | 19223565  | 19223642      |    |   |           |           |
| hsa-mir-1256   | NO    | 14 | 1 1 1 1 0 1 1 0 0 0    | 0 0 0 0 0 0 0 0      | 0 0 0 0 0 0 0 0 0 0 0        | 0 0 0 0 0    | 1        | 21314807  | 21314925      |    |   |           |           |
| hsa-mir-4418   | NO NO | 14 | 0 0 0 0 0 1 0 0 0 0    | 0 0 0 -1 0 0 0       | 0 -1 0 0 0 0 0 0 0 0 0       | 0 0 0 0 0    | 1        | 22592732  | 22592793      |    |   |           |           |
| hsa-mir-4684   | 8     | 8  | 1 1 1 1 1 1 -1 0 0 0   | 0 0 0 0 0 0 0 0      | 0 -1 0 0 0 0 0 0 0 0 0       | 0 0 0 0 0    | 1        | 23046010  | 23046091      |    |   |           |           |
| hsa-mir-4253   | NO    | 14 | 1 1 1 1 1 1 1 1 1 -1   | -1 0 0 0 0 0 1 1     | 1 1 1 1 1 1 1 1 0 0 -1       | 0 0 1 0 1    | NA 0 1   | NA NA     | 0 NA NA NA NA | NA | 1 | 23189652  | 23189719  |
| hsa-mir-3115   | NO    | 14 | 1 1 0 1 1 -1 1 1 1 0   | 0 -1 0 0 1 -1 0 1    | 0 1 -1 1 1 1 0 1 1 0 0 1     | 1 0 -1 -1 0  | 1        | 23370798  | 23370865      |    |   |           |           |
| hsa-mir-4419a  | NO    | 14 | 1 1 1 1 1 0 1 0 0 0    | 0 0 0 0 0 0 0 0      | 0 0 0 0 0 0 0 0 0 0 0        | 0 0 0 0 0    | 1        | 23384351  | 23384427      |    |   |           |           |
| hsa-mir-4425   | NO    | 14 | 1 0 1 1 1 -1 0 0 0 0   | -1 -1 0 0 0 0 0 0    | 0 0 0 0 0 0 0 0 0 0 0        | 0 0 0 0 0    | 1        | 25349994  | 25350077      |    |   |           |           |
| hsa-mir-3917   | NO    | 14 | 1 1 1 1 1 1 1 0 0 1    | 0 1 0 1 1 0 0 1      | 1 1 1 0 1 1 1 1 1 1 0        | 0 1 1 0 -1   | 0 NA NA  | 0 NA      | NA 0 0 0 0    | NA | 1 | 26232853  | 26232945  |
| hsa-mir-1976   | NO    | 14 | 1 1 1 1 1 0 1 0 -1 0   | 0 0 0 -1 -1 0 0      | -1 0 -1 0 0 -1 0 0 -1 -1 0   | 0 0 0 0 0    | 1        | 26881033  | 26881084      |    |   |           |           |
| hsa-mir-4420   | NO    | 14 | 1 1 1 1 1 0 0 0 -1 -1  | -1 0 0 0 0 0 0 0     | 0 -1 0 0 -1 0 0 -1 0 -1 0    | 0 -1 0 0     | 1        | 31212003  | 31212079      |    |   |           |           |
| hsa-mir-4254   | NO    | 14 | 1 1 1 1 -1 -1 -1 -1 -1 | -1 -1 -1 1 -1 1 -1   | -1 1 0 -1 1 -1 0 -1 0 -1 0   | -1 0 -1 0 -1 | 1        | 32224261  | 32224336      |    |   |           |           |
| hsa-mir-5585   | NO    | 14 | 0 0 0 0 0 -1 0 0 0 0   | 0 0 0 0 0 0 0 0      | 0 0 0 0 0 0 0 0 0 0 0        | 0 0 0 0 0    | 1        | 32552550  | 32552608      |    |   |           |           |
| hsa-mir-3605   | NO    | 2  | 1 1 1 1 0 0 1 -1 1 -1  | -1 -1 -1 -1 -1 -1 -1 | -1 -1 -1 0 0 1 -1 -1 -1 -1   | -1 -1 0 0 1  | -1 NA NA | -1 NA     | NA 0 0 0 0    | NA | 1 | 33797994  | 33798093  |
| hsa-mir-552    | NO    | 14 | 1 1 1 1 0 0 -1 0 0 0   | 0 0 0 0 0 0 0 0      | 0 0 0 0 0 0 0 0 0 0 0        | 0 0 0 0 0    | 1        | 35135290  | 35135295      |    |   |           |           |
| hsa-mir-4255   | NO NO | 14 | 0 0 0 0 0 1 0 1 -1     | 0 0 0 0 0 -1 0       | 0 0 0 0 0 0 0 0 0 0 0        | 0 0 0 -1 0   | 1        | 37627164  | 37627235      |    |   |           |           |
| hsa-mir-5581   | NO    | 6  | 1 0 1 0 0 0 0 0 1 -1   | 0 0 0 0 0 0 0 0      | 0 0 0 0 0 0 0 0 0 0 0        | 0 0 0 0 0    | 1        | 37966536  | 37966595      |    |   |           |           |
| hsa-mir-3659   | NO    | 14 | 1 0 1 1 0 0 0 0 0 0    | 0 0 0 0 0 0 0 0      | 0 0 0 0 0 0 -1 0 0 0 -1      | 0 0 0 0 0    | 1        | 38554903  | 38555001      |    |   |           |           |
| hsa-mir-30e    | CONS  | 14 | 1 1 1 1 1 1 1 1 1 1    | 1 1 1 1 1 1 1 1      | 1 1 1 1 1 1 1 1 1 1 1 1      | 0 0 1 1 0    | 1 NA NA  | 1 NA      | NA 1 1 1 1    | NA | 1 | 41220027  | 41220118  |
| hsa-mir-30c-1  | CONS  | 14 | 1 1 1 1 1 1 1 1 1 1    | 1 1 1 1 0 1 1        | 1 1 1 1 1 1 1 1 1 1 1 1      | 1 0 1 1 0    | 1 NA NA  | 1 NA      | NA 1 1 1 1    | NA | 1 | 41222956  | 41223044  |
| hsa-mir-5584   | 10    | 10 | 1 1 1 1 0 0 0 0 0 0    | -1 0 0 0 0 -1 0      | 0 0 0 0 0 0 0 0 0 0 0        | 0 0 0 0 0    | 1        | 45011165  | 45011224      |    |   |           |           |
| hsa-mir-4421   | NO    | 14 | 1 1 1 1 0 0 0 0 0 0    | 0 0 0 0 0 0 0 0      | 0 0 0 0 0 0 0 0 0 0 0        | 0 0 0 0 0    | 1        | 51525509  | 51525577      |    |   |           |           |
| hsa-mir-761    | NO    | 14 | 1 1 1 1 0 1 1 1 1 1    | 1 1 1 1 1 1 -1       | 1 1 1 1 1 1 1 -1 1 1 1       | 0 1 1 -1 1   | 1 NA NA  | 1 NA      | NA 0 0 0 0    | NA | 1 | 52302016  | 52302074  |
| hsa-mir-1273f  | NO    | 14 | 1 1 1 1 0 0 0 0 0 0    | 0 0 0 0 0 0 0 0      | 0 0 0 0 0 0 0 0 0 0 0        | 0 0 0 0 0    | 1        | 53394346  | 53394444      |    |   |           |           |
| hsa-mir-5095   | NO    | 14 | 1 1 0 0 0 0 0 0 0 0    | 0 0 0 0 0 0 0 0      | 0 0 0 0 0 0 0 0 0 0 0        | 0 0 0 0 0    | 1        | 53400602  | 53400689      |    |   |           |           |
| hsa-mir-1273g  | 10    | 10 | 1 1 1 1 0 0 0 0 0 0    | 0 0 0 0 0 0 0 0      | 0 0 0 0 0 0 0 0 0 0 0        | 0 0 0 0 0    | 1        | 53405986  | 53406085      |    |   |           |           |
| hsa-mir-4781   | 11    | 11 | 1 1 1 -1 0 -1 -1 0 0 0 | 0 0 0 0 0 0 0 0      | 0 0 0 0 0 0 0 0 0 0 0        | 0 0 0 0 0    | 1        | 54519752  | 54519827      |    |   |           |           |
| hsa-mir-4422   | NO    | 14 | 1 1 1 1 1 1 -1 0 0 0   | 0 0 0 0 0 0 0 0      | 0 0 0 0 0 0 0 0 0 0 0        | 0 0 0 0 0    | 1        | 55691314  | 55691396      |    |   |           |           |
| hsa-mir-4711   | 7     | 7  | 1 1 -1 0 0 0 0 1 0 0   | 0 0 0 0 0 0 0 0      | 0 0 0 0 0 0 0 -1 0 0 0       | 0 0 0 0 0    | 1        | 60198899  | 60198968      |    |   |           |           |
| hsa-mir-3116-1 | NO    | 14 | 1 -1 1 0 1 0 0 0 0 0   | 0 0 0 0 0 0 0 0      | 0 0 0 0 0 0 0 0 0 0 0        | 0 0 0 0 0    | 1        | 62544458  | 62544531      |    |   |           |           |
| hsa-mir-3116-2 | NO    | 14 | 1 1 1 0 1 0 0 0 0 0    | 0 0 0 0 0 0 0 0      | 0 0 0 0 0 0 0 0 0 0 0        | 0 0 0 0 0    | 1        | 62544461  | 62544528      |    |   |           |           |
| hsa-mir-4794   | NO    | 14 | 1 1 1 1 1 1 -1 0 0 0   | 0 0 0 0 0 0 0 0      | 0 0 0 0 0 0 0 0 0 0 0        | 0 0 0 0 0    | 1        | 65045530  | 65045606      |    |   |           |           |
| hsa-mir-3671   | NO NO | 14 | 0 0 1 0 0 1 0 0 0 0    | 0 0 0 0 0 0 0 0      | 0 -1 0 0 -1 0 -1 0 -1 0      | 0 0 0 0 0    | 1        | 65523438  | 65523525      |    |   |           |           |
| hsa-mir-101-1  | CONS  | 14 | 1 1 1 1 1 1 1 1 1 1    | 1 1 1 1 1 1 1 1      | 1 1 1 1 1 1 1 1 1 1 1 1      | 1 1 1 1 1    | NA 1 1   | NA 1      | 1 NA NA NA NA | 1  | 1 | 65524117  | 65524191  |
| hsa-mir-3117   | 6     | 6  | 1 1 0 1 1 1 -1 -1 1 -1 | 0 0 0 0 0 0 0 0      | 0 0 0 0 -1 0 0 -1 0 0 0      | 0 0 0 0 -1   | NA NA NA | NA NA     | NA NA NA NA   | NA | 1 | 67094123  | 67094200  |
| hsa-mir-1262   | NO    | 14 | 1 1 0 1 -1 1 0 0 0 0   | 0 0 0 0 -1 0 0 0     | 0 -1 0 0 0 0 -1 -1 -1 0      | 0 0 0 0 0    | 1        | 68649201  | 68649293      |    |   |           |           |
| hsa-mir-186    | 0     | 0  | 1 1 1 1 1 0 1 1 1 1    | 1 1 1 1 1 0 1 1      | 1 1 1 1 1 1 1 0 1 1 1 1      | 1 1 1 1 1    | 1 NA NA  | 0 NA      | NA 0 0 0 0    | NA | 1 | 71533314  | 71533399  |
| hsa-mir-4423   | 7     | 7  | 1 1 1 1 1 1 1 0 0 0    | 0 0 0 0 0 0 0 0      | 0 0 0 0 0 0 0 0 0 0 0        | 0 0 0 -1 0   | 1        | 85599477  | 85599556      |    |   |           |           |
| hsa-mir-760    | NO    | 14 | 1 1 1 1 1 0 0 1 1 0    | 1 1 1 1 0 0 1 1      | 1 1 0 1 -1 1 0 0 1 -1 0      | 0 1 1 1 1    | NA NA NA | NA NA     | NA NA NA NA   | NA | 1 | 94312388  | 94312467  |
| hsa-mir-378g   | NO    | 14 | 1 1 1 1 1 1 0 0 0 0    | 0 0 0 0 0 0 0 0      | 0 0 1 0 0 0 0 0 -1 0 0 0     | 0 0 1 0 0    | NA NA NA | NA NA     | NA NA NA NA   | NA | 1 | 95211416  | 95211456  |
| hsa-mir-2682   | 2     | 2  | 1 1 1 1 1 1 1 0 0 -1   | 0 1 1 0 1 1 1 0      | 1 1 0 1 0 1 1 1 1 -1 1 -1    | -1 -1 -1     | 1        | 98510798  | 98510907      |    |   |           |           |
| hsa-mir-137    | NO    | 14 | 1 1 0 0 1 1 1 1 0 1    | 1 1 -1 0 0 1 0       | 1 1 0 1 1 1 0 1 1 0 0 1      | -1 1 1 1 1   | 1 NA NA  | 1 NA      | NA 1 0 1 1    | NA | 1 | 98511626  | 98511727  |
| hsa-mir-553    | NO    | 14 | 1 1 0 0 0 0 0 0 0 0    | 0 0 0 0 0 0 0 0      | 0 0 0 0 0 0 0 0 0 0 0        | 0 0 0 0 0    | 1        | 100746797 | 100746864     |    |   |           |           |
| hsa-mir-197    | 1     | 1  | 1 1 1 1 1 1 1 1 1 1    | 1 0 -1 0 1 1 1 -1    | 1 1 1 0 1 1 1 1 -1 0 0 0     | 1 1 1 1 1    | 0 NA NA  | 0 NA      | NA 0 0 0 0    | NA | 1 | 110141515 | 110141589 |
| hsa-mir-4256   | NO NO | 14 | 0 0 0 0 0 0 0 0 0 0    | 0 0 0 0 0 0 0 0      | 0 0 0 0 0 0 0 0 0 0 0        | 0 0 0 0 0    | 1        | 113004392 | 113004455     |    |   |           |           |
| hsa-mir-548ac  | NO    | 14 | 1 1 1 1 0 0 -1 0 0 0   | -1 0 0 0 0 0 0 0     | 0 0 0 -1 0 0 0 0 0 0 0       | 0 0 0 0 0    | 1        | 117102646 | 117102733     |    |   |           |           |
| hsa-mir-320b-1 | NO    | 14 | 1 1 1 1 1 0 0 1 1 0    | 0 0 1 1 1 0 0        | 1 0 1 0 0 0 0 1 0 1 1        | 1 1 0 1 1    | NA NA NA | NA NA     | NA NA NA NA   | NA | 1 | 117214371 | 117214449 |
| hsa-mir-942    | NO    | 14 | 1 1 1 1 1 1 0 0 0 0    | 0 0 0 0 0 0 0 0      | 0 0 0 0 0 0 1 0 0 0 0        | 0 0 0 0 0    | 1        | 117637265 | 117637350     |    |   |           |           |
| hsa-mir-5087   | NO NO | 14 | 0 0 0 0 0 0 0 0 0 0    | 0 0 0 0 0 0 0 0      | 0 0 0 0 0 0 0 0 0 0 0        | 0 0 0 0 0    | 1        | 147806603 | 147806678     |    |   |           |           |
| hsa-mir-4257   | NO    | 14 | 1 1 1 -1 -1 -1 0 0 -1  | 0 0 -1 0 0 -1 -1     | -1 -1 -1 -1 -1 0 -1 0 -1 0   | 0 0 -1 -1 -1 | 1        | 150524405 | 150524490     |    |   |           |           |
| hsa-mir-554    | NO    | 14 | 1 1 1 1 1 1 0 0 1 -1   | 0 1 0 0 -1 1 -1 0    | 0 -1 0 -1 -1 -1 1 1 -1 0     | 0 1 0 -1 0   | NA NA NA | NA NA     | NA NA NA NA   | NA | 1 | 151518272 | 151518367 |
| hsa-mir-5698   | NO    | 14 | 1 -1 1 0 0 0 0 0 0 0   | 0 0 0 0 0 0 0 0      | 0 0 0 0 0 0 0 0 0 0 0        | 0 0 0 0 0    | 1        | 154076997 | 154077068     |    |   |           |           |

|                 |      |    |                         |                               |                                  |                         |           |       |                |    |   |           |           |           |
|-----------------|------|----|-------------------------|-------------------------------|----------------------------------|-------------------------|-----------|-------|----------------|----|---|-----------|-----------|-----------|
| hsa-mir-190b    | NO   | 14 | 1 1 1 1 1 1 1 1 1 1     | 1 1 1 1 1 1 1 1               | 1 1 1 1 1 1 1 1 1 1              | 1 1 1 1 1 1 1 1 1 1     | NA 0 1    | NA NA | NA NA NA NA NA | NA | 1 | 154166141 | 154166219 |           |
| hsa-mir-4258    | NO   | 14 | 1 1 1 1 1 -1 0 0 0 0    | 0 0 0 0 0 0 0 0               | 0 0 0 0 0 0 0 0                  | 0 0 0 0 0 0 0 0 0 0     | 0 0 0 0 0 |       |                |    |   | 1         | 154948169 | 154948259 |
| hsa-mir-92b     | -1   | 14 | 1 1 1 1 1 1 1 0 0 1     | 1 1 1 1 1 1 0 0               | 1 1 0 1 1 0 0 1 1 1 1            | 1 0 1 1 1 0             | NA 0 1    | NA 1  | NA NA NA NA NA | NA | 1 | 155164968 | 155165063 |           |
| hsa-mir-555     | NO   | 14 | 1 1 0 1 1 1 -1 0 1 0    | 1 0 0 0 1 0 0 0               | -1 -1 -1 -1 -1 -1 -1 -1 -1 -1    | 1 1 -1 -1               | NA 0 1    | NA NA | 1 NA NA NA NA  | NA | 1 | 155316141 | 155316236 |           |
| hsa-mir-9-1     | CONS | 14 | 1 1 1 1 1 1 1 0 1 1     | 1 1 1 1 1 1 1 1               | 1 1 1 1 1 1 1 1 1 1              | 0 1 1 0                 | NA 0 1    | NA 1  | 0 NA NA NA NA  | 1  | 1 | 156390133 | 156390221 |           |
| hsa-mir-765     | NO   | 14 | 1 1 1 1 1 1 1 0 -1 -1   | -1 -1 -1 -1 -1 -1 -1 -1 -1 -1 | 1 1 0 1 0 -1 0 1 0 -1 0          | 0 -1 -1 -1 -1           |           |       |                |    | 1 | 156905923 | 156906036 |           |
| hsa-mir-4259    | NO   | 14 | 1 1 0 1 1 1 1 0 1 0     | -1 -1 -1 -1 -1 -1 -1 -1 -1 -1 | 1 1 0 1 0 -1 -1 -1 1 0 0         | 1 0 -1 -1 1             | NA NA NA  | NA NA | NA NA NA NA NA | NA | 1 | 159869769 | 159869869 |           |
| hsa-mir-5187    | 1    | 14 | 1 1 1 1 0 0 1 1 0 0     | 0 0 0 0 0 -1 0                | 1 -1 0 1 -1 -1 1 -1 -1 0         | 0 1 1 0 0               | NA 0 0    | NA 0  | 0 NA NA NA NA  | NA | 1 | 161196976 | 161197051 |           |
| hsa-mir-4654    | NO   | 14 | 1 1 1 1 1 1 -1 -1 -1 -1 | -1 -1 0 -1 0 0 0              | -1 -1 -1 -1 0 -1 -1 1 0 0 0      | 0 0 0 0 1               | NA NA NA  | NA NA | NA NA NA NA NA | NA | 1 | 162126897 | 162126972 |           |
| hsa-mir-556     | 7    | 14 | 1 1 1 1 1 1 1 0 0 0     | 0 0 0 0 0 0 0 0               | 0 0 0 0 0 0 0 0                  | 0 0 0 0 0               |           |       |                |    | 1 | 162312336 | 162312430 |           |
| hsa-mir-3658    | NO   | NO | 14                      | 0 0 0 0 0 0 0 0 0 0           | 0 0 0 0 0 0 0 0                  | 0 0 0 0 0 0 0 0 0 0     | 0 0 0 0 0 |       |                |    | 1 | 165877158 | 165877213 |           |
| hsa-mir-921     | NO   | 14 | 1 1 1 1 1 0 0 0 0 0     | 0 -1 0 -1 0 0 0 0             | 0 -1 0 -1 0 0 0 1 0 -1 0 0       | 0 0 0 0 0               | NA NA NA  | NA NA | NA NA NA NA NA | NA | 1 | 166123980 | 166124035 |           |
| hsa-mir-1255b-2 | 8    | 14 | 1 1 1 1 0 1 -1 0 0 0    | 0 0 0 0 0 0 0 0               | 0 0 0 0 0 0 0 0 0 0 0 0          | 0 0 0 0 0               |           |       |                |    | 1 | 167967898 | 167967964 |           |
| hsa-mir-557     | NO   | 14 | 1 1 1 1 -1 0 0 0 -1 1   | 0 0 0 0 0 0 0 -1              | 1 0 0 0 0 -1 0 1 0 0 0 0         | 0 0 0 0 0               |           |       |                |    | 1 | 168344762 | 168344859 |           |
| hsa-mir-3119-1  | NO   | 14 | 1 1 1 0 -1 0 0 0 0 0    | 0 0 0 0 0 0 0 0               | 0 0 0 0 0 0 0 0 0 0 0 0          | 0 0 0 0 0               |           |       |                |    | 1 | 170120519 | 170120603 |           |
| hsa-mir-3119-2  | NO   | 14 | 1 1 1 0 1 0 0 0 0 0     | 0 0 0 0 0 0 0 0               | 0 0 0 0 0 0 0 0 0 0 0 0          | 0 0 0 0 0               |           |       |                |    | 1 | 170120519 | 170120603 |           |
| hsa-mir-1295a   | NO   | 14 | 1 1 1 1 1 1 0 0 0 0     | 0 0 0 0 0 0 0 0               | 0 0 0 0 0 0 0 0 0 0 0 0          | 0 0 0 0 0               |           |       |                |    | 1 | 171070869 | 171070947 |           |
| hsa-mir-1295b   | 9    | 14 | 1 1 1 1 1 0 0 0 0 0     | 0 0 0 0 0 0 0 0               | 0 0 0 0 0 0 0 0 0 0 0 0          | 0 0 0 0 0               |           |       |                |    | 1 | 171070880 | 171070939 |           |
| hsa-mir-214     | CONS | 14 | 1 1 1 1 1 1 1 1 1 1     | 1 1 1 1 1 1 1 1               | 1 1 1 1 1 1 1 0 1 1 1 1 1        | 0 0 1 1 1               | NA 0 1    | NA 1  | 0 NA NA NA NA  | 1  | 1 | 172107938 | 172108047 |           |
| hsa-mir-3120    | CONS | 14 | 1 1 1 1 1 1 1 1 1 1     | 1 1 1 1 1 1 1 1               | 1 1 1 1 1 1 0 1 1 1 1 1          | 0 0 1 1 1               | NA 1 1    | NA 1  | 1 NA NA NA NA  | 1  | 1 | 172107948 | 172108028 |           |
| hsa-mir-199a-2  | CONS | 14 | 1 1 1 1 1 1 0 1 1 1     | 1 1 1 1 1 1 1 1               | 1 1 1 1 1 1 1 1 1 1 1            | 1 0 1 1 1               | NA 1 1    | NA 1  | 1 NA NA NA NA  | 1  | 1 | 172113675 | 172113784 |           |
| hsa-mir-488     | 1    | 14 | 1 1 1 1 1 1 1 1 1 1     | 1 1 1 1 0 1 1 1               | 1 1 1 0 1 1 1 1 0 1 0 0          | 1 1 1 1 1               | NA NA NA  | NA NA | NA NA NA NA NA | NA | 1 | 176998499 | 176998581 |           |
| hsa-mir-4424    | NO   | 14 | 1 1 1 1 1 0 -1 0 0 0    | 0 0 0 0 0 0 0 0               | 0 0 0 0 0 0 0 0 0 0 0 0          | 0 0 0 0 0               |           |       |                |    | 1 | 178646884 | 178646969 |           |
| hsa-mir-3121    | 1    | 9  | 1 1 1 1 1 1 0 0 0 0     | 0 0 0 0 0 0 0 0               | 0 0 0 0 0 0 0 0 0 0 0 0          | 0 0 0 0 0               |           |       |                |    | 1 | 180407449 | 180407525 |           |
| hsa-mir-4426    | NO   | NO | 14                      | 0 0 0 0 0 0 0 0 0 0           | 0 0 0 0 0 0 0 0                  | 0 0 0 0 0 0 0 0 0 0 0 0 | 0 0 0 0 0 |       |                |    | 1 | 192685458 | 192685520 |           |
| hsa-mir-1278    | NO   | 14 | 1 1 1 0 1 1 -1 1 0 0    | 0 0 0 0 0 0 0 0               | -1 -1 0 0 0 0 0 0 0 0 0 0        | 0 0 0 0 0               |           |       |                |    | 1 | 193105633 | 193105713 |           |
| hsa-mir-4735    | 7    | 14 | 1 1 1 1 1 1 1 0 0 0     | 0 0 0 0 0 0 0 0               | 0 0 0 0 0 0 0 0 0 0 0 0          | 0 0 0 0 0               |           |       |                |    | 1 | 196551543 | 196551611 |           |
| hsa-mir-181b-1  | CONS | 14 | 1 1 1 1 1 1 1 1 0 1     | 1 1 1 1 1 1 1 1               | 1 1 1 1 1 1 1 1 1 1 1 1          | 1 1 1 1 1               | NA 1 1    | NA 1  | 1 NA NA NA NA  | -1 | 1 | 198828002 | 198828111 |           |
| hsa-mir-181a-1  | CONS | 14 | 1 1 1 1 1 1 1 1 1 1     | 1 1 1 1 1 1 1 1               | 1 1 1 1 1 1 1 1 1 1 1 1          | 1 1 1 1 1               | NA 1 1    | NA 1  | 1 NA NA NA NA  | NA | 1 | 198828173 | 198828282 |           |
| hsa-mir-5191    | NO   | 14 | 1 1 -1 0 1 1 -1 0 0 0   | 0 0 0 0 -1 0 0 0              | 0 0 0 0 -1 0 0 0 0 0 0 0         | 0 0 -1 0 0              |           |       |                |    | 1 | 201688636 | 201688755 |           |
| hsa-mir-1231    | NO   | 14 | 1 0 1 0 1 0 -1 0 -1 -1  | 1 1 -1 -1 1 -1 0              | -1 0 0 -1 -1 -1 1 -1 0 -1 -1     | 0 0 -1 0 -1             |           |       |                |    | 1 | 201777739 | 201777830 |           |
| hsa-mir-135b    | -1   | 14 | 1 1 1 0 1 1 1 0 1 1     | 1 0 0 1 1 1 1 1               | 1 1 0 0 1 1 1 1 1 1 1 0 0        | 0 1 1 0 1               | NA 0 1    | NA 1  | 0 NA NA NA NA  | -1 | 1 | 205417430 | 205417526 |           |
| hsa-mir-29c     | -1   | 14 | 1 1 1 1 1 1 1 0 1 1     | 1 1 1 1 1 1 1 1               | 1 1 1 0 1 1 1 1 1 1 1 1          | 1 1 1 1 0               | NA 0 1    | NA 1  | 0 NA NA NA NA  | NA | 1 | 207975197 | 207975284 |           |
| hsa-mir-29b-2   | CONS | 14 | 1 1 1 1 1 1 1 0 1 1     | 1 1 1 1 1 1 1 1               | 1 1 1 0 1 1 1 1 1 1 1 1          | 1 1 1 1 1               | NA 1 1    | NA 1  | 1 NA NA NA NA  | NA | 1 | 207975788 | 207975868 |           |
| hsa-mir-205     | CONS | 14 | 1 1 1 1 1 1 1 1 1 1     | 1 1 0 1 0 1                   | 1 1 0 0 1 1 1 1 1 1 0 1          | 1 1 1 1 1               | NA 1 1    | NA 1  | 1 NA NA NA NA  | NA | 1 | 209605478 | 209605587 |           |
| hsa-mir-4260    | NO   | 14 | 1 1 0 1 0 1 1 0 0 0     | 0 0 0 0 0 0 0 0               | 0 0 0 0 0 0 0 0 0 0 0 0          | 0 0 0 0 0               |           |       |                |    | 1 | 209796789 | 209796855 |           |
| hsa-mir-3122    | NO   | 14 | 1 1 1 0 1 1 1 0 0 0     | 0 0 0 0 0 0 0 0               | 0 0 0 0 0 0 0 0 0 0 0 0          | 0 0 0 0 0               |           |       |                |    | 1 | 212250955 | 212251027 |           |
| hsa-mir-215     | NO   | 14 | 1 1 1 0 1 0 0 1 0 1     | 0 0 1 1 0 1 0                 | 1 0 1 0 0 1 0 1 1 1 1            | 0 0 1 0 1               | NA 0 1    | NA NA | 1 NA NA NA NA  | NA | 1 | 220291195 | 220291304 |           |
| hsa-mir-194-1   | NO   | 14 | 1 1 1 0 1 0 0 1 0 1     | 0 0 1 0 0 1 1                 | 1 0 1 0 0 1 1 0 1 1 1            | 1 0 1 0 1               | NA NA NA  | NA NA | 1 NA NA NA NA  | NA | 1 | 220291499 | 220291583 |           |
| hsa-mir-664     | 1    | 14 | 1 1 1 1 1 1 1 0 1 1     | 1 1 1 1 1 1 0 1               | 1 1 0 1 1 1 0 1 1 0 -1 0 -1      | -1 1 1 -1               | NA NA NA  | NA NA | 0 NA NA NA NA  | NA | 1 | 220373880 | 220373961 |           |
| hsa-mir-320b-2  | NO   | 14 | 1 1 -1 0 1 1 0 0 1 1    | 0 0 1 1 1 0 0                 | 1 0 1 0 0 0 0 1 0 1 0            | 1 1 1 1 1               | NA NA NA  | NA NA | NA NA NA NA NA | NA | 1 | 224444706 | 224444843 |           |
| hsa-mir-4742    | 7    | 14 | 1 1 1 1 1 1 1 0 0 0     | -1 -1 0 0 0 0 0               | 0 0 1 0 0 0 0 0 0 0 0 0          | 0 0 0 0 0               | NA 0 0    | NA 0  | 0 NA NA NA NA  | NA | 1 | 224585929 | 224586013 |           |
| hsa-mir-5008    | 8    | 14 | 1 0 1 -1 1 1 0 0 0 0    | 0 0 0 0 0 -1 0                | 0 0 0 0 0 0 0 0 0 0 0 0          | 0 0 -1 -1 0             |           |       |                |    | 1 | 228129291 | 228129384 |           |
| hsa-mir-3620    | NO   | 14 | 1 0 1 1 1 0 0 0 -1 -1   | -1 -1 -1 -1 -1 -1 -1          | -1 -1 -1 0 0 -1 -1 0 -1 -1 0     | 0 0 0 -1                |           |       |                |    | 1 | 228284964 | 228285042 |           |
| hsa-mir-4666a   | 1    | 14 | 1 1 1 1 1 1 1 0 0 1     | 0 0 0 0 -1 0 0                | 0 0 0 0 0 0 0 0 0 0 0 0          | 0 0 1 0 1               | NA NA NA  | NA NA | NA NA NA NA NA | NA | 1 | 228649775 | 228649853 |           |
| hsa-mir-1182    | NO   | 14 | 1 0 1 0 1 1 1 -1 -1 -1  | 0 0 -1 -1 -1 -1 -1            | -1 -1 -1 -1 -1 -1 -1 -1 -1 -1 -1 | -1 -1 -1                |           |       |                |    | 1 | 231155574 | 231155670 |           |
| hsa-mir-4427    | NO   | 14 | 1 1 1 1 1 0 0 -1 -1 -1  | 0 0 0 -1 0 0 0                | 0 0 0 -1 0 0 0 0 0 0 0 0         | 0 0 0 0 0               |           |       |                |    | 1 | 233759898 | 233759965 |           |
| hsa-mir-4671    | 7    | 14 | 1 1 1 1 1 1 1 0 0 0     | 0 0 0 0 0 0 0 0               | 0 0 0 0 0 0 0 0 0 0 0 0          | 0 0 0 0 0               |           |       |                |    | 1 | 234442213 | 234442285 |           |
| hsa-mir-4753    | 7    | 14 | 1 -1 1 1 0 1 1 0 0 0    | 0 0 0 0 0 0 0 0               | 0 0 0 0 0 0 0 0 0 0 0 0          | 0 0 0 0 0               |           |       |                |    | 1 | 235353349 | 235353431 |           |
| hsa-mir-1537    | NO   | 14 | 1 -1 -1 -1 0 -1 0 0 0   | 0 0 0 0 0 0 0 0               | 0 0 0 0 0 0 0 0 0 0 0 0          | 0 0 0 0 0               |           |       |                |    | 1 | 236016300 | 236016360 |           |
| hsa-mir-4428    | NO   | 14 | 1 1 1 1 1 1 1 0 0 0     | 0 0 0 0 0 0 0 0               | 0 0 0 0 0 0 0 0 0 0 0 0          | 0 0 0 0 0               |           |       |                |    | 1 | 237634419 | 237634491 |           |
| hsa-mir-3123    | NO   | 14 | 1 1 1 1 1 0 0 0 0 0     | 0 0 0 0 0 0 0 0               | 0 0 0 0 0 0 0 -1 0 0 0           | 0 0 0 0 0               |           |       |                |    | 1 | 241295572 | 241295646 |           |
| hsa-mir-4677    | -1   | 14 | 1 1 1 1 1 1 1 1 1 1     | 0 1 1 1 1 1 1                 | 1 1 0 1 1 -1 0 1 1 1 0 0         | 0 1 1 1 1               | NA 0 1    | NA 1  | 0 NA NA NA NA  | NA | 1 | 243509478 | 243509557 |           |
| hsa-mir-3916    | NO   | 14 | 1 0 1 1 1 0 0 0 0 0     | 0 0 0 0 -1 -1 0               | -1 0 -1 0 -1 -1 0 0 1 -1 -1      | -1 1 0 0                | NA NA NA  | NA NA | NA NA NA NA NA | NA | 1 | 247365269 | 247365362 |           |
| hsa-mir-3124    | 7    | 14 | 1 1 1 1 1 0 1 1 0 0     | 0 0 0 0 0 0 0                 | 0 0 0 0 0 -1 0 0 0 -1 0 0 0      | 0 0 0 0 0               |           |       |                |    | 1 | 249120576 | 249120642 |           |
| hsa-mir-4261    | NO   | 14 | 1 1 0 0 0 0 0 0 0 0     | 0 0 0 0 0 -1 0                | 0 0 0 0 0 0 0 0 0 0 0 0          | 0 0 0 0 0               |           |       |                |    | 2 | 10332740  | 10332797  |           |
| hsa-mir-4429    | NO   | 14 | 1 1 0 1 1 1 -1 0 -1 0   | -1 -1 -1 0 0 0 0              | 0 0 -1 -1 -1 -1 -1 0 -1 -1 0 -1  | 0 0 -1 -1               |           |       |                |    | 2 | 11680731  | 11680803  |           |
| hsa-mir-548s    | NO   | 14 | 1 1 1 1 1 0 -1 0 0 0    | 0 0 0 0 0 0 0 0               | 0 0 0 0 0 0 0 0 0 0 0 0          | 0 0 0 0 0               |           |       |                |    | 2 | 11907570  | 11907651  |           |
| hsa-mir-4262    | NO   | 14 | 1 -1 -1 -1 -1 0 0 0 0   | 0 0 0 0 0 0 0 0               | 0 0 0 0 0 0 0 0 0 0 0 0          | 0 0 0 0 0               |           |       |                |    | 2 | 11977059  | 11977112  |           |
| hsa-mir-3681    | 6    | 14 | 1 1 1 1 1 1 1 0 1 0     | 0 0 0 0 0 -1 0                | 0 0 0 0 0 0 0 0 0 0 0 0          | 0 0 0 0 0               |           |       |                |    | 2 | 12339256  | 12339327  |           |
| hsa-mir-3125    | NO   | 14 | 1 1 1 1 1 1 -1 -1 -1 -1 | 0 0 0 -1 0 -1 -1              | -1 -1 -1 0 0 -1 -1 0 0 -1 -1 -1  | 0 0 -1 0 -1             |           |       |                |    | 2 | 12877493  | 12877570  |           |
| hsa-mir-4757    | 7    | 14 | 1 1 1 1 1 1 1 -1 -1 0   | -1 -1 -1 0 -1 0 -1            | -1 -1 -1 0 0 0 -1 -1 -1 0 -1     | 0 0 -1 0 -1             |           |       |                |    | 2 | 19548190  | 19548266  |           |



|                |      |    |    |    |    |    |    |    |    |    |    |     |    |    |    |    |    |    |    |    |    |    |    |    |    |    |    |    |    |    |    |    |    |    |    |    |    |    |    |    |           |           |           |          |          |    |   |   |   |   |   |   |    |
|----------------|------|----|----|----|----|----|----|----|----|----|----|-----|----|----|----|----|----|----|----|----|----|----|----|----|----|----|----|----|----|----|----|----|----|----|----|----|----|----|----|----|-----------|-----------|-----------|----------|----------|----|---|---|---|---|---|---|----|
| hsa-mir-1302-4 | NO   | 14 | 1  | -1 | 1  | -1 | 1  | 1  | 0  | 1  | -1 | -1  | 0  | -1 | -1 | -1 | -1 | -1 | 1  | 0  | -1 | -1 | -1 | 0  | 0  | 0  | -1 | -1 | 0  | 0  | -1 | NA | 2         | 208133999 | 208134148 |          |          |    |   |   |   |   |   |   |    |
| hsa-mir-4775   | NO   | 14 | 1  | 1  | 1  | 1  | 0  | 0  | 1  | 0  | 1  | 0   | 0  | 0  | 0  | 0  | 0  | 0  | 0  | 1  | 0  | 0  | -1 | 1  | 1  | 0  | 0  | 0  | 0  | 0  | 0  | 0  | 0  | 0  | 1  | -1 | 0  | 0  | 0  | 0  | 2         | 208619531 | 208619605 |          |          |    |   |   |   |   |   |   |    |
| hsa-mir-548f-2 | NO   | 14 | 1  | -1 | 1  | 1  | 1  | 1  | 1  | 0  | 0  | 0   | 0  | 0  | 0  | 0  | 0  | 0  | 0  | 0  | 0  | 0  | 0  | 0  | 0  | 0  | 0  | 0  | 0  | 0  | 0  | 0  | 0  | 0  | 0  | 0  | 0  | 0  | 0  | 0  | 2         | 213290987 | 213291084 |          |          |    |   |   |   |   |   |   |    |
| hsa-mir-4776-1 |      | 2  | 1  | -1 | 1  | 1  | 0  | 0  | 0  | 0  | 0  | 0   | 0  | 0  | 0  | 0  | 0  | 0  | 0  | -1 | 1  | 0  | 0  | 0  | 0  | 0  | 0  | 0  | 0  | 0  | 0  | 0  | 0  | 0  | 0  | 0  | 0  | 0  | 0  | 0  | 2         | 213790981 | 213791060 |          |          |    |   |   |   |   |   |   |    |
| hsa-mir-4776-2 |      | 10 | 1  | -1 | 1  | 1  | 0  | 0  | 0  | 0  | 0  | 0   | 0  | 0  | 0  | 0  | 0  | 0  | 0  | 0  | -1 | 0  | 0  | 0  | 0  | 0  | 0  | 0  | 0  | 0  | 0  | 0  | 0  | 0  | 0  | 0  | 0  | 0  | 0  | 0  | 2         | 213790981 | 213791060 |          |          |    |   |   |   |   |   |   |    |
| hsa-mir-4438   | NO   | 14 | 1  | 1  | 0  | -1 | 1  | 1  | 0  | 0  | 0  | 0   | 0  | 0  | 0  | 0  | 0  | 0  | 0  | 0  | 0  | 0  | 0  | 0  | 0  | 0  | 0  | 0  | 0  | 0  | 0  | 0  | 0  | 0  | 0  | 0  | 0  | 0  | 0  | 0  | 2         | 214622791 | 214622883 |          |          |    |   |   |   |   |   |   |    |
| hsa-mir-26b    | CONS |    | 1  | 1  | 1  | 1  | 0  | 1  | 1  | 1  | 1  | 0   | 1  | 1  | 1  | 1  | 1  | 1  | 1  | 1  | 1  | 1  | 1  | 0  | 1  | 1  | 1  | 1  | 1  | 1  | 1  | 1  | 1  | 1  | 1  | 1  | 1  | 1  | 1  | 1  | 2         | 219267369 | 219267445 |          |          |    |   |   |   |   |   |   |    |
| hsa-mir-375    | NO   | 14 | 1  | 1  | 1  | 1  | 1  | 1  | 0  | 1  | 1  | 1   | 1  | 1  | 1  | 0  | 1  | 1  | 1  | 1  | 1  | 1  | 1  | 1  | 1  | 1  | 1  | 0  | 0  | 1  | 1  | 0  | 0  | 1  | 1  | 0  | 0  | 0  | 0  | 2  | 219866367 | 219866430 |           |          |          |    |   |   |   |   |   |   |    |
| hsa-mir-3131   | NO   | 14 | 1  | 1  | 1  | -1 | -1 | 1  | 0  | -1 | -1 | 0   | 0  | 0  | 0  | -1 | 0  | 0  | 0  | 0  | 0  | 0  | 0  | 0  | 0  | 0  | 0  | 0  | 0  | 0  | 0  | 0  | 0  | 0  | 0  | 0  | 0  | 0  | 0  | 0  | 2         | 219923410 | 219923472 |          |          |    |   |   |   |   |   |   |    |
| hsa-mir-153-1  | NO   | 14 | 1  | 0  | 0  | 1  | 1  | 1  | 1  | 1  | 1  | 1   | 1  | 1  | 0  | 0  | 1  | 1  | 1  | 1  | 1  | 1  | 1  | 1  | 1  | 1  | 0  | 0  | 1  | 1  | 1  | 1  | 1  | 1  | 1  | 1  | 1  | 1  | 1  | 1  | 2         | 220158833 | 220158922 |          |          |    |   |   |   |   |   |   |    |
| hsa-mir-3132   | NO   | 14 | 1  | 1  | 1  | 1  | 1  | -1 | -1 | 0  | -1 | 0   | -1 | -1 | -1 | -1 | -1 | -1 | -1 | -1 | 0  | 0  | 0  | 0  | -1 | 0  | 0  | 0  | 0  | 0  | 0  | 0  | 0  | 0  | 0  | 0  | 0  | 0  | 0  | 0  | 2         | 220413795 | 220413869 |          |          |    |   |   |   |   |   |   |    |
| hsa-mir-4268   | NO   | 14 | 1  | 1  | 1  | 1  | 1  | 0  | 0  | 0  | 0  | 0   | 0  | 0  | 0  | 0  | 0  | 0  | 0  | 0  | 0  | 0  | 0  | 0  | 0  | 0  | 0  | 0  | 0  | 0  | 0  | 0  | 0  | 0  | 0  | 0  | 0  | 0  | 0  | 0  | 2         | 220771223 | 220771286 |          |          |    |   |   |   |   |   |   |    |
| hsa-mir-4439   | NO   | 14 | 1  | 1  | -1 | -1 | 1  | 0  | 0  | 0  | 0  | 0   | 0  | 0  | 0  | 0  | 0  | 0  | 0  | 0  | 0  | 0  | 0  | 0  | 0  | 0  | 0  | 0  | 0  | 0  | 0  | 0  | 0  | 0  | 0  | 0  | 0  | 0  | 0  | 0  | 2         | 225875178 | 225875257 |          |          |    |   |   |   |   |   |   |    |
| hsa-mir-5702   | NO   | 14 | 1  | 1  | 1  | 1  | 1  | -1 | 1  | 1  | 1  | 1   | 1  | 1  | 0  | 1  | 1  | 1  | 1  | 1  | 1  | 1  | 1  | 1  | 1  | 1  | 0  | 0  | 1  | 1  | 1  | -1 | 0  | 0  | 0  | 0  | 0  | 0  | 0  | 0  | 2         | 227523426 | 227523509 |          |          |    |   |   |   |   |   |   |    |
| hsa-mir-5703   | NO   | 14 | 1  | 1  | 0  | 1  | 1  | 0  | 1  | 0  | 0  | 0   | 0  | 0  | -1 | 0  | 1  | 0  | 1  | 0  | 1  | 0  | 1  | 0  | 1  | 0  | 0  | 0  | 0  | -1 | 0  | 0  | 0  | 0  | 0  | 0  | 0  | 0  | 0  | 0  | 2         | 228336848 | 228336903 |          |          |    |   |   |   |   |   |   |    |
| hsa-mir-4777   |      | 7  | 1  | 1  | 1  | 1  | 1  | 1  | 0  | 0  | 0  | 0   | 0  | 0  | 0  | 0  | 0  | 0  | 0  | 0  | 0  | 0  | 0  | 0  | 0  | 0  | 0  | 0  | 0  | 0  | 0  | 0  | 0  | 0  | 0  | 0  | 0  | 0  | 0  | 0  | 2         | 232227419 | 232227504 |          |          |    |   |   |   |   |   |   |    |
| hsa-mir-1244-1 | NO   | NO | 14 | 0  | 0  | 0  | 0  | 0  | 0  | 0  | 0  | 0   | 0  | 0  | 0  | 0  | 0  | 0  | 0  | 0  | 0  | 0  | 0  | 0  | 0  | 0  | 0  | 0  | 0  | 0  | 0  | 0  | 0  | 0  | 0  | 0  | 0  | 0  | 0  | 0  | 2         | 232578024 | 232578108 |          |          |    |   |   |   |   |   |   |    |
| hsa-mir-1471   | NO   | 14 | 1  | -1 | 1  | 1  | 0  | 0  | -1 | 0  | -1 | 0   | 0  | -1 | -1 | -1 | -1 | -1 | -1 | -1 | -1 | -1 | -1 | -1 | -1 | 0  | 0  | 1  | 1  | 0  | 0  | 0  | 0  | 0  | 0  | 0  | 0  | 0  | 0  | 0  | 2         | 232756952 | 232757008 |          |          |    |   |   |   |   |   |   |    |
| hsa-mir-562    | NO   | 14 | 1  | 1  | 1  | 1  | 0  | 0  | -1 | 0  | 0  | 0   | -1 | -1 | 0  | 0  | 0  | 0  | 0  | -1 | 0  | 0  | 0  | 0  | 0  | 0  | 0  | 0  | 0  | -1 | 0  | 0  | 0  | 0  | 0  | 0  | 0  | 0  | 0  | 2  | 233037363 | 233037457 |           |          |          |    |   |   |   |   |   |   |    |
| hsa-mir-5001   |      | 3  | 1  | 0  | 0  | 1  | -1 | -1 | 1  | -1 | -1 | -1  | -1 | 1  | 0  | -1 | 0  | 0  | 0  | -1 | -1 | -1 | 0  | -1 | -1 | -1 | -1 | -1 | -1 | -1 | -1 | -1 | -1 | -1 | -1 | -1 | -1 | -1 | -1 | 2  | 233415184 | 233415283 |           |          |          |    |   |   |   |   |   |   |    |
| hsa-mir-4440   | NO   | 14 | 1  | 0  | -1 | 0  | 0  | 0  | 0  | 0  | 0  | 0   | 0  | 0  | 0  | 0  | 0  | 0  | 0  | 0  | 0  | 0  | 0  | 0  | 0  | 0  | 0  | 0  | 0  | 0  | 0  | 0  | 0  | 0  | 0  | 0  | 0  | 0  | 0  | 0  | 2         | 239990513 | 239990610 |          |          |    |   |   |   |   |   |   |    |
| hsa-mir-4441   | NO   | 14 | 1  | 1  | -1 | 1  | 1  | 0  | 0  | 0  | 0  | 0   | 0  | 0  | 0  | 0  | 0  | 0  | 0  | 0  | 0  | 0  | 0  | 0  | 0  | 0  | 0  | 0  | 0  | 0  | 0  | 0  | 0  | 0  | 0  | 0  | 0  | 0  | 0  | 0  | 2         | 240007523 | 240007622 |          |          |    |   |   |   |   |   |   |    |
| hsa-mir-4269   | NO   | 14 | 1  | 1  | 1  | 1  | 1  | -1 | 1  | -1 | -1 | -1  | 0  | -1 | 0  | -1 | 0  | -1 | 0  | -1 | 0  | 0  | -1 | 0  | 0  | -1 | 0  | 0  | 0  | -1 | 0  | 0  | 0  | 0  | 0  | 0  | 0  | 0  | 0  | 0  | 2         | 240227157 | 240227240 |          |          |    |   |   |   |   |   |   |    |
| hsa-mir-2467   |      | 3  | 1  | 1  | 1  | 1  | 1  | 1  | 0  | -1 | -1 | -1  | 1  | -1 | 0  | 0  | 0  | 0  | 0  | 0  | -1 | 0  | 0  | 0  | 0  | 0  | 0  | 0  | 0  | 0  | -1 | 0  | 0  | 0  | 0  | 0  | 0  | 0  | 0  | 2  | 240273419 | 240273499 |           |          |          |    |   |   |   |   |   |   |    |
| hsa-mir-4786   |      | 8  | 1  | 1  | 0  | 1  | 1  | 0  | 0  | 0  | 0  | 0   | 0  | 0  | 0  | 0  | 0  | 0  | 0  | 0  | 0  | 0  | 0  | 0  | 0  | 0  | 0  | 0  | 0  | 0  | 1  | 0  | 0  | 0  | 0  | 0  | 0  | 0  | 0  | 2  | 240882432 | 240882511 |           |          |          |    |   |   |   |   |   |   |    |
| hsa-mir-149    |      | 1  | 1  | 1  | 1  | 1  | 1  | 0  | 0  | 1  | 0  | 1   | 1  | 0  | 0  | 0  | 0  | 0  | 0  | 1  | 1  | 1  | 1  | 1  | 1  | 0  | 0  | 0  | 1  | 1  | 0  | 0  | 0  | 0  | 0  | 0  | 0  | 0  | 0  | 0  | 2         | 241395418 | 241395506 |          |          |    |   |   |   |   |   |   |    |
| hsa-mir-3133   | NO   | 14 | 1  | 1  | 1  | 0  | 0  | 1  | 0  | 0  | 0  | 0   | 0  | 0  | 0  | 0  | 0  | 0  | 0  | 0  | 0  | 0  | 0  | 0  | 0  | 0  | 0  | 0  | 0  | 0  | 0  | 0  | 0  | 0  | 0  | 0  | 0  | 0  | 0  | 0  | 2         | 242417320 | 242417397 |          |          |    |   |   |   |   |   |   |    |
| hsa-mir-4790   |      | 7  | 1  | 1  | 1  | -1 | 1  | 1  | 0  | 0  | 0  | 0   | 0  | 0  | 0  | -1 | 0  | 0  | 0  | 0  | 0  | 0  | 0  | 0  | 0  | 0  | 0  | 0  | 0  | 0  | 0  | 0  | 0  | 0  | 0  | 0  | 0  | 0  | 0  | 0  | 3         | 5291862   | 5291940   |          |          |    |   |   |   |   |   |   |    |
| hsa-mir-378b   | NO   | 14 | 1  | 1  | 1  | 1  | 1  | -1 | 0  | 0  | 0  | -1  | 0  | 0  | 0  | 0  | 0  | 0  | 0  | 0  | 0  | 0  | 0  | 0  | 0  | 0  | 0  | 0  | 0  | 0  | 0  | 0  | 0  | 0  | 0  | 0  | 0  | 0  | 0  | 0  | -1        | NA        | NA        | 0        | NA       | NA | 0 | 0 | 0 | 0 | 0 | 0 | NA |
| hsa-mir-885    |      | 1  | 1  | 1  | 0  | 1  | 1  | 0  | 1  | 1  | 1  | 1   | 1  | 0  | 0  | 0  | 1  | 0  | 1  | 1  | 1  | 1  | 1  | 0  | 0  | 0  | 0  | 0  | 1  | 1  | 0  | 0  | 0  | 0  | 0  | 0  | 0  | 0  | 0  | 0  | 0         | 0         | 3         | 10436173 | 10436246 |    |   |   |   |   |   |   |    |
| hsa-mir-4270   | NO   | 14 | 1  | 1  | 1  | 1  | 1  | 0  | 0  | 1  | -1 | -1  | -1 | -1 | 0  | 1  | -1 | -1 | 1  | 1  | 0  | 0  | 1  | 0  | 0  | 1  | 0  | 0  | 0  | 1  | 0  | 0  | 0  | 0  | 0  | 0  | 0  | 0  | 0  | 0  | 0         | 3         | 15537746  | 15537815 |          |    |   |   |   |   |   |   |    |
| hsa-mir-3134   | NO   | 14 | 1  | 1  | 1  | 0  | -1 | -1 | 0  | 0  | 0  | 0   | 0  | 0  | 0  | 0  | 0  | 0  | 0  | 0  | 0  | 0  | 0  | 0  | 0  | 0  | 0  | 0  | 0  | 0  | 0  | 0  | 0  | 0  | 0  | 0  | 0  | 0  | 0  | 0  | 0         | 3         | 15738805  | 15738878 |          |    |   |   |   |   |   |   |    |
| hsa-mir-563    | NO   | 14 | 1  | 1  | 1  | 1  | -1 | 0  | 0  | 0  | 0  | 0   | 0  | 0  | -1 | 0  | -1 | 0  | -1 | 0  | 0  | 0  | 0  | 0  | 0  | 0  | 0  | 0  | 0  | 0  | 0  | 0  | 0  | 0  | 0  | 0  | 0  | 0  | 0  | 0  | 3         | 15915278  | 15915356  |          |          |    |   |   |   |   |   |   |    |
| hsa-mir-3714   | NO   | 14 | 1  | 1  | 1  | 1  | 1  | 0  | -1 | 0  | 0  | 0   | 0  | -1 | -1 | 0  | 0  | 0  | 0  | 0  | 0  | 0  | 0  | 0  | 1  | 1  | 0  | -1 | 0  | 0  | 0  | 0  | 0  | 0  | 0  | 0  | 0  | 0  | 0  | 0  | 3         | 16974688  | 16974752  |          |          |    |   |   |   |   |   |   |    |
| hsa-mir-4791   | NO   | 14 | 1  | 1  | 1  | 1  | 1  | 0  | 0  | 0  | 0  | 0   | 0  | 0  | 0  | 0  | 0  | 0  | 0  | 0  | 0  | 0  | 0  | 0  | 0  | 0  | 0  | 0  | 0  | 0  | 0  | 0  | 0  | 0  | 0  | 0  | 0  | 0  | 0  | 0  | 3         | 19356340  | 19356423  |          |          |    |   |   |   |   |   |   |    |
| hsa-mir-3135a  | NO   | 14 | 1  | 0  | 0  | 0  | 1  | 0  | 0  | 0  | 0  | 0   | 0  | 0  | 0  | 0  | 0  | 0  | 0  | 0  | 0  | 0  | 0  | 0  | 0  | 0  | 0  | 0  | 0  | 0  | 0  | 0  | 0  | 0  | 0  | 0  | 0  | 0  | 0  | 0  | 3         | 20179057  | 20179133  |          |          |    |   |   |   |   |   |   |    |
| hsa-mir-4792   | NO   | 14 | 1  | 1  | 1  | 1  | 1  | -1 | 0  | -1 | -1 | 0</ |    |    |    |    |    |    |    |    |    |    |    |    |    |    |    |    |    |    |    |    |    |    |    |    |    |    |    |    |           |           |           |          |          |    |   |   |   |   |   |   |    |





|                 |    |      |    |                          |                      |                                |                 |                 |                 |                |                |               |           |           |           |           |           |
|-----------------|----|------|----|--------------------------|----------------------|--------------------------------|-----------------|-----------------|-----------------|----------------|----------------|---------------|-----------|-----------|-----------|-----------|-----------|
| hsa-mir-1244-2  | NO | NO   | 14 | 0 0 0 0 0 0 0 0 0 0      | 0 0 0 0 0 0 0 0      | 0 0 0 0 0 0 0 0                | 0 0 0 0 0 0 0 0 | 0 0 0 0 0 0 0 0 | 0 0 0 0 0 0 0 0 | NA 0 0         | NA 0           | 0 NA NA NA NA | 0         | 5         | 118310281 | 118310365 |           |
| hsa-mir-5706    | NO |      | 14 | 1 -1 1 1 0 1 1 0 0 0     | 0 0 0 0 0 0 0 0      | 0 0 0 0 0 0 0 0                | 0 0 0 0 0 0 0 0 | 0 0 0 0 0 0 0 0 | 0 0 0 0 0 0 0 0 | 0 0 0 0 0 0    |                |               |           |           | 5         | 118490332 | 118490411 |
| hsa-mir-4633    |    |      | 7  | 1 1 1 1 1 1 1 0 0 0      | 0 0 0 0 0 0 0 0      | 0 0 0 0 0 0 0 0                | 0 0 0 0 0 0 0 0 | 0 0 0 0 0 0 0 0 | 0 0 0 0 0 0 0 0 |                |                |               |           | 5         | 128433381 | 128433459 |           |
| hsa-mir-4460    | NO |      | 14 | 1 1 -1 -1 1 -1 1 0 0 0   | 0 0 0 0 0 0 0 0      | 0 0 0 0 0 0 0 0                | 0 0 0 0 0 0 0 0 | 0 0 0 0 0 0 0 0 | 0 0 0 0 0 0 0 0 |                |                |               |           | 5         | 128732755 | 128732840 |           |
| hsa-mir-3936    | NO |      | 14 | 1 -1 -1 -1 -1 -1 0 0 0   | 0 0 0 0 0 0 0 0      | 0 0 0 0 0 0 0 0                | 0 0 0 0 0 0 0 0 | 0 0 0 0 0 0 0 0 | 0 0 0 0 0 0 0 0 |                |                |               |           | 5         | 131701182 | 131701291 |           |
| hsa-mir-1289-2  | NO |      | 14 | 1 1 1 1 1 1 -1 0 -1 0    | 0 0 0 0 0 -1 -1 0    | -1 1 -1 0 -1 -1 0              | 0 0 0 0 0 0 0 0 | 0 -1 0 -1 0     | NA NA NA        | NA NA          | NA NA NA NA NA | NA            | 5         | 132763288 | 132763398 |           |           |
| hsa-mir-3661    | NO |      | 14 | 1 1 0 1 1 1 1 1 1 1      | 1 1 1 -1 -1 1 1      | 1 -1 1 0 1 1 0 0               | 0 0 0 0 1 1 0 0 | -1 -1 1 1 1     | NA 0 1          | NA 1           | 0 NA NA NA NA  | -1            | 5         | 133561448 | 133561543 |           |           |
| hsa-mir-4461    | NO |      | 14 | 1 0 0 0 0 0 0 0 0 0      | 0 0 0 0 0 0 0 0      | 0 0 0 0 0 0 0 0                | 0 0 0 0 0 0 0 0 | -1 0 0 0 0      |                 |                |                |               | 5         | 134263729 | 134263802 |           |           |
| hsa-mir-5692c-1 | NO |      | 14 | 1 1 0 0 0 0 0 0 0 0      | 0 0 0 0 0 0 0 0      | 0 0 0 0 0 0 0 0                | 0 0 0 0 0 0 0 0 | 0 0 0 0 0 0 0 0 |                 |                |                |               | 5         | 135138674 | 135138764 |           |           |
| hsa-mir-874     | NO |      | 14 | 1 1 1 1 1 1 1 1 1 1      | 1 1 1 1 1 1 1 1      | 1 1 1 1 1 1 1 1                | 1 1 1 1 1 1 1 1 | 1 1 1 0 0       | NA NA NA        | NA NA          | NA NA NA NA NA | NA            | 5         | 136983261 | 136983338 |           |           |
| hsa-mir-3655    | NO |      | 14 | 1 1 1 -1 -1 1 -1 0 -1 -1 | -1 -1 -1 0 -1 -1 1   | -1 -1 -1 -1 1 1 -1 -1 -1 -1 -1 | -1 0 -1 -1 -1   |                 |                 |                |                | 5             | 140027429 | 140027511 |           |           |           |
| hsa-mir-5197    |    |      | 2  | 1 1 1 1 1 1 1 1 -1 1     | 0 -1 -1 0 0 0 1 1    | 0 1 -1 1 1 -1 1 1 1 1 -1 -1    | 0 1 -1 0 0      | NA 0 0          | NA 0            | NA NA NA NA NA | NA             | 5             | 143059425 | 143059536 |           |           |           |
| hsa-mir-584     |    |      | 7  | 1 1 1 1 1 1 1 1 0 -1 -1  | -1 -1 -1 -1 -1 -1 -1 | -1 -1 -1 0 -1 -1 -1            | -1 0 -1 0 -1    |                 |                 |                |                | 5             | 148441876 | 148441972 |           |           |           |
| hsa-mir-143     |    |      | -1 | 1 1 1 1 1 1 1 1 0 0 1    | 0 1 1 1 1 1 1 1 0    | 0 1 0 1 1 1 1 1 1 0 1          | 1 1 1 0 1       | NA 0 1          | NA 1            | NA NA NA NA NA | NA             | 5             | 148808481 | 148808586 |           |           |           |
| hsa-mir-145     |    | CONS | 1  | 1 1 1 1 1 1 1 1 0 1 1    | 1 1 1 1 1 1 1 1 1    | 1 1 0 1 1 1 1 1 1 1 1          | 0 1 1 1 1       | NA 1 1          | NA 1            | 1 NA NA NA NA  | NA             | 5             | 148810209 | 148810296 |           |           |           |
| hsa-mir-378a    |    |      | 1  | 1 1 0 1 1 1 1 0 0 1 0    | 0 1 1 1 1 1 1 1 1    | 1 1 0 1 1 1 1 1 1 1 0          | 0 0 1 1 1       | NA NA NA        | NA NA           | NA NA NA NA NA | NA             | 5             | 149112388 | 149112453 |           |           |           |
| hsa-mir-1294    | NO |      | 14 | 1 1 1 0 1 -1 1 0 -1 0    | 0 0 0 0 -1 -1 0 0    | 0 0 -1 -1 0 0 0 -1 0 0 0       | 0 0 0 0 0       |                 |                 |                |                | 5             | 153726666 | 153726807 |           |           |           |
| hsa-mir-3141    | NO |      | 14 | 1 0 -1 0 0 -1 -1 0 -1 -1 | 0 0 0 0 -1 0 0 0     | -1 -1 0 0 -1 -1 -1 -1 0 0      | 0 0 0 0 -1      |                 |                 |                |                | 5             | 153975572 | 153975632 |           |           |           |
| hsa-mir-1303    | NO |      | 14 | 1 0 1 0 0 1 1 1 0 0 0    | 0 0 0 0 0 0 0 0      | 0 0 0 0 0 0 0 0                | 0 0 0 0 0 0 0 0 |                 |                 |                |                | 5             | 154065336 | 154065421 |           |           |           |
| hsa-mir-378h    | NO |      | 14 | 1 1 1 1 1 1 0 0 0 0      | 0 -1 0 0 0 -1 -1 0   | 0 0 0 0 -1 -1 1 1 1 -1 0       | 0 0 0 0 0       |                 |                 |                |                | 5             | 154209018 | 154209100 |           |           |           |
| hsa-mir-3142    | NO |      | 14 | 1 0 1 0 0 0 0 0 0 0      | 0 0 0 0 0 0 0 0      | 0 0 0 0 0 0 0 0                | 0 0 0 0 0 0 0 0 |                 |                 |                |                | 5             | 159901409 | 159901490 |           |           |           |
| hsa-mir-146a    |    | CONS | 14 | 1 1 1 1 1 1 1 1 1 1 1    | 1 1 0 1 1 1 1 0      | 0 1 1 0 1 1 0 1 1 1 0 0        | 1 1 1 1 0       | NA 0 1          | NA 1            | 1 NA NA NA NA  | NA             | 5             | 159912359 | 159912457 |           |           |           |
| hsa-mir-103a-1  | NO |      | 14 | 1 1 1 1 1 1 0 1 1 1 1    | 0 0 1 1 1 1 1 1      | 1 0 -1 0 0 1 1 0 1 1 1 1 1     | 1 1 1 1 1       | NA 0 1          | NA 1            | 1 NA NA NA NA  | 1              | 5             | 167987901 | 167987978 |           |           |           |
| hsa-mir-103b-1  | NO | NO   | 14 | 0 0 0 0 0 0 0 0 0 0      | 0 0 0 0 0 0 0 0      | 0 0 0 0 0 0 0 0                | 0 0 0 0 0       | NA 0 1          | NA 1            | 1 NA NA NA NA  | 1              | 5             | 167987909 | 167987970 |           |           |           |
| hsa-mir-218-2   |    | CONS | 14 | 1 1 1 1 1 1 1 1 1 1 1    | 1 1 1 1 1 1 1 1 1    | 1 1 1 1 1 1 1 1 1 1 1 1        | 1 1 1 1 1       | NA 1 1          | NA 1            | 1 NA NA NA NA  | 1              | 5             | 168195151 | 168195260 |           |           |           |
| hsa-mir-378e    | NO |      | 14 | 1 1 1 1 1 1 -1 -1 -1 -1  | -1 0 0 0 -1 1 1 1    | -1 -1 1 -1 0 -1 -1 1 0 0 0     | 0 0 0 0 0       | NA NA NA        | NA NA           | NA NA NA NA NA | NA             | 5             | 169455492 | 169455570 |           |           |           |
| hsa-mir-3912    | NO |      | 14 | 1 0 1 1 0 1 0 0 0 0      | 0 0 0 0 0 0 0 0      | 0 0 0 0 0 0 0 0                | 0 0 0 0 0       |                 |                 |                |                | 5             | 170813660 | 170813764 |           |           |           |
| hsa-mir-5003    |    |      | 7  | 1 1 1 1 1 1 1 0 0 0      | 0 0 0 0 0 -1 0       | -1 -1 0 -1 0 -1 -1 0 0 0       | 0 1 0 0 0       | NA NA NA        | NA NA           | NA NA NA NA NA | NA             | 5             | 172089168 | 172089266 |           |           |           |
| hsa-mir-4634    | NO |      | 14 | 1 1 1 1 1 1 1 0 0 0 -1   | 0 0 0 0 0 0 0 0      | 0 0 0 0 0 0 0 0                | 0 -1 -1 0 -1    |                 |                 |                |                | 5             | 174178737 | 174178790 |           |           |           |
| hsa-mir-1271    |    |      | 2  | 1 1 1 1 1 1 1 0 0 0 1    | 1 1 1 0 1 0 1 1      | 1 1 0 1 1 0 1 1 1 0 0          | 0 0 1 0 0       | NA NA NA        | NA NA           | NA NA NA NA NA | NA             | 5             | 175794949 | 175795034 |           |           |           |
| hsa-mir-4281    | NO |      | 14 | 1 0 1 0 1 1 -1 0 -1 0    | 0 0 0 -1 0 0 0 0     | 0 -1 0 0 0 0 0 0 -1 -1 0 0     | 0 0 0 0 0       |                 |                 |                |                | 5             | 176056440 | 176056501 |           |           |           |
| hsa-mir-1229    | NO |      | 14 | 1 0 -1 -1 -1 0 0 -1 -1   | 0 0 0 0 -1 -1 -1 0   | -1 0 -1 0 0 -1 -1 0 -1 -1 0    | 0 0 0 -1 0      |                 |                 |                |                | 5             | 179225278 | 179225346 |           |           |           |
| hsa-mir-340     |    |      | 1  | 1 1 1 1 1 1 1 0 1 1      | 0 0 1 1 1 1 1 1      | 1 1 1 1 1 1 1 0 1 1 1 0        | 1 0 1 0 1       | NA NA NA        | NA NA           | NA NA NA NA NA | NA             | 5             | 179442303 | 179442397 |           |           |           |
| hsa-mir-4638    |    |      | 9  | 1 0 1 0 1 0 -1 0 0 0     | 0 0 0 0 0 0 0 0      | 0 0 0 0 0 0 -1 0 -1 -1 0 0     | 0 0 0 0 0       |                 |                 |                |                | 5             | 180649566 | 180649633 |           |           |           |
| hsa-mir-4645    |    |      | 8  | 1 1 1 1 1 1 -1 0 0 0     | 0 0 0 0 0 0 0 0      | 0 0 0 0 0 0 0 0 0 0 0 0        | 0 0 0 0 0       |                 |                 |                |                | 6             | 2854265   | 2854341   |           |           |           |
| hsa-mir-3691    |    |      | 9  | 1 1 1 1 1 1 0 0 0 0      | 0 0 0 0 -1 0 1       | 0 0 0 0 0 0 0 0 0 0 0 0        | 0 0 0 0 0       |                 |                 |                |                | 6             | 5148467   | 5148556   |           |           |           |
| hsa-mir-5683    | NO |      | 14 | 1 1 1 1 -1 1 -1 0 0 0    | 0 0 0 0 -1 0 0 0     | 0 0 0 0 0 0 0 0 0 -1 0 0       | 0 0 0 0 0       |                 |                 |                |                | 6             | 6169567   | 6169642   |           |           |           |
| hsa-mir-5689    | NO |      | 14 | 1 1 1 -1 0 -1 0 0 0 0    | 0 0 0 0 0 0 0 0      | 0 0 0 0 0 0 0 0 0 0 0 0        | 0 0 0 0 0       |                 |                 |                |                | 6             | 10439950  | 10440027  |           |           |           |
| hsa-mir-548a-1  | NO |      | 14 | 1 1 1 1 1 1 -1 0 0 0     | 0 0 0 0 0 0 0 0      | 0 0 0 0 0 0 0 0 0 0 0 0        | 0 0 0 0 0       |                 |                 |                |                | 6             | 18572015  | 18572111  |           |           |           |
| hsa-mir-3143    | NO | NO   | 14 | 0 1 0 0 0 0 0 0 0 0      | 0 0 0 0 0 0 0 0      | 0 0 0 0 0 0 0 0 0 0 0 0        | 0 0 0 0 0       |                 |                 |                |                | 6             | 27115405  | 27115467  |           |           |           |
| hsa-mir-877     |    |      | 1  | 1 1 1 1 1 1 1 0 1 1      | 0 0 1 1 -1 1 1 1     | 1 1 1 0 1 1 1 0 1 1 0 -1       | 0 0 1 1 1       | -1 NA NA        | 0 NA            | NA 0 0 0       | -1 NA          | 6             | 30552109  | 30552194  |           |           |           |
| hsa-mir-4640    |    |      | 2  | 1 1 1 1 1 1 -1 -1 0 1 1  | -1 -1 0 0 -1 1 -1    | 1 1 0 -1 1 -1 1 1 1 -1 -1 -1   | 0 0 -1 -1 0     |                 |                 |                |                | 6             | 30858660  | 30858749  |           |           |           |
| hsa-mir-4646    |    |      | 2  | 1 1 1 1 1 1 1 0 0 0      | 0 0 0 -1 -1 0 0      | 0 -1 0 0 1 0 0 1 1 0 0 1       | -1 0 -1 -1 1    | 0 NA NA         | -1 NA           | NA 0 0 0 0     | NA             | 6             | 31668806  | 31668868  |           |           |           |
| hsa-mir-1236    | NO |      | 14 | 1 1 1 1 1 1 1 1 1 1 0    | -1 -1 -1 0 -1 -1     | -1 -1 0 -1 -1 0 -1 -1 -1 -1 -1 | -1 -1 0 0       |                 |                 |                |                | 6             | 31924616  | 31924717  |           |           |           |
| hsa-mir-3135b   | NO |      | 14 | 1 1 1 0 0 0 0 0 0 0      | 0 0 0 0 0 0 0 0      | 0 0 0 0 0 0 0 0 0 0 0 0        | 0 0 0 0 0       |                 |                 |                |                | 6             | 32717689  | 32717756  |           |           |           |
| hsa-mir-219-1   |    |      | 2  | 1 1 1 1 1 1 1 0 1 1      | 1 1 1 0 0 1 1        | 1 0 0 1 1 1 1 0 1 1 0 0 0      | 0 0 1 0 0       | NA 0 1          | NA 1            | NA NA NA NA NA | NA             | 6             | 33175612  | 33175721  |           |           |           |
| hsa-mir-5004    |    |      | 2  | 1 1 1 1 1 1 1 -1 1 1     | 0 -1 -1 1 -1 0 -1 0  | -1 -1 0 -1 1 1 1 1 1 0 0 -1    | 0 -1 -1 1 -1    | -1 NA NA        | 0 NA            | NA 0 0 0 0     | NA             | 6             | 33406108  | 33406214  |           |           |           |
| hsa-mir-3934    | NO |      | 14 | 1 1 1 1 1 1 1 0 -1 -1    | 0 0 -1 -1 -1 0 0     | -1 -1 -1 -1 -1 -1 -1 -1 0 0    | 0 -1 -1 0 0     |                 |                 |                |                | 6             | 33665905  | 33666011  |           |           |           |
| hsa-mir-1275    | NO |      | 14 | 1 1 1 1 1 1 -1 0 0 0     | 0 0 0 0 -1 0 0 0     | 0 0 0 0 0 0 0 0 0 0 0 0        | 0 0 0 0 0       |                 |                 |                |                | 6             | 33967749  | 33967828  |           |           |           |
| hsa-mir-5690    | NO |      | 14 | 1 1 0 1 1 0 -1 0 0 0     | 0 0 0 0 0 0 0 0      | 0 0 0 0 0 0 0 0 0 0 0 0        | 0 0 0 0 0       |                 |                 |                |                | 6             | 35632494  | 35632566  |           |           |           |
| hsa-mir-3925    |    |      | 8  | 1 1 1 1 1 1 0 0 0 0      | 0 0 0 0 0 0 0 0      | 0 -1 0 0 -1 0 0 -1 0 0 0 0     | 0 0 0 0 0       |                 |                 |                |                | 6             | 36590213  | 36590289  |           |           |           |
| hsa-mir-4462    | NO |      | 14 | 1 1 1 1 1 -1 0 -1 -1     | -1 -1 0 0 0 0 0      | -1 -1 0 -1 -1 0 0 -1 -1 0 0    | 0 0 -1 -1 0     |                 |                 |                |                | 6             | 37523141  | 37523198  |           |           |           |
| hsa-mir-4641    | NO |      | 14 | 1 1 1 -1 1 1 -1 0 0 0    | -1 0 -1 0 0 0 -1     | 0 -1 0 -1 0 0 0 -1 0 0 0       | 0 0 0 0 -1      |                 |                 |                |                | 6             | 41566461  | 41566526  |           |           |           |
| hsa-mir-4647    | NO |      | 14 | 1 0 0 0 1 1 0 -1 1 -1    | 0 0 0 -1 0 0 0 0     | -1 0 0 -1 -1 1 -1 1 -1 0       | -1 -1 1 -1      | 0 NA NA         | 0 NA            | NA 0 0 0 0     | NA             | 6             | 44221943  | 44222022  |           |           |           |
| hsa-mir-4642    | NO |      | 14 | 1 1 1 0 0 -1 1 0 0 0     | -1 -1 0 0 0 0 0      | 0 0 0 0 0 0 0 0 0 0 0 0        | 0 0 0 0 0       |                 |                 |                |                | 6             | 44403378  | 44403459  |           |           |           |
| hsa-mir-586     | NO |      | 14 | 1 1 1 1 1 1 1 0 0 0      | 0 0 0 0 0 0 0 0      | 0 0 0 0 0 0 0 0 0 0 0 0        | 0 0 0 0 0       |                 |                 |                |                | 6             | 45165411  | 45165507  |           |           |           |
| hsa-mir-206     | NO |      | 14 | 1 1 1 1 1 1 0 0 1 1      | 0 0 1 1 1 1 1 1      | 1 0 1 0 1 1 1 1 1 1 1 1        | 1 1 1 1 1       | 1 NA NA         | 0 NA            | NA 1 1 1 1     | NA             | 6             | 52009147  | 52009232  |           |           |           |
| hsa-mir-133b    | NO |      | 14 | 1 1 1 1 1 1 0 1 1 1      | 1 0 0 1 1 1 1 1      | 1 0 0 1 0 0 1 1 1 1 1 1        | 1 0 1 1 1       | 1 NA NA         | 0 NA            | NA 1 0 1 1     | NA             | 6             | 52013721  | 52013839  |           |           |           |
| hsa-mir-5685    | NO |      | 14 | 1 1 1 0 0 0 -1 0 0 0     | -1 -1 0 0 0 0 0      | 0 -1 0 0 -1 0 0 -1 0 0 0       | 0 0 0 0 0       |                 |                 |                |                | 6             | 53141791  | 53141869  |           |           |           |
| hsa-mir-548u    | NO |      | 14 | 1 1 1 0 1 1 1 0 0 0      | 0 0 0 0 0 0 0 0      | 0 0 0 0 0 0 0 0 0 0 0 0        | 0 0 0 0 0       |                 |                 |                |                | 6             | 57254930  | 57255010  |           |           |           |
| hsa-mir-30c-2   |    |      | 1  | 1 1 1 1 1 1 1 0 1 1      | 1 1 1 1 1 1 1 1      | 1 1 1 1 1 1 0 1 1 1 1 1        | 1 0 1 1 0       | 0 NA NA         | 0 NA            | NA 0 0 0 0     | NA             | 6             | 72086663  | 72086734  |           |           |           |
| hsa-mir-30a     |    |      | 1† | 1 1 1 1 1 1 1 1 1 1      | 1 1 1 1 1 1 1 1      | 1 1 0 1 1 1 1 -1 0             | 1 1 1 1 0       | 0 NA NA         | 0 NA            | NA 0 0 0 0     | NA             | 6             | 72113254  | 72113324  |           |           |           |







|                 |      |    |                            |                         |                                   |                           |             |      |    |     |    |    |    |    |           |           |           |           |          |
|-----------------|------|----|----------------------------|-------------------------|-----------------------------------|---------------------------|-------------|------|----|-----|----|----|----|----|-----------|-----------|-----------|-----------|----------|
| hsa-mir-5680    | NO   | 14 | 1 1 1 0 0 0 1 0 0 0 0      | 0 0 0 -1 0 0 0          | 0 0 0 0 0 0 0 0 0 0 0 0 0         | 0 0 0 0 0 0               |             |      |    |     |    |    |    |    | 8         | 103137660 | 103137743 |           |          |
| hsa-mir-3151    | NO   | 14 | 1 1 1 1 0 -1 0 -1 0 0 0    | 0 0 0 0 0 0 0 0 0       | 0 0 0 0 0 0 0 0 0 0 0 0 0         | 0 0 0 0 0 0               |             |      |    |     |    |    |    |    | 8         | 104166842 | 104166917 |           |          |
| hsa-mir-548a-3  |      | 8  | 1 -1 1 0 1 1 -1 0 0 0 0    | 0 0 0 0 1 1 -1 0        | 0 0 0 0 0 0 0 0 0 0 0 0 0         | 0 0 0 0 0 0               |             |      |    |     |    |    |    |    | 8         | 105496597 | 105496693 |           |          |
| hsa-mir-2053    | NO   | 14 | 1 1 1 1 1 1 0 0 1 0 1 1    | 0 0 0 1 1 -1 0          | 1 0 1 0 1 0 1 0 0 0 1 0           | 1 1 1 0 0                 | NA 0 1      | NA 1 | NA | NA  | NA | NA | NA | NA | 8         | 113655722 | 113655812 |           |          |
| hsa-mir-3610    | NO   | 14 | 1 1 1 1 1 1 1 0 1 1 0      | 1 1 0 1 0 -1 0          | 1 1 0 0 1 1 0 1 1 1 1 -1          | 0 1 1 0 0                 | NA 0 1      | NA   | NA | 0   | NA | NA | NA | NA | 8         | 11786967  | 117887039 |           |          |
| hsa-mir-4663    | NO   | 14 | 1 1 1 -1 -1 -1 0 0 1 -1 0  | 0 0 0 0 -1 -1 0         | -1 0 -1 -1 0 0 -1 -1 0 0 0 0      | 0 0 1 1 0                 | NA          | NA   | NA | NA  | NA | NA | NA | NA | 8         | 124228028 | 124228103 |           |          |
| hsa-mir-548d-1  |      | 7  | 1 -1 1 1 1 1 1 1 0 0 0 0   | -1 -1 0 0 0 0 0         | 0 0 0 0 0 0 0 0 0 0 0 0 0         | 0 0 0 0 0 0               |             |      |    |     |    |    |    |    | 8         | 124360274 | 124360370 |           |          |
| hsa-mir-548aa-1 | NO   | 14 | 1 1 1 1 1 1 -1 -1 0 0 0 0  | -1 -1 0 0 0 0 0         | 0 0 0 0 0 0 0 0 0 0 0 0 0         | 0 0 0 0 0 0               |             |      |    |     |    |    |    |    | 8         | 124360274 | 124360370 |           |          |
| hsa-mir-4662b   | NO   | 14 | 1 1 1 -1 -1 1 0 0 0 0 0 0  | 0 0 0 0 0 0 0 0 0       | 0 0 0 0 0 0 0 0 0 0 0 0 0         | 0 0 0 0 0 0               |             |      |    |     |    |    |    |    | 8         | 125834220 | 125834300 |           |          |
| hsa-mir-4662a   |      | 8  | 1 1 1 1 1 1 1 0 0 0 0 0    | 0 0 0 0 0 0 0 0 0       | 0 0 0 0 0 0 0 0 0 0 0 0 0         | 0 0 0 0 0 0               |             |      |    |     |    |    |    |    | 8         | 125834227 | 125834293 |           |          |
| hsa-mir-1204    | NO   | 14 | 1 1 1 1 1 1 0 -1 1 0 0     | 1 0 0 0 0 -1 0          | 1 -1 0 1 1 1 1 1 1 1 1 0 -1       | 1 1 1 -1 0                | NA          | NA   | NA | NA  | NA | NA | NA | NA | 8         | 128808208 | 128808274 |           |          |
| hsa-mir-1205    | NO   | 14 | 1 1 1 1 1 1 0 0 0 0 0 0    | 0 0 0 -1 0 -1 -1        | 0 0 0 0 0 0 0 0 0 0 0 0 0         | -1 -1 -1 -1               |             |      |    |     |    |    |    |    | 8         | 128972879 | 128972941 |           |          |
| hsa-mir-1206    | NO   | NO | 14                         | 0 0 0 0 0 0 0 0 0 0 0 0 | 0 0 0 0 0 0 0 0 0                 | -1 0 -1 0 0 0 0 0 0 0 0 0 | 0 0 0 0 0   |      |    |     |    |    |    | 8  | 129021144 | 129021202 |           |           |          |
| hsa-mir-1207    |      | 1  | 1 1 1 1 1 1 1 -1 0 1 1 1   | 0 0 1 1 -1 1 1          | 1 1 1 1 1 1 1 -1 1 -1 1 0 0       | 0 -1 1 1 1                | NA          | 0 0  | NA | 0   | NA | NA | NA | NA | NA        | 8         | 129061398 | 129061484 |          |
| hsa-mir-1208    | NO   | 14 | 1 1 1 1 1 1 1 0 0 0 0 0    | 0 0 0 0 0 0 0 0 0       | 0 0 1 0 0 0 0 0 0 0 0 0 0         | 0 0 0 0 0 0               |             |      |    |     |    |    |    |    | 8         | 129162362 | 129162434 |           |          |
| hsa-mir-3686    | NO   | 14 | 1 1 1 1 1 1 1 -1 0 0 0 0   | 0 0 0 0 0 0 0 0 0       | 0 0 0 0 0 0 0 0 0 0 0 0 0         | 0 0 0 0 0 0               |             |      |    |     |    |    |    |    | 8         | 130496303 | 130496388 |           |          |
| hsa-mir-3673    | NO   | 14 | 1 0 0 0 0 0 0 0 0 0 0 0    | 0 0 0 0 0 0 0 0 0       | 0 0 0 0 0 0 0 0 0 0 0 0 0         | 0 0 0 0 0 0               |             |      |    |     |    |    |    |    | 8         | 130508088 | 130508189 |           |          |
| hsa-mir-3669    | NO   | 14 | 1 0 0 0 0 0 0 0 0 0 0 0    | 0 0 0 0 0 0 0 0 0       | 0 0 0 0 0 0 0 0 0 0 0 0 0         | 0 0 0 0 0 0               |             |      |    |     |    |    |    |    | 8         | 130509594 | 130509674 |           |          |
| hsa-mir-5194    | NO   | 14 | 1 1 1 1 1 1 1 0 0 -1 -1 -1 | 0 0 -1 -1 -1 -1 0       | -1 0 0 0 0 -1 0 0 -1 -1 -1 0      | 0 -1 -1 -1                |             |      |    |     |    |    |    |    | 8         | 131020580 | 131020699 |           |          |
| hsa-mir-30b     | CONS | 1  | 1 1 1 1 1 1 1 1 1 0 1 1    | 1 1 1 1 1 1 1 1 1       | 1 1 1 0 1 1 1 1 1 1 1 1 1 1       | 1 1 1 1 1 0               | NA          | 0 1  | NA | 1 1 | NA | NA | NA | NA | NA        | 8         | 135812763 | 135812850 |          |
| hsa-mir-30d     | CONS | 1  | 1 1 1 1 1 1 1 1 1 1 1 1    | 1 1 1 1 1 1 1 1 1       | 1 1 1 1 1 1 1 1 1 1 1 1 1 1       | 1 0 1 1 0                 | NA          | 1 1  | NA | 1 1 | NA | NA | NA | NA | NA        | 8         | 135817119 | 135817188 |          |
| hsa-mir-151a    |      | 1  | 1 1 1 1 1 1 1 0 0 1 1 0    | 1 1 1 1 1 1 -1 0        | 1 1 0 0 1 1 1 1 1 1 1 0 0 0       | 0 1 0 1 1 1               | NA          | NA   | NA | NA  | NA | NA | NA | NA | NA        | 8         | 141742663 | 141742752 |          |
| hsa-mir-1302-7  | NO   | NO | 14                         | 0 0 0 1 0 0 0 0 0 0 0 0 | 0 0 0 0 0 0 0 0 0                 | 0 0 0 0 0 0 0 0 0 0 0 0 0 | 0 0 0 0 0 0 |      |    |     |    |    |    |    | 8         | 142867603 | 142867674 |           |          |
| hsa-mir-4472-1  | NO   | 14 | 1 1 1 1 -1 1 0 0 0 -1 0    | 0 -1 0 -1 0 0 0         | -1 -1 0 0 0 -1 -1 -1 0 0 1 0      | 0 0 0 0 0                 |             |      |    |     |    |    |    |    | 8         | 143257790 | 143257779 |           |          |
| hsa-mir-4664    |      | 8  | 1 0 0 0 1 1 0 0 0 0 0 0    | 0 0 0 0 0 0 0 0 0       | 0 0 0 0 0 0 -1 -1 0 0 0 0         | 0 1 0 0 0                 | NA          | NA   | NA | NA  | NA | 0  | NA | NA | NA        | 8         | 144815253 | 144815323 |          |
| hsa-mir-937     | NO   | 14 | 1 1 1 1 1 -1 -1 -1 -1 0 0  | -1 0 -1 -1 -1 0 -1      | -1 -1 0 0 -1 -1 -1 -1 0 0 -1 0    | 0 0 -1 -1 0               |             |      |    |     |    |    |    |    | 8         | 144895127 | 144895212 |           |          |
| hsa-mir-661     | NO   | 14 | 1 1 1 1 -1 1 0 0 1 -1 -1   | -1 1 0 0 -1 0 -1 -1     | -1 -1 0 0 -1 -1 0 0 -1 -1 0 0     | 0 0 0 -1 0                |             |      |    |     |    |    |    |    | 8         | 145019359 | 145019447 |           |          |
| hsa-mir-939     | NO   | 14 | 1 0 0 0 1 0 -1 0 -1 -1 0   | -1 -1 -1 1 -1 0 1       | -1 -1 0 -1 -1 -1 -1 -1 -1 -1 -1   | 0 0 -1 -1 -1              |             |      |    |     |    |    |    |    | 8         | 145619364 | 145619445 |           |          |
| hsa-mir-1234    | NO   | 14 | 1 0 0 0 1 0 -1 0 1 -1 -1   | -1 -1 -1 -1 0 0 -1      | -1 -1 0 -1 -1 -1 -1 -1 -1 0 -1 -1 | 0 0 -1 -1 -1              |             |      |    |     |    |    |    |    | 8         | 145625476 | 145625559 |           |          |
| hsa-mir-101-2   | NO   | 14 | 1 1 1 1 1 1 1 1 1 1 1 1    | 1 1 1 1 1 1 1 1 1       | 1 1 1 1 1 1 1 1 1 1 1 1 1 1       | 1 1 1 1 1 1               | 1           | NA   | NA | 1   | NA | NA | 1  | 0  | 1         | 1         | 9         | 4850297   | 4850375  |
| hsa-mir-4665    |      | 2  | 1 1 0 1 1 1 0 0 0 0 1 -1   | 0 0 1 0 0 -1 0          | -1 0 0 0 -1 0 1 0 0 1 0 0 0       | 0 0 0 0 0                 |             |      |    |     |    |    |    |    | 9         | 6007826   | 6007904   |           |          |
| hsa-mir-3152    |      | 7  | 1 1 1 0 1 1 1 1 0 0 0 0    | 0 0 0 0 0 0 0 0 0       | 0 0 0 0 0 0 0 0 0 0 0 0 0         | 0 0 0 0 0 0               |             |      |    |     |    |    |    |    | 9         | 18573304  | 18573377  |           |          |
| hsa-mir-4473    | NO   | 14 | 1 1 1 -1 -1 -1 1 0 0 0 0   | 0 0 0 0 0 0 0 0 0       | 0 0 0 0 0 0 0 0 0 0 0 0 0         | 0 0 0 0 0 0               |             |      |    |     |    |    |    |    | 9         | 20411146  | 20411236  |           |          |
| hsa-mir-491     |      | 1  | 1 1 1 0 1 0 0 0 1 1 0 1    | 0 0 1 1 1 1 1 1         | 1 1 1 1 1 1 1 1 1 1 1 1 1 1       | 0 0 0 0 1 1               | 0           | NA   | NA | 0   | NA | NA | 0  | 0  | 0         | 0         | 9         | 20716104  | 20716187 |
| hsa-mir-31      | CONS | 1  | 1 1 1 1 1 0 0 1 1 1 1 1    | 1 1 1 1 1 1 1 1         | 1 1 1 0 1 1 1 1 1 1 1 1 0         | 0 1 1 1 1                 | NA          | 1 1  | NA | 1 1 | NA | NA | NA | NA | NA        | 9         | 21512114  | 21512184  |          |
| hsa-mir-876     |      | 1  | 1 1 1 0 1 1 1 1 1 1 1 1    | 0 0 1 1 1 1 1 1         | 1 1 1 0 1 1 1 1 1 1 1 1 1 1       | 1 1 1 1 1 1               | NA          | NA   | NA | NA  | NA | NA | NA | NA | NA        | 9         | 28863624  | 28863704  |          |
| hsa-mir-873     | -1   | 1  | 1 1 1 0 1 1 1 1 0 1 1      | 0 0 1 1 1 1 1 1         | 1 1 1 0 1 1 0 1 0 1 0 1 1 1       | 1 0 1 1 1 1               | NA          | 0 1  | NA | 1 1 | 0  | NA | NA | NA | NA        | 9         | 28888877  | 28888953  |          |
| hsa-mir-4667    |      | 2  | 1 1 1 1 1 1 1 1 0 1 0 0    | -1 0 0 0 -1 0 -1 0      | 1 1 0 0 1 0 1 1 -1 0 0 -1 0       | 0 0 0 0 0                 |             |      |    |     |    |    |    |    | 9         | 35608091  | 35608156  |           |          |
| hsa-mir-4475    | NO   | 14 | 1 1 1 1 1 1 0 0 0 0 0 0    | 0 0 0 0 0 0 0 0 0       | 0 0 0 0 0 0 0 0 0 0 0 0 0         | 0 0 0 0 0 0               |             |      |    |     |    |    |    |    | 9         | 36823536  | 36823596  |           |          |
| hsa-mir-4540    | NO   | 14 | 1 0 1 1 1 0 0 0 -1 0 0     | 0 0 0 0 0 0 0 0 0       | 0 0 0 -1 -1 0 0 -1 0 0 0 0        | 0 0 0 0 0                 | 0           | NA   | NA | 0   | NA | NA | 0  | 0  | 0         | 0         | 9         | 36864251  | 36864305 |
| hsa-mir-4476    | NO   | 14 | 1 1 1 1 1 1 1 1 0 0 0 0    | 1 -1 0 0 0 0 0 0        | 0 -1 0 -1 -1 0 0 -1 0 0 0 0       | 0 0 0 0 0                 |             |      |    |     |    |    |    |    | 9         | 36893459  | 36893528  |           |          |
| hsa-mir-204     | CONS | 1  | 1 1 1 1 1 1 1 1 1 1 1 1    | 1 1 1 1 1 1 1 1 1       | 1 1 1 1 1 1 1 1 1 1 1 1 0         | 1 1 1 1 1 1               | 1           | NA   | NA | 1   | NA | NA | 0  | 0  | 1         | 1         | 9         | 73424891  | 73425000 |
| hsa-mir-7-1     | CONS | 1  | 1 1 1 1 1 1 1 1 1 1 1 0    | 0 0 1 1 1 1 1 1         | 1 0 1 0 0 1 1 0 1 1 1 1 1         | 1 0 1 1 1 1               | NA          | 1 1  | NA | 1 1 | 1  | NA | NA | NA | NA        | 9         | 86584663  | 86584772  |          |
| hsa-mir-4289    | NO   | 14 | 1 1 1 -1 -1 1 -1 0 -1 0    | -1 -1 -1 -1 -1 0 0      | -1 -1 -1 0 0 0 -1 0 -1 0 0        | 0 -1 0 0 0                |             |      |    |     |    |    |    |    | 9         | 91360751  | 91360820  |           |          |
| hsa-mir-3153    | NO   | 14 | 1 0 1 1 1 1 -1 0 0 0 0     | 0 0 0 0 0 0 0 0 0       | 0 0 0 0 0 0 0 0 0 0 0 0 0         | 0 0 0 0 0 0               |             |      |    |     |    |    |    |    | 9         | 91927140  | 91927221  |           |          |
| hsa-mir-4290    | NO   | 14 | 1 1 1 0 1 -1 0 0 -1 -1 0   | 0 0 -1 -1 -1 0 0        | 0 0 0 -1 0 0 0 -1 1 -1 0 0 0      | 0 0 0 -1 0                |             |      |    |     |    |    |    |    | 9         | 92785723  | 92785817  |           |          |
| hsa-mir-3910-1  | NO   | 14 | -1 0 0 0 0 0 0 0 0 0 0     | 0 0 0 0 0 0 -1 0        | 0 0 0 0 0 0 0 0 0 0 -1            | 0 0 0 0 0 0               |             |      |    |     |    |    |    |    | 9         | 94398533  | 94398643  |           |          |
| hsa-mir-3910-2  | NO   | 14 | 1 -1 0 0 0 0 0 0 0 0 0     | 0 0 0 0 0 0 0 0 0       | 0 0 0 0 0 0 0 0 0 0 0 0 0         | 0 0 0 0 0 0               |             |      |    |     |    |    |    |    | 9         | 94398546  | 94398627  |           |          |
| hsa-mir-3651    | NO   | 14 | 1 1 1 1 1 1 1 1 1 1 1 1    | 1 1 1 1 1 1 1 1 1       | 1 1 1 0 1 1 1 1 1 0 1 1           | 0 1 1 1 1 1               | 0           | NA   | NA | 0   | NA | NA | 0  | 0  | 0         | 0         | 9         | 95054740  | 95054829 |
| hsa-mir-4670    |      | 9  | 1 -1 1 0 1 0 -1 0 0 0 0 0  | 0 0 0 0 0 0 0 0 0       | 0 0 0 0 0 0 0 0 0 0 0 0 0         | 0 0 0 0 0 0               |             |      |    |     |    |    |    |    | 9         | 95290266  | 95290340  |           |          |
| hsa-mir-548au   | NO   | 14 | 0 0 0 0 0 0 0 0 0 0 0 0    | 0 0 0 0 0 0 0 0 0       | 0 0 0 0 0 0 0 0 0 0 0 0 0         | 0 0 0 0 0 0               |             |      |    |     |    |    |    |    | 9         | 96357123  | 96357176  |           |          |
| hsa-mir-4291    | NO   | 14 | 1 1 1 1 1 1 -1 0 0 0 -1 -1 | 0 0 0 0 0 0 0 0 0       | 0 -1 0 0 0 0 0 0 1 0 1 -1 0       | 0 0 0 0 0                 |             |      |    |     |    |    |    |    | 9         | 96581639  | 96581703  |           |          |
| hsa-let-7a-1    | CONS | 1  | 1 1 1 1 1 1 1 1 1 1 1 1    | 1 1 1 1 1 1 1 1 1       | 1 1 1 1 1 1 1 1 1 1 1 1 1 1       | 1 1 1 1 1 1               | NA          | 1 1  | NA | 1 1 | NA | NA | NA | NA | NA        | 9         | 96938239  | 96938318  |          |
| hsa-let-7f-1    | CONS | 1  | 1 1 1 1 1 1 1 1 1 1 1 1    | 1 1 1 1 1 1 1 1 1       | 1 1 1 1 1 1 1 1 1 1 1 1 1 1       | 1 1 1 1 1 1               | NA          | 1 1  | NA | 1 1 | NA | NA | NA | NA | NA        | 9         | 96938629  | 96938715  |          |
| hsa-let-7d      | CONS | 1  | 1 1 1 1 1 1 1 0 0 1 1 1    | 0 0 1 1 1 1 1 1         | 0 0 1 0 0 1 1 0 1 0 1 1 1 1       | 1 1 1 1 0 1               | NA          | 0 1  | NA | 1 1 | NA | NA | NA | NA | NA        | 9         | 96941116  | 96941202  |          |
| hsa-mir-2278    | NO   | 14 | 1 1 1 -1 1 1 0 0 0 -1 0 0  | 0 0 -1 -1 -1 -1 0       | -1 0 -1 0 0 0 -1 0 1 -1 0 0       | 0 0 -1 1 0                | 0           | NA   | NA | 0   | NA | NA | 0  | 0  | 0         | 0         | 9         | 97572244  | 97572339 |
| hsa-mir-23b     | CONS | 1  | 1 1 1 1 1 1 1 0 1 1 1 1    | 1 1 1 1 1 1 1 -1 1      | 1 1 0 1 1 1 1 1 1 1 1 0           | 1 1 1 1 0 1               | 1           | NA   | NA | 0   | NA | NA | 0  | 0  | 1         | 1         | 9         | 97847490  | 97847586 |
| hsa-mir-27b     | CONS | 1  | 1 1 1 1 1 1 1 1 0 1 1 1    | 1 1 1 1 1 1 1 1 1       | 1 1 1 1 1 1 1 1 1 1 1 1 1 1       | 1 1 1 1 0 1               | 1           | NA   | NA | 0   | NA | NA | 0  | 0  | 1         | 1         | 9         | 97847727  | 97847823 |
| hsa-mir-3074    | CONS | 1  | 1 1 1 1 1 1 1 0 1 1 1 1    | 1 1 1 1 1 1 1 1 1       | 1 1 1 1 1 1 1 1 1 1 1 1 1 1       | 1 1 1 1 1 1               | 1           | NA   | NA | 0   | NA | NA | 0  | 0  | 1         | 1         | 9         | 97848296  | 97848376 |
| hsa-mir-24-1    | CONS | 1  | 1 1 1 1 1 1 1 0 1 1 1 1    | 1 1 1 1 1 1 1 1 1       | 1 1 1 1 1 1 1 1 1 1 1 1 1 1       | 1 1 1 1 1 1               | 1           | NA   | NA | 0   | NA | NA | 0  | 0  | 1         | 1         | 9         | 97848303  | 97848370 |
| hsa-mir-1302-8  | NO   | 14 | 1 1 1 1 -1 -1 -1 -1 -1 -1  | -1 1 -1 0 0 -1 -1 -1    | 1 0 0 1 0 0 0 0 -1 -1 -1 0        | 0 0 0 0 0                 |             |      |    |     |    |    |    |    | 9         | 100125836 | 100125963 |           |          |
| hsa-mir-32      | CONS | 1  | 1 1 0 1 1 1 1 1 1 1 1 0    | 1 1 1 1 1 1 1 1 1       | 1 1 1 0 1 1 1 1 1 1 0 1           | 1 1 1 1 1 1               | 1           |      |    |     |    |    |    |    |           |           |           |           |          |























|                 |    |      |                            |                       |                               |                         |             |        |                |               |    |          |          |         |
|-----------------|----|------|----------------------------|-----------------------|-------------------------------|-------------------------|-------------|--------|----------------|---------------|----|----------|----------|---------|
| hsa-mir-521-1   | NO | 14   | 1 1 1 1 1 0 0 0 -1 0 0     | 0 0 0 0 0 0 0 0 0     | 0 0 -1 0 0 0 0 0 0 0 0 0      | 0 0 0 0 0 0             |             |        |                |               | 19 | 54251890 | 54251976 |         |
| hsa-mir-522     |    | 9    | 1 1 1 -1 1 0 0 0 0 0 0     | 0 0 0 0 0 0 0 0 0     | 0 0 -1 0 0 0 0 0 0 0 0 0      | 0 0 0 0 0 0             |             |        |                |               | 19 | 54254465 | 54254551 |         |
| hsa-mir-519a-1  |    | 6    | 1 1 1 1 1 0 0 0 1 0 0      | 0 0 0 0 0 0 0 0 0     | 0 0 -1 0 0 0 0 0 0 0 0 0      | 0 0 0 0 0 0             |             |        |                |               | 19 | 54255651 | 54255735 |         |
| hsa-mir-527     | NO | 14   | 1 1 1 1 1 0 0 0 -1 0 0     | 0 0 0 0 0 0 0 0 0     | 0 0 0 0 0 0 0 0 0 0 0 0       | 0 0 0 0 0 0             |             |        |                |               | 19 | 54257272 | 54257356 |         |
| hsa-mir-516a-1  |    | 6    | 1 1 1 1 1 0 0 0 1 0 0      | 0 0 0 0 0 0 0 0 0     | 0 0 0 0 0 0 0 0 0 0 0 0       | 0 0 0 0 0 0             |             |        |                |               | 19 | 54259995 | 54260084 |         |
| hsa-mir-1283-2  | NO | 14   | 1 -1 -1 -1 -1 0 0 0 -1 0 0 | 0 0 0 0 0 0 0 0 0     | 0 0 -1 0 0 0 0 0 0 0 0 0      | 0 0 0 0 0 0             |             |        |                |               | 19 | 54261486 | 54261572 |         |
| hsa-mir-516a-2  |    | 6    | 1 1 1 1 1 0 0 0 1 0 0      | 0 0 0 0 0 0 0 0 0     | 0 0 0 0 0 0 0 0 0 0 0 0       | 0 0 0 0 0 0             |             |        |                |               | 19 | 54264387 | 54264476 |         |
| hsa-mir-519a-2  | NO | 14   | 1 1 1 1 1 0 0 0 1 0 0      | 0 0 0 0 0 0 0 0 0     | 0 0 -1 0 0 0 0 0 0 0 0 0      | 0 0 0 0 0 0             |             |        |                |               | 19 | 54265598 | 54265684 |         |
| hsa-mir-371a    |    | 1    | 1 1 1 1 1 0 0 1 1 1 1      | 0 0 1 1 1 1 1 1 1     | 1 0 0 0 0 1 1 0 0 1 1 1       | 0 0 1 1 1 1             | 0 NA NA     | 0 NA   | NA 0 0 0 0     | 0 NA          | 19 | 54290929 | 54290995 |         |
| hsa-mir-371b    |    | 1    | 1 1 1 1 1 0 0 1 1 1 1      | 0 0 1 1 1 1 1 1 1     | 1 0 0 0 0 1 1 0 0 1 1 1       | 0 0 1 1 1 1             | 0 NA NA     | 0 NA   | NA 0 0 0 0     | 0 NA          | 19 | 54290931 | 54290996 |         |
| hsa-mir-372     | NO | 14   | 1 1 1 1 1 0 0 1 1 1 1      | 0 0 1 0 1 1 1 1 1     | 0 0 0 0 0 1 1 0 0 1 1 1       | 0 0 1 1 1 0             | 0 NA NA     | 0 NA   | NA 0 0 0 0     | 0 NA          | 19 | 54291144 | 54291210 |         |
| hsa-mir-373     |    | 2    | 1 1 1 1 1 0 0 0 1 1 1      | 0 0 0 0 0 0 0 0 0     | 1 0 0 0 0 1 1 0 0 0 0 0       | 0 0 0 0 0 0             |             |        |                |               | 19 | 54291959 | 54292027 |         |
| hsa-mir-935     | NO | 14   | 1 0 0 0 1 0 0 0 0 1 0      | 0 0 0 0 0 0 0 0 0     | 0 0 0 0 0 1 0 0 0 0 0 0       | 0 1 0 1 0 0             | 0 NA NA     | 0 NA   | NA 0 0 0 0     | 0 NA          | 19 | 54485561 | 54485651 |         |
| hsa-mir-4754    | NO | 14   | 1 1 0 -1 -1 0 -1 -1 0 -1 0 | 0 0 0 0 -1 -1 -1 -1   | -1 0 0 0 0 -1 0 0 -1 0 0      | 0 0 -1 1 -1             | 0 NA NA     | 0 NA   | NA 0 0 0 0     | 0 NA          | 19 | 58898137 | 58898225 |         |
| hsa-mir-1292    | NO | 14   | 1 1 1 -1 -1 0 0 -1 -1 -1   | 0 0 -1 -1 -1 -1 -1    | -1 -1 -1 -1 -1 0 0 -1 -1 -1   | -1 0 -1 -1 -1           |             |        |                |               | 20 | 2633423  | 2633488  |         |
| hsa-mir-103a-2  |    | CONS | 1 1 1 1 0 1 1 1 1 1 0      | 1 1 1 1 1 1 1 1 1     | 1 1 1 0 1 1 1 1 1 1 1         | 1 1 1 1 1 1             | NA 1 1      | NA 0   | 1 NA NA NA NA  | 1             | 20 | 3898141  | 3898218  |         |
| hsa-mir-103b-2  | NO | NO   | 14                         | 0 0 0 0 0 0 0 0 0 0 0 | 0 0 0 0 0 0 0 0 0             | 0 0 0 0 0 0 0 0 0 0 0 0 | 0 0 0 0 0 0 | NA 0 1 | NA NA          | 1 NA NA NA NA | 0  | 20       | 3898149  | 3898210 |
| hsa-mir-3192    | NO | 14   | 1 1 1 -1 -1 -1 1 0 1 0     | 0 0 0 0 0 1 0 0 0     | 0 0 0 0 0 -1 0 -1 0 1 0 0     | 1 0 1 0 0 0             | 0 NA NA     | 0 NA   | NA 0 0 0 0     | 0 NA          | 20 | 18451259 | 18451335 |         |
| hsa-mir-663a    | NO | 14   | 1 1 1 0 -1 0 0 0 -1 -1     | 0 0 0 -1 0 -1 0       | -1 0 -1 0 0 -1 -1 0 -1 -1 -1  | -1 -1 -1 0 0            |             |        |                |               | 20 | 26188822 | 26188914 |         |
| hsa-mir-3193    | NO | 14   | 1 1 -1 -1 -1 0 1 -1 0 0    | 0 0 -1 0 0 -1 0       | -1 -1 0 0 0 -1 0 0 -1 0 0     | 0 0 -1 0 0              |             |        |                |               | 20 | 30194989 | 30195043 |         |
| hsa-mir-1825    | NO | 14   | 1 1 1 0 1 1 1 0 0 0 0      | 0 0 0 0 -1 0 0 0 0    | 0 0 0 0 0 0 0 0 0 0 0 0       | 0 0 0 0 0 0             |             |        |                |               | 20 | 30825598 | 30825650 |         |
| hsa-mir-4755    |    | 12   | 1 1 0 0 0 0 0 0 -1 0       | 0 0 0 0 0 0 0 0 0     | 0 0 0 0 0 0 0 0 0 0 0 0       | 0 0 0 0 0 0             |             |        |                |               | 20 | 32636925 | 32636996 |         |
| hsa-mir-644a    | NO | 14   | 1 1 1 0 0 1 0 0 0 0 0      | 0 0 0 0 0 0 0 0 0     | 0 0 0 0 0 0 0 0 0 0 0 0       | 0 0 0 0 0 0             |             |        |                |               | 20 | 33054130 | 33054223 |         |
| hsa-mir-499a    |    | CONS | 1 1 0 1 1 1 1 0 1 1 1      | 1 1 1 1 1 0 1 1 1     | 1 1 1 0 1 1 1 1 1 1 1 1       | 0 1 1 1 1 1             | 1 NA NA     | 0 NA   | NA 1 1 1 1     | 1 NA          | 20 | 33578179 | 33578300 |         |
| hsa-mir-499b    |    | CONS | 1 1 0 1 1 1 1 0 1 1 1      | 1 1 1 1 1 0 1 1 1     | 1 1 1 0 1 1 1 1 1 1 1 1       | 0 1 1 1 1 1             | 1 NA NA     | 0 NA   | NA 1 1 1 1     | 1 NA          | 20 | 33578203 | 33578275 |         |
| hsa-mir-5480-2  |    | 7    | 1 1 1 1 1 0 1 0 0 0 0      | 0 0 0 0 0 0 0 0 0     | 0 0 0 0 0 0 0 0 0 0 0 0       | 0 0 0 0 0 0             |             |        |                |               | 20 | 37145206 | 37145275 |         |
| hsa-mir-3646    | NO | 14   | 1 0 0 0 1 1 0 0 0 0 0      | 0 0 0 0 0 0 0 0 0     | 0 0 0 0 0 0 0 0 0 0 0 0       | 0 0 0 0 0 0             |             |        |                |               | 20 | 43036760 | 43036843 |         |
| hsa-mir-3617    | NO | 14   | 1 1 1 1 1 1 0 0 0 0 0      | 0 0 0 0 0 0 0 0 0     | 0 0 0 0 0 0 0 0 0 0 0 0       | 0 0 0 0 0 0             |             |        |                |               | 20 | 44333741 | 44333819 |         |
| hsa-mir-3616    |    | 8    | 1 0 1 0 0 1 -1 0 0 0 0     | 0 0 0 0 0 0 0 0 0     | 0 0 0 0 0 -1 0 0 0 0 0 0      | 0 0 0 0 0 0             |             |        |                |               | 20 | 45795609 | 45795700 |         |
| hsa-mir-645     | NO | 14   | 1 1 1 1 0 -1 1 0 0 0 0     | 0 0 0 0 0 0 0 0 0     | 0 0 0 0 0 0 0 0 0 0 0 0       | 0 0 0 0 0 0             |             |        |                |               | 20 | 49202323 | 49202416 |         |
| hsa-mir-1302-5  | NO | 14   | 1 0 1 1 1 1 0 1 0 1 0      | 0 0 0 1 0 0 0 0 0     | 0 0 0 0 0 0 0 0 0 0 0 0       | 0 0 0 0 0 0             |             |        |                |               | 20 | 49231173 | 49231322 |         |
| hsa-mir-3194    |    | 7    | 1 1 1 1 -1 1 1 0 0 0 0     | 0 0 0 0 0 0 0 0 0     | 0 0 0 0 0 0 0 0 0 0 0 0       | 0 0 1 0 0 0             | 0 NA NA     | 0 NA   | NA 0 0 0 0     | 0 NA          | 20 | 50069442 | 50069514 |         |
| hsa-mir-4325    | NO | 14   | 1 1 1 1 1 1 0 0 1 0 0      | 0 0 0 0 0 0 0 0 0     | 1 0 -1 0 0 0 0 -1 0 -1 0 0    | 0 0 0 0 0 0             |             |        |                |               | 20 | 55896558 | 55896647 |         |
| hsa-mir-4532    | NO | 14   | 1 0 1 1 1 0 0 0 0 0 0      | 0 0 0 0 0 0 0 0 0     | 0 0 0 0 0 0 0 0 0 0 0 0       | 0 0 0 0 0 0             |             |        |                |               | 20 | 56470450 | 56470500 |         |
| hsa-mir-296     |    | 1    | 1 1 1 1 1 1 1 1 1 1 1      | 1 1 1 1 1 0 -1 0      | 1 1 1 1 1 1 1 1 1 0 1 0       | 0 1 1 1 1 -1            | 0 NA NA     | 0 NA   | NA 0 0 0 0     | 0 NA          | 20 | 57392670 | 57392749 |         |
| hsa-mir-298     | NO | 14   | 1 1 1 1 1 1 1 -1 -1 -1     | -1 -1 0 0 -1 -1 0     | -1 -1 0 0 -1 -1 1 -1 -1 0 0 0 | 0 -1 -1 0 0             |             |        |                |               | 20 | 57393281 | 57393368 |         |
| hsa-mir-646     | NO | 14   | 1 1 1 -1 -1 0 1 0 -1 -1    | 0 0 0 -1 0 -1 0       | 0 0 0 0 -1 -1 0 -1 -1 0 0 0   | -1 0 -1 0 0             |             |        |                |               | 20 | 58883532 | 58883625 |         |
| hsa-mir-4533    | NO | 14   | 1 1 1 1 1 1 0 0 -1 0 0     | 0 0 0 -1 -1 0 0       | 0 0 0 0 0 0 0 0 0 0 0 0       | 0 0 0 0 0 0             |             |        |                |               | 20 | 59053169 | 59053239 |         |
| hsa-mir-548ag-2 | NO | 14   | 1 1 1 1 1 1 0 0 0 0 0      | 0 0 0 0 0 0 0 0 0     | 0 0 0 0 0 0 0 0 0 0 0 0       | 0 0 0 0 0 0             |             |        |                |               | 20 | 59139620 | 59139683 |         |
| hsa-mir-1257    | NO | 14   | 1 1 1 1 1 -1 0 0 0 0 0     | 0 0 0 0 0 0 0 0 0     | 0 0 0 0 0 0 0 0 0 0 0 0       | 0 0 0 0 0 0             |             |        |                |               | 20 | 60528602 | 60528718 |         |
| hsa-mir-3195    | NO | 14   | 1 1 0 0 1 0 0 0 0 0 0      | -1 0 0 0 0 0 0 0      | 0 0 0 0 0 0 0 0 0 0 0 0       | 0 0 0 0 0 0             |             |        |                |               | 20 | 60639858 | 60639941 |         |
| hsa-mir-4758    |    | 2    | 1 0 1 0 0 0 1 0 0 -1       | -1 -1 0 -1 0 -1 0     | 1 0 0 0 -1 -1 0 1 -1 -1 -1 -1 | 0 -1 0 -1 -1            |             |        |                |               | 20 | 60907543 | 60907613 |         |
| hsa-mir-1-1     | NO | 14   | 1 1 0 1 1 1 0 0 1 1 0      | 0 0 0 1 1 -1 1 1      | 1 1 1 0 1 1 1 1 1 1 1 1       | 1 1 1 1 1 0             | 0 NA NA     | 0 NA   | NA 0 0 0 0     | 0 NA          | 20 | 61151513 | 61151583 |         |
| hsa-mir-133a-2  | NO | 14   | 1 1 0 1 1 1 0 0 1 1 0      | 0 0 0 1 1 1 1 1       | 1 1 1 0 0 1 1 1 1 1 1 1       | 1 1 1 1 1 1             | 0 NA NA     | 0 NA   | NA 0 0 0 0     | 0 NA          | 20 | 61162119 | 61162220 |         |
| hsa-mir-124-3   |    | CONS | 1 0 1 1 1 0 1 1 1 1 1      | 1 1 1 1 1 -1 1 1      | 0 1 0 0 1 1 1 0 1 1 1 1       | 0 1 1 1 1 1             | NA 1 1      | NA 1   | 1 NA NA NA NA  | NA            | 20 | 61809852 | 61809938 |         |
| hsa-mir-3196    | NO | 14   | 1 -1 1 1 1 1 -1 0 0 -1     | 0 0 0 -1 0 -1 0       | -1 0 0 0 0 -1 0 0 -1 0 0 0    | 0 0 0 0 0 0             |             |        |                |               | 20 | 61870131 | 61870194 |         |
| hsa-mir-4326    | NO | 14   | 1 1 1 1 1 0 -1 0 0 0 0     | 0 0 0 0 0 0 0 0 0     | 0 0 0 0 0 0 0 0 0 0 0 0       | 0 0 0 0 0 0             |             |        |                |               | 20 | 61918160 | 61918218 |         |
| hsa-mir-941-1   | NO | 14   | 1 0 0 0 0 0 0 0 0 0 0      | 0 0 0 0 0 0 0 0 0     | 0 0 0 0 0 0 0 0 0 0 0 0       | 0 0 0 0 0 0             |             |        |                |               | 20 | 62550778 | 62550894 |         |
| hsa-mir-941-3   | NO | 14   | 1 0 0 0 0 0 0 0 0 0 0      | 0 0 0 0 0 0 0 0 0     | 0 0 0 0 0 0 0 0 0 0 0 0       | 0 0 0 0 0 0             |             |        |                |               | 20 | 62551085 | 62551201 |         |
| hsa-mir-941-4   | NO | 14   | 1 0 0 0 0 0 0 0 0 0 0      | 0 0 0 0 0 0 0 0 0     | 0 0 0 0 0 0 0 0 0 0 0 0       | 0 0 0 0 0 0             |             |        |                |               | 20 | 62551197 | 62551313 |         |
| hsa-mir-1914    |    | 2    | 1 0 1 1 1 1 0 0 -1 1       | 0 0 0 0 0 1 0 0       | 1 -1 0 0 0 1 1 -1 -1 -1 1     | 0 -1 -1 -1 0            |             |        |                |               | 20 | 62572818 | 62572897 |         |
| hsa-mir-647     | NO | 14   | 1 0 -1 -1 0 -1 0 0 0 -1    | 0 0 -1 -1 -1 -1 0     | -1 -1 0 0 -1 -1 -1 -1 -1 -1 0 | 0 0 -1 0 0              |             |        |                |               | 20 | 62573984 | 62574079 |         |
| hsa-mir-3118-5  | NO | 14   | 1 1 -1 0 0 0 0 0 0 0 0     | 0 0 0 0 0 0 0 0 0     | 0 0 0 0 0 0 0 0 0 0 0 0       | 0 0 0 0 0 0             |             |        |                |               | 21 | 15017096 | 15017171 |         |
| hsa-mir-99a     |    | 1    | 1 1 1 1 1 1 1 1 1 1 1      | 1 1 1 1 1 1 1 1 1     | 1 1 1 1 1 1 1 0 1 1 1 1 1     | 1 1 1 1 1 1             | 0 NA NA     | 0 NA   | NA 0 0 0 0     | 0 NA          | 21 | 17911409 | 17911489 |         |
| hsa-let-7c      | NO | 14   | 1 1 1 1 1 1 1 1 1 1 1      | 1 1 1 1 1 1 1 1 1     | 1 1 1 1 1 1 1 1 1 1 1 1       | 1 1 1 1 1 1             | 0 NA NA     | 0 NA   | NA 0 0 0 0     | 0 NA          | 21 | 17912148 | 17912231 |         |
| hsa-mir-548x    |    | 7    | 1 1 0 0 1 0 1 0 0 0 0      | 0 0 0 0 0 0 0 0 0     | 0 0 0 0 0 0 0 0 0 0 0 0       | 0 0 0 0 0 0             |             |        |                |               | 21 | 20058408 | 20058482 |         |
| hsa-mir-155     |    | CONS | 1 1 1 1 1 1 1 1 0 1 1      | 1 1 0 1 1 1 1 1 1     | 1 1 1 1 1 1 1 1 1 1 1 1       | 1 0 1 1 1 1             | NA 1 1      | NA 1   | 1 NA NA NA NA  | NA            | 21 | 26946292 | 26946356 |         |
| hsa-mir-4759    | NO | 14   | 1 1 1 1 1 1 0 0 0 0 0      | 0 0 0 0 0 0 0 0 0     | 0 0 0 0 0 0 0 0 0 0 0 0       | 0 0 0 0 0 0             |             |        |                |               | 21 | 28326280 | 28326362 |         |
| hsa-mir-4327    | NO | 14   | 1 1 0 1 1 -1 0 0 -1 0      | 0 0 0 0 0 0 0 0 0     | 0 0 -1 0 0 -1 0 0 -1 0 0 0    | 0 0 0 0 0 0             |             |        |                |               | 21 | 31747612 | 31747696 |         |
| hsa-mir-802     | NO | 14   | 1 1 1 1 1 1 1 1 1 1 1      | 1 1 1 1 1 1 1 1 1     | 1 1 1 0 1 1 1 1 1 1 1 1       | 0 1 1 0 1 1             | NA NA NA    | NA NA  | NA NA NA NA NA | NA            | 21 | 37093013 | 37093106 |         |
| hsa-mir-4760    |    | 9    | 1 1 1 0 1 0 0 -1 0 0       | 0 0 0 1 0 0 0 0       | 0 0 0 0 -1 0 0 0 0 0 0 0      | 0 0 0 0 0 0             |             |        |                |               | 21 | 41584279 | 41584358 |         |
| hsa-mir-3197    | NO | 14   | 1 1 1 1 1 0 -1 0 0 1 0     | 0 0 0 0 1 0 -1 0      | 1 0 0 0 0 1 0 1 0 -1 0 0      | 0 1 0 0 0 0             | NA NA NA    | NA NA  | NA NA NA NA NA | NA            | 21 | 42539484 | 42539556 |         |







|                |    |    |   |   |   |   |   |   |    |    |    |    |   |    |    |    |    |    |    |   |    |   |    |    |    |    |   |    |    |    |    |    |    |    |   |    |    |    |    |    |    |    |    |    |    |    |           |           |           |           |           |           |           |
|----------------|----|----|---|---|---|---|---|---|----|----|----|----|---|----|----|----|----|----|----|---|----|---|----|----|----|----|---|----|----|----|----|----|----|----|---|----|----|----|----|----|----|----|----|----|----|----|-----------|-----------|-----------|-----------|-----------|-----------|-----------|
| hsa-mir-514a-1 |    | 1  | 1 | 1 | 0 | 0 | 0 | 0 | 0  | -1 | -1 | 1  | 0 | 0  | 0  | -1 | 1  | 0  | -1 | 0 | -1 | 0 | 0  | 1  | 1  | 0  | 1 | -1 | -1 | -1 | 0  | 1  | 1  | -1 | 0 | NA | X  | 146360765 | 146360862 |           |           |           |           |           |
| hsa-mir-514a-2 |    | 1  | 1 | 1 | 1 | 1 | 1 | 0 | 0  | -1 | -1 | 1  | 0 | 0  | 0  | -1 | -1 | 0  | -1 | 0 | -1 | 0 | 0  | -1 | 1  | 0  | 1 | -1 | -1 | -1 | 0  | 1  | 1  | 1  | 0 | NA | X         | 146363461 | 146363548 |           |           |           |           |
| hsa-mir-514a-3 |    | 2  | 1 | 1 | 0 | 0 | 1 | 0 | 0  | 0  | 0  | -1 | 1 | 0  | 0  | -1 | -1 | 0  | -1 | 0 | -1 | 0 | 0  | 0  | 1  | 0  | 1 | -1 | -1 | -1 | 0  | -1 | 1  | -1 | 0 | NA | X  | 146366159 | 146366246 |           |           |           |           |           |
| hsa-mir-2114   |    | 1  | 1 | 1 | 1 | 1 | 1 | 1 | 0  | 1  | 0  | 1  | 0 | 0  | 0  | -1 | -1 | 0  | -1 | 0 | 0  | 0 | 0  | 1  | 1  | 1  | 1 | 0  | 0  | 0  | 0  | 1  | 1  | -1 | 0 | NA | X  | 149396239 | 149396318 |           |           |           |           |           |
| hsa-mir-4330   | NO | 14 | 1 | 1 | 1 | 1 | 1 | 1 | 0  | 0  | 1  | 0  | 0 | 0  | -1 | -1 | 0  | 0  | 0  | 1 | 1  | 0 | 0  | -1 | -1 | -1 | 1 | 0  | -1 | 0  | 0  | 0  | -1 | 1  | 0 | NA | 0  | 1  | NA | 1  | NA | NA | NA | NA | NA | NA | X         | 150336694 | 150336798 |           |           |           |           |
| hsa-mir-105-1  |    | 1  | 1 | 1 | 1 | 1 | 1 | 1 | 1  | 1  | 1  | 1  | 1 | 0  | 0  | 1  | -1 | 1  | 1  | 1 | 1  | 1 | 1  | 1  | 1  | 1  | 1 | 1  | 1  | 1  | 1  | 1  | 0  | 0  | 1 | -1 | 1  | NA        | X         | 151560691 | 151560771 |           |           |           |
| hsa-mir-767    |    | 2  | 1 | 1 | 1 | 1 | 1 | 1 | 1  | 1  | -1 | 1  | 1 | 1  | 1  | 1  | 1  | 0  | 1  | 1 | 1  | 1 | 0  | 1  | 1  | 1  | 0 | -1 | 1  | 1  | -1 | 1  | 0  | 0  | 0 | 0  | 0  | 0  | 0  | 0  | 0  | 0  | 0  | 0  | 0  | X  | 151561893 | 151562001 |           |           |           |           |           |
| hsa-mir-105-2  |    | 1  | 1 | 1 | 1 | 1 | 1 | 0 | 1  | 1  | 1  | 1  | 1 | -1 | 1  | 1  | 1  | 1  | 1  | 1 | 1  | 0 | 1  | 1  | 1  | 1  | 1 | 1  | 1  | 1  | 1  | 1  | 0  | 0  | 1 | -1 | 1  | NA        | X         | 151562884 | 151562964 |           |           |           |
| hsa-mir-3202-1 | NO | 14 | 1 | 1 | 1 | 1 | 0 | 1 | 0  | 0  | 0  | 0  | 0 | 0  | 0  | 0  | 0  | 0  | 0  | 0 | 0  | 0 | 0  | 0  | 0  | 0  | 0 | 0  | 0  | 0  | 0  | 0  | 0  | 0  | 0 | 0  | 0  | 0  | 0  | 0  | 0  | 0  | 0  | 0  | 0  | X  | 153246548 | 153246628 |           |           |           |           |           |
| hsa-mir-3202-2 | NO | 14 | 1 | 1 | 1 | 1 | 0 | 1 | 0  | 0  | 0  | 0  | 0 | 0  | 0  | 0  | 0  | 0  | 0  | 0 | 0  | 0 | 0  | 0  | 0  | 0  | 0 | 0  | 0  | 0  | 0  | 0  | 0  | 0  | 0 | 0  | 0  | 0  | 0  | 0  | 0  | 0  | 0  | 0  | 0  | X  | 153246549 | 153246627 |           |           |           |           |           |
| hsa-mir-718    | NO | 14 | 1 | 1 | 1 | 1 | 0 | 0 | -1 | 1  | 1  | 0  | 0 | 0  | -1 | 1  | 1  | 1  | 0  | 1 | 0  | 0 | 1  | 0  | 0  | -1 | 0 | 1  | 0  | 1  | 0  | 0  | -1 | 0  | 1 | NA | 0  | 0  | NA | 0  | 0  | NA | NA | NA | NA | NA | X         | 153285371 | 153285440 |           |           |           |           |
| hsa-mir-644b   |    | 1  | 1 | 1 | 1 | 1 | 0 | 0 | 1  | 1  | 1  | 1  | 0 | 0  | 1  | 0  | 0  | -1 | 1  | 1 | -1 | 0 | -1 | 1  | 1  | 1  | 1 | -1 | -1 | -1 | -1 | -1 | 1  | 1  | 1 | 1  | 1  | NA | 0  | 0  | NA | 0  | 0  | NA | NA | NA | NA        | -1        | X         | 153996871 | 153996931 |           |           |
| hsa-mir-1184-1 | NO | 14 | 1 | 1 | 1 | 0 | 1 | 0 | 0  | -1 | -1 | 1  | 1 | 0  | 0  | -1 | 1  | 1  | 1  | 0 | 1  | 0 | 0  | -1 | -1 | 0  | 0 | -1 | 0  | 0  | -1 | 0  | 0  | -1 | 1 | 1  | 1  | 1  | 1  | NA | 0  | 1  | NA | NA | 1  | NA | NA        | NA        | NA        | NA        | X         | 154115635 | 154115733 |
